# Supplementary material for: Water facilitated photolysis of perfluoroalkyl iodidesviahalogen bonding
Source: Royal Society of Chemistry journal article supplement (doi:10.1039/d2qo00056c), 2022-01-01
Supplement: d2qo00056c1.pdf [file d2qo00056c1.pdf]

## *Supporting Information*

### **Water Facilitated Photolysis of Perfluoroalkyl Iodides via Halogen Bonding**

Chang-Zhen Fang,<sup>a+</sup> Be-Bei Zhang,<sup>a+</sup> Baolin Li,<sup>a\*</sup> Zhi-Xiang Wang<sup>a\*</sup> and Xiang-Yu Chen<sup>a\*</sup>

<sup>a</sup>School of Chemical Sciences, University of Chinese Academy of Sciences, Beijing 100049, China

## Contents

|                                                                         |     |
|-------------------------------------------------------------------------|-----|
| 1. General Information.....                                             | S3  |
| 2. Experimental Procedures.....                                         | S4  |
| 3. General Procedures.....                                              | S5  |
| 4. Compound Characterization Data.....                                  | S6  |
| 5. Mechanism Studies.....                                               | S15 |
| 5.1 UV/Vis absorption spectrometry.....                                 | S15 |
| 5.2 Determination of binding stoichiometry of halogen bond complex..... | S16 |
| 5.3 Determination of the association constant ( $K_{EDA}$ ).....        | S17 |
| 5.4 Photolysis reaction.....                                            | S18 |
| 5.5 Light On-Off Experiments.....                                       | S21 |
| 6. NMR Spectra.....                                                     | S22 |
| 7. Computational Details.....                                           | S71 |
| 8. References.....                                                      | S86 |

## 1. General Information

- Chemicals were purchased from Alfa Aesar, Heowns, Innochem and Bidepharm and used without further purification unless otherwise noted. Solvents were purified using a solvent-purification system (VSPS-8, Vigor) that contained activated alumina and molecular sieves.
- Flash column chromatography was performed using 200-300 mesh silica gel.
- IR spectra were taken on a Vertex 70 spectrophotometer and reported as wavenumbers ( $\text{cm}^{-1}$ ).
- UV-vis absorption spectra were acquired on UV-1900 spectrophotometer (Shimadzu, Japan).
- The WRS-2 was used to measure the melting point of solids.
- $^1\text{H}$ ,  $^{13}\text{C}$  and  $^{19}\text{F}$  NMR spectra were recorded on Shimadzu Avance 400 and Shimadzu Avance 500 spectrometers at ambient temperature. Chemical shifts ( $\delta$ ) are reported in ppm downfield of tetramethylsilane (TMS) and the residual solvent peaks were used as an internal reference, for  $^1\text{H}$  NMR:  $\text{CDCl}_3 = 7.26$  ppm; for  $^{13}\text{C}$  NMR:  $\text{CDCl}_3 = 77.16$  ppm. The order of citation in parentheses is a) multiplicity (s = singlet, d = doublet, t = triplet, q = quartet, dd = doublet of doublet, ddd = doublet of doublet of doublet, td = triplet of doublet, m = multiplet), b) coupling constants, c) number of protons. Coupling constants (J) are reported in Hertz (Hz). Photochemical experiments were performed magnetically stirred in 10 mL glass Sample bottle, sealed with a rubber septum. The tubes were irradiated with blue light (450 nm,) using a LED lamp with a power output of 50 W and directly contacted with the light source to keep the reaction temperature at  $65 \pm 5$  °C (The purchase link of LED lamp is <https://item.m.jd.com/product/47264027233.html>).

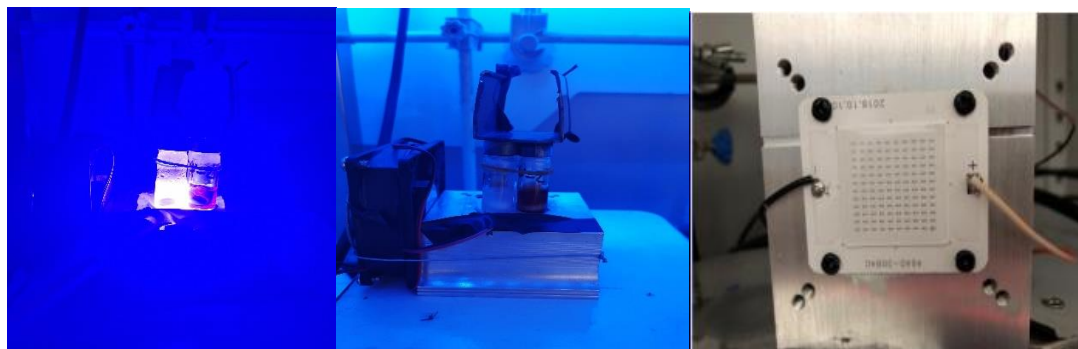

## 2. Experimental Procedures

**Scheme S1.** Optimization of the Reaction Conditions<sup>a</sup>

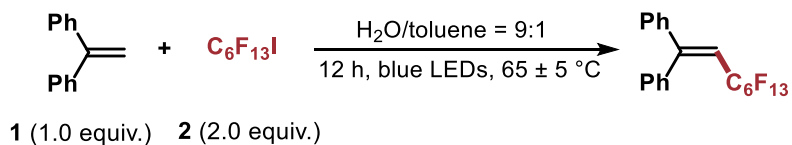

| Entry | Variations from standard conditions  | Yield (%) <sup>b</sup> |
|-------|--------------------------------------|------------------------|
| 1     | none                                 | 90                     |
| 2     | hexane                               | 35                     |
| 3     | THF                                  | 60                     |
| 4     | DCM                                  | 33                     |
| 5     | H <sub>2</sub> O                     | 43                     |
| 6     | Toluene                              | 50                     |
| 7     | acetonitrile                         | 24                     |
| 8     | hexane: H <sub>2</sub> O = 1:1       | 61                     |
| 9     | THF: H <sub>2</sub> O = 1:1          | 58                     |
| 10    | DCM: H <sub>2</sub> O = 1:1          | 62                     |
| 11    | toluene: H <sub>2</sub> O = 1:1      | 83                     |
| 12    | acetone: H <sub>2</sub> O = 1:1      | 65                     |
| 13    | xylene: H <sub>2</sub> O = 1:1       | 67                     |
| 14    | PE: H <sub>2</sub> O = 1:1           | 62                     |
| 15    | acetonitrile: H <sub>2</sub> O = 1:1 | 80                     |
| 16    | acetonitrile: H <sub>2</sub> O = 1:9 | 90                     |
| 17    | toluene: H <sub>2</sub> O = 3:7      | 85                     |
| 18    | toluene: H <sub>2</sub> O = 1:5      | 71                     |
| 19    | toluene: H <sub>2</sub> O = 1:6      | 69                     |
| 20    | toluene: H <sub>2</sub> O = 1:7      | 75                     |
| 21    | toluene: H <sub>2</sub> O = 1:8      | 82                     |
| 22    | toluene: H <sub>2</sub> O = 1:10     | 76                     |
| 23    | toluene: H <sub>2</sub> O = 1:15     | 58                     |
| 24    | toluene: H <sub>2</sub> O = 1:20     | 46                     |
| 25    | 38 °C                                | 33                     |
| 26    | 50 °C                                | 62                     |
| 27    | without irradiation (65 °C)          | trace                  |

<sup>a</sup> **1** (0.2 mmol), **2** (0.4 mmol), solvent (0.5 mL), irradiation with 50 W blue LEDs. <sup>b</sup> Yield is based on <sup>1</sup>H NMR analysis of crude reaction mixture.

### 3. General Procedures

#### General procedure A

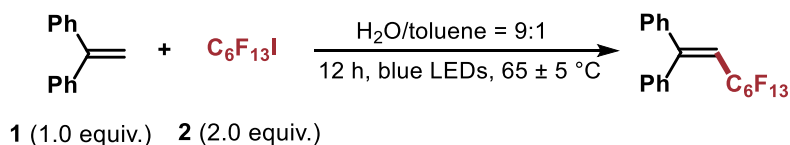

To a dry sample flask equipped with a stirring bar, the olefin (0.2 mmol, 1.0 equiv.), perfluoroalkyl iodide (0.4 mmol, 2.0 equiv.) were added. The tube was evacuated and filled with nitrogen (three times). After the addition of toluene (0.05 mL) and H<sub>2</sub>O (0.45 mL) to the mixture via gas-tight syringe, the mixture was stirred overnight at about 65 °C via a 50W blue LED (450 nm) lamp. Then the reaction mixture was subjected to silica gel chromatography to afford the desired product (PE:EA = 200:1 – 5:1).

#### General procedure B

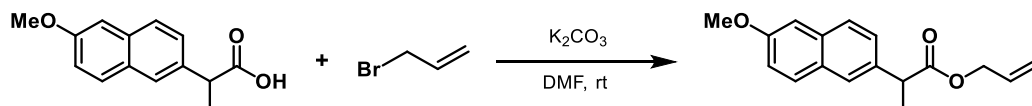

According to a literature procedure<sup>1</sup>: A round-bottom flask was charged with 2-(6-methoxynaphthalen-2-yl)propanoic acid (2 mmol, 1.0 equiv.) and allyl bromide (3 mmol, 1.5 equiv.) in the presence of K<sub>2</sub>CO<sub>3</sub> (3 mmol, 1.5 equiv.) in DMF. The reaction was stirred for 4 hours at room temperature, then the organic phase was washed with water and extracted with Et<sub>2</sub>O, dried over MgSO<sub>4</sub> and concentrated. The crude material was purified by flash column chromatography on silica gel to afford the product.

#### 4. Compound Characterization Data

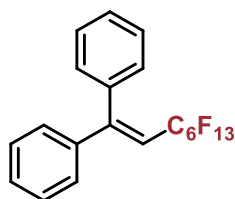

**(3-n-perfluorohexyl-1-ene-1,1-diyl)dibenzene (3):** Following the general procedure A, the title product was obtained after purification by column chromatography (PE) as a white solid (89.4 mg, 0.180 mmol, 90 % yield).  $^1\text{H NMR}$  (500 MHz, Chloroform-*d*)  $\delta$  7.39 - 7.31 (m, 6H), 7.25 - 7.22 (m, 4H), 6.1 (t,  $J$  = 14.7 Hz, 1H).  $^{13}\text{C NMR}$  (126 MHz, Chloroform-*d*)  $\delta$  154.5, 140.8, 137.6, 129.7, 129.1 (t,  $J$  = 3.0 Hz), 128.7, 128.5, 128.1, 128.0, 112.9 (t,  $J$  = 21.1 Hz).  $^{19}\text{F NMR}$  (471 MHz, Chloroform-*d*)  $\delta$  -80.7 (t,  $J$  = 10.1 Hz, 3F), -103.5 (q,  $J$  = 14.1, 13.4 Hz, 2F), -121.4 - -121.5 (m, 2F), -122.7 - -122.8 (m, 2F), -122.85 - -122.93 (m, 2F), -126.0 - -126.1 (m, 2F). These data are in agreement with those reported previously in the literature.<sup>2</sup>

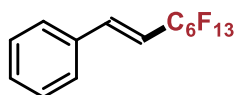

**(E)-(3-n-perfluorohexyl-1-octen-1-yl)benzene (4):** Following the general procedure A, the title product was obtained after purification by column chromatography (PE) as a transparent oil liquid (50.7 mg, 0.120 mmol, 60 % yield).  $^1\text{H NMR}$  (500 MHz, Chloroform-*d*)  $\delta$  7.51 - 7.38 (m, 4H), 7.18 (dt,  $J$  = 16.2, 2.5 Hz, 1H), 6.21 (dt,  $J$  = 16.2, 12.2 Hz, 1H).  $^{13}\text{C NMR}$  (126 MHz, Chloroform-*d*)  $\delta$  140.1 - 139.7 (t,  $J$  = 8.8 Hz), 133.7, 130.4, 129.1, 127.8, 114.4 (t,  $J$  = 23.0 Hz).  $^{19}\text{F NMR}$  (471 MHz, Chloroform-*d*)  $\delta$  -80.66 (t,  $J$  = 10.7 Hz, 3F), -111.0 - -111.1 (m, 2F), -121.4 - -121.6 (m, 2F), -122.7 - -122.8 (m, 2F), -123.1 - -123.2 (m, 2F), -126.0 - -126.1 (m, 2F). These data are in agreement with those reported previously in the literature.<sup>3</sup>

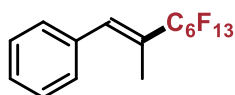

**(E)-(3-n-perfluorohexyl-2-methyloct-1-en-1-yl)benzene (5):** Following the general procedure A, the title product was obtained after purification by column chromatography (PE) as a transparent oil liquid (28.0 mg, 0.064 mmol, 32 % yield).  $^1\text{H NMR}$  (500 MHz, Chloroform-*d*)  $\delta$  7.43 - 7.38 (m, 2H), 7.36 - 7.32 (m, 3H), 7.03 (s, 1H), 2.04 - 2.03 (m, 3H).  $^{13}\text{C NMR}$  (126 MHz, Chloroform-*d*)  $\delta$  135.0 (t,  $J$  = 8.8 Hz), 134.9, 129.4, 128.6, 128.5, 126.1 (t,  $J$  = 20.7 Hz), 13.3.  $^{19}\text{F NMR}$  (471 MHz, Chloroform-*d*)  $\delta$  -80.6 (t,  $J$  = 10.0 Hz, 3F), -112.7 (t,  $J$  = 14.6 Hz, 2F), -121.5 - -121.6 (m, 2F), -121.7 - -121.8 (m, 2F), -122.6 - -122.8 (m, 2F), -126.0 - -126.1 (m, 2F). These data are in agreement with those reported previously in the literature.<sup>4</sup>

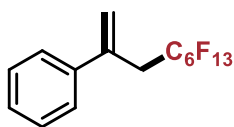

**(4-n-perfluorohexyl-1-en-2-yl)benzene (6):** Following the general procedure A, the title product was obtained after purification by column chromatography (PE) as a transparent oil liquid (56.5 mg, 0.13 mmol, 65% yield).  $^1\text{H NMR}$  (500 MHz, Chloroform-*d*)  $\delta$  7.42 – 7.29 (m, 5H), 5.65 (s, 1H), 5.38 (s, 1H), 3.29 (t,  $J$  = 18.6 Hz, 2H).  $^{13}\text{C NMR}$  (126 MHz, Chloroform-*d*)  $\delta$  140.4, 137.1, 128.6, 128.1, 126.2, 120.8, 36.3 (t,  $J$  = 22.0 Hz).  $^{19}\text{F NMR}$  (471 MHz, Chloroform-*d*)  $\delta$  -80.7 (t,  $J$  = 10.0 Hz, 2F), -112.3 (p,  $J$  = 17.9, 17.4 Hz, 2F), -121.7 – -121.8 (m, 2F), -122.7 – -122.8 (m, 2F), -122.9 – -123.0 (m, 2F), -126.0 – -126.1 (m, 2F). These data are in agreement with those reported previously in the literature.<sup>5</sup>

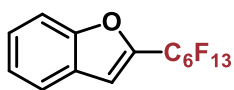

**2-(n-perfluorohexyl)benzofuran (7):** Following the general procedure A, the title product was obtained after purification by column chromatography (PE) as a transparent oil liquid (46.5 mg, 0.107 mmol, 53 % yield).  $^1\text{H NMR}$  (500 MHz, Chloroform-*d*)  $\delta$  7.69 - 7.66 (m, 1H), 7.59 - 7.57 (m, 1H), 7.47 - 7.45 (m, 1H), 7.35 - 7.32 (m, 1H), 7.255 - 7.248 (m, 1H).  $^{13}\text{C NMR}$  (126 MHz, Chloroform-*d*)  $\delta$  155.9, 127.2, 126.3, 124.2, 122.6, 112.3, 110.7.  $^{19}\text{F NMR}$  (376 MHz, Chloroform-*d*)  $\delta$  -80.7 (s, 3F), -111.8 (s, 2F), -121.9 (s, 2F), -122.4 (s, 2F), -122.7 (s, 2F), -126.1 (s, 2F). These data are in agreement with those reported previously in the literature.<sup>6</sup>

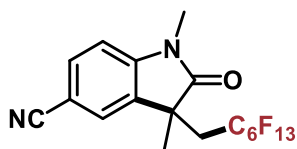

**1,3-dimethyl-2-oxo-3-(2-n-perfluorohexyl)indoline-5-carbonitrile (8):** Following the general procedure A, the title product was obtained after purification by column chromatography (PE/EA = 5:1) as a white solid (89 mg, 0.170 mmol, 85% yield).  $^1\text{H NMR}$  (400 MHz, Chloroform-*d*)  $\delta$  7.66 (dd,  $J$  = 8.2, 1.7 Hz, 1H), 7.542 – 7.535 (m, 1H), 6.97 (d,  $J$  = 8.1 Hz, 1H), 3.29 (s, 3H), 3.03 - 2.85 (m, 1H), 2.70 - 2.56 (m, 1H), 1.46 (s, 3H).  $^{13}\text{C NMR}$  (101 MHz, Chloroform-*d*)  $\delta$  178.3, 146.8, 134.0, 132.4, 127.2, 119.1, 109.2, 106.1, 44.1, 37.2 (t,  $J$  = 20.5 Hz), 26.9, 25.9.  $^{19}\text{F NMR}$  (376 MHz, Chloroform-*d*)  $\delta$  -80.8 (s, 3F), -106.0 – -115.0 (m, 2F), -121.7 (s, 2F), -122.8 (s, 2F), -123.8 (s, 2F), -126.1 (s, 2F). **IR** (neat): 3058, 2920, 2849, 2218, 1722, 1615, 1499, 1368, 1346, 1228, 1122, 822, 470  $\text{cm}^{-1}$ . **HRMS** (ESI):  $m/z$   $[\text{M}+\text{Na}]^+$  calcd for  $\text{C}_{18}\text{H}_{11}\text{ON}_2\text{F}_{13}\text{Na}^+$ : 541.0556; found 541.0556. **Melting Point** (Experimental): 140 °C – 142 °C.

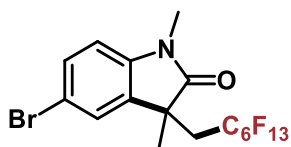

**5-bromo-1,3-dimethyl-3-(2-n-perfluorohexyl)indolin-2-one (9):**

Following the general procedure A, the title product was obtained after purification by column chromatography (PE/EA = 5:1) as a white solid (71 mg, 0.124 mmol, 62% yield). **<sup>1</sup>H NMR** (400 MHz, Chloroform-*d*)  $\delta$  7.45 (dd, *J* = 8.3, 1.9 Hz, 1H), 7.40 (d, *J* = 2.1 Hz, 1H), 6.78 (d, *J* = 8.3 Hz, 1H), 3.23 (s, 3H), 3.00 - 2.79 (m, 1H), 2.65 - 2.51 (m, 1H), 1.43 (s, 3H). **<sup>13</sup>C NMR** (101 MHz, Chloroform-*d*)  $\delta$  178.1, 142.0, 133.4, 131.6, 127.0, 115.4, 110.1, 44.5, 37.2 (t, *J* = 20.5 Hz), 26.7, 26.0. **<sup>19</sup>F NMR** (376 MHz, Chloroform-*d*)  $\delta$  -80.7 (s, 3F), -107.8 - -114.7 (m, 2F), -121.6 (s, 2F), -122.8 (s, 2F), -123.5 (s, 2F), -126.1 (s, 2F). **IR** (neat): 2986, 1710, 1609, 1493, 1362, 1185, 1143, 804, 696, 653, 563, 538, 466 cm<sup>-1</sup>. **HRMS** (ESI): *m/z* [M+Na]<sup>+</sup> calcd for C<sub>17</sub>H<sub>11</sub>ONBrF<sub>13</sub>Na<sup>+</sup>: 593.9709; found 593.9695. **Melting Point** (Experimental): 101 °C - 103 °C.

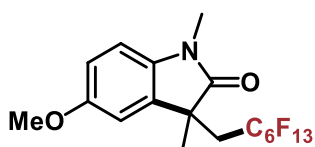

**5-methoxy-1,3-dimethyl-3-(2-n-perfluorohexyl)indolin-2-one**

**(10):** Following the general procedure A, the title product was obtained after purification by column chromatography (PE/EA = 5:1) as a white solid (49 mg, 0.093 mmol, 47% yield). **<sup>1</sup>H NMR** (400 MHz, Chloroform-*d*)  $\delta$  6.90 (d, *J* = 2.5 Hz, 1H), 6.84 (dd, *J* = 8.5, 2.4 Hz, 1H), 6.79 (d, *J* = 8.1 Hz, 1H), 3.81 (s, 3H), 3.23 (s, 3H), 2.97 - 2.79 (m, 1H), 2.65 - 2.51 (m, 1H), 1.43 (s, 3H). **<sup>13</sup>C NMR** (101 MHz, Chloroform-*d*)  $\delta$  178.4, 156.2, 136.5, 132.8, 112.7, 111.5, 108.9, 56.0, 44.8, 37.1 (t, *J* = 20.5 Hz), 26.7, 26.1. **<sup>19</sup>F NMR** (376 MHz, Chloroform-*d*)  $\delta$  -80.7 (s, 3F), -107.6 - -115.4 (m, 2F), -121.7 (s, 2F), -122.8 (s, 2F), -123.6 (s, 2F), -126.1 (s, 2F). **IR** (neat): 2919, 2849, 1705, 1602, 1496, 1361, 1288, 1232, 1182, 1141, 1121, 797, 696, 564, 536, 466cm<sup>-1</sup>. **HRMS** (ESI): *m/z* [M+Na]<sup>+</sup> calcd for C<sub>18</sub>H<sub>14</sub>O<sub>2</sub>F<sub>13</sub>Na<sup>+</sup>: 546.0709; found 546.0696. **Melting Point** (Experimental): 106 °C - 108 °C.

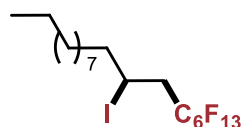

**2-(n-perfluorohexyl)benzofuran (11):**

Following the general procedure A, the title product was obtained after purification by column chromatography (PE) as a transparent oil liquid (115.7 mg, 0.188 mmol, 94 % yield). **<sup>1</sup>H NMR** (400 MHz, Chloroform-*d*)  $\delta$  4.37 - 4.30 (m, 1H), 3.02 - 2.68 (m, 2H), 1.88 - 1.72 (m, 2H), 1.58 - 1.51 (m, 1H), 1.46 - 1.34 (m, 2H), 1.32 - 1.26 (m, 13H), 0.90 - 0.86 (m, 3H). **<sup>13</sup>C NMR** (101 MHz, Chloroform-*d*)  $\delta$  41.8 (t, *J* = 21.0 Hz), 40.5, 32.1, 29.9, 29.72, 29.69, 29.53, 29.48, 28.7,



22.8, 21.1, 14.2. <sup>19</sup>F NMR (376 MHz, Chloroform-*d*) δ -80.9 (s, 3F), -111.4 – -115.0 (m, 2F), -121.8 (s, 2F), -122.9 (s, 2F), -123.7 (s, 2F), -126.2 (s, 2F). **HRMS** (ESI): *m/z* [M+Na]<sup>+</sup> calcd for C<sub>18</sub>H<sub>24</sub>F<sub>13</sub>INa<sup>+</sup>: 637.0607; found 637.0596.

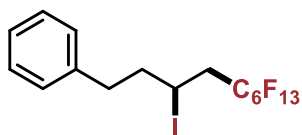

**(5-n-perfluorohexyl-3-iododecyl)benzene (12):** Following the general procedure A, the title product was obtained after purification by column chromatography (PE) as a transparent oil liquid (92 mg, 0.160 mmol, 80 % yield). <sup>1</sup>H NMR (400 MHz, Chloroform-*d*) δ 7.33 - 7.28 (m, 2H), 7.24 - 7.20 (m, 3H), 4.30 - 4.22 (m, 1H), 3.05 - 2.66 (m, 4H), 2.21 - 2.02 (m, 2H). <sup>13</sup>C NMR (101 MHz, Chloroform-*d*) δ 140.0, 128.8, 128.6, 126.5, 41.8 (t, *J* = 20.8 Hz), 41.6, 35.8, 20.3. <sup>19</sup>F NMR (376 MHz, Chloroform-*d*) δ -80.7 (s, 3F), -110.9 – -114.9 (m, 2F), -121.7 (s, 2F), -122.8 (s, 2F), -123.5 (s, 2F), -126.1 (s, 2F). **IR** (neat): 2926, 1233, 1188, 1142, 1121, 733, 697, 656 cm<sup>-1</sup>. **HRMS** (ESI): *m/z* [M+Na]<sup>+</sup> calcd for C<sub>15</sub>H<sub>10</sub>F<sub>13</sub>INa<sup>+</sup>: 602.94610; found 602.9456.

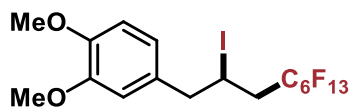

**1,2-dimethoxy-4-(n-perfluorohexyl-2-iodononyl)benzene (13):** Following the general procedure A, the title product was obtained after purification by column chromatography (PE/EA = 5:1) as a pale yellow solid (101.9 mg, 0.164 mmol, 82% yield). <sup>1</sup>H NMR (500 MHz, Chloroform-*d*) δ 6.83 (d, *J* = 8.2 Hz, 1H), 6.75 (dd, *J* = 8.2, 2.1 Hz, 1H), 6.71 (d, *J* = 2.1 Hz, 1H), 4.45 (dq, *J* = 8.3, 6.4 Hz, 1H), 3.894 (s, 3H), 3.885 (s, 3H), 3.27 – 3.13 (m, 2H), 2.98 – 2.77 (m, 2H). <sup>13</sup>C NMR (126 MHz, Chloroform-*d*) δ 149.0, 148.4, 131.1, 121.4, 112.1, 111.2, 55.99, 55.95, 46.8, 40.6 (t, *J* = 20.8 Hz), 19.9. <sup>19</sup>F NMR (376 MHz, Chloroform-*d*) δ -80.7 (s, 3F), -111.1 – -114.9 (m, 2F), -121.7 (s, 2F), -122.8 (s, 2F), -123.5 (s, 2F), -126.1 (s, 2F). **IR** (neat): 2958, 2839, 1518, 1233, 1188, 1140, 1073, 1022, 698, 653 cm<sup>-1</sup>. **HRMS** (ESI): *m/z* [M+Na]<sup>+</sup> calcd for C<sub>17</sub>H<sub>14</sub> O<sub>2</sub>F<sub>13</sub>INa<sup>+</sup>: 646.9723; found 646.9718. **Melting Point** (Experimental): 60 °C – 62 °C.

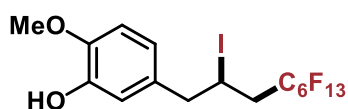

**2-methoxy-5-(3-n-perfluorohexane-2-iodononyl)phenol (14):** Following the general procedure A, the title product was obtained after purification by column chromatography (PE/EA =

5:1) as a white solid (85 mg, 0.140 mmol, 70% yield). **<sup>1</sup>H NMR** (500 MHz, Chloroform-*d*) δ 6.89 - 6.84 (m, 1H), 6.68 (d, *J* = 7.4 Hz, 2H), 5.56 (s, 1H), 4.44 - 4.39 (m, 1H), 3.89 (s, 3H), 3.11 - 3.21 (m, 2H), 2.92 - 2.75 (m, 2H). **<sup>13</sup>C NMR** (101 MHz, Chloroform-*d*) δ 146.6, 145.0, 130.5, 122.1, 114.6, 111.5, 56.1, 46.9, 40.6 (t, *J* = 20.8 Hz), 20.1. **<sup>19</sup>F NMR** (376 MHz, Chloroform-*d*) δ -80.6 (s, 3F), -111.0 - -114.6 (m, 2F), -121.7 (s, 2F), -122.8 (s, 2F), -123.5 (s, 2F), -126.0 (s, 2F). **IR** (neat): 2969, 1693, 1515, 1188, 1143, 698, 653 cm<sup>-1</sup>. **HRMS** (ESI): *m/z* [M+Na]<sup>+</sup> calcd for C<sub>16</sub>H<sub>12</sub>O<sub>2</sub>F<sub>13</sub>INa<sup>+</sup>: 632.9567; found 632.9548. **Melting Point** (Experimental): 58 °C - 59 °C.

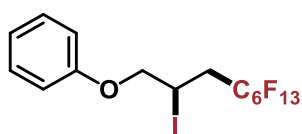

**(4-n-perfluorohexyl-2-iodobutoxy)benzene (15):** Following the general procedure A, the title product was obtained after purification by column chromatography (PE/EA = 20:1) as a transparent oil

liquid (103.2 mg, 0.178 mmol, 89% yield). **<sup>1</sup>H NMR** (500 MHz, Chloroform-*d*) δ 7.37 - 7.28 (m, 2H), 7.01 (tt, *J* = 7.4, 1.1 Hz, 1H), 6.94 - 6.88 (m, 2H), 4.56 - 4.48 (m, 1H), 4.30 (dd, *J* = 10.4, 4.9 Hz, 1H), 4.18 (dd, *J* = 10.4, 6.7 Hz, 1H), 3.13 - 3.25 (m, 1H), 2.90 - 2.71 (m, 1H). **<sup>13</sup>C NMR** (101 MHz, Chloroform-*d*) δ 157.8, 129.8, 122.0, 115.0, 72.8, 37.8 (t, *J* = 20.8 Hz), 12.9. **<sup>19</sup>F NMR** (471 MHz, Chloroform-*d*) δ -80.8 (t, *J* = 9.9 Hz, 3F), -111.9 - -114.2 (m, 2F), -121.6 - -121.8 (m, 2F), -122.8 - -122.9 (m, 2F), -123.1 - -123.9 (m, 2F), -126.1 - -126.2 (m, 2F). **IR** (neat): 2988, 1599, 1496, 1232, 1190, 1142, 752, 691 cm<sup>-1</sup>. **HRMS** (ESI): *m/z* [M+Na]<sup>+</sup> calcd for C<sub>16</sub>H<sub>13</sub>F<sub>13</sub>I<sup>+</sup>: 578.9849; found 578.9859.

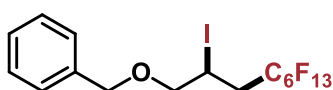

**(((4-n-perfluorohexyl-2-iodononyl)oxy)methyl)benzene (16):**

Following the general procedure A, the title product was obtained after purification by column chromatography (PE/EA = 20:1) as a pale yellow oil liquid (102 mg, 0.170 mmol, 86% yield). **<sup>1</sup>H NMR** (500 MHz, Chloroform-*d*) δ 7.34 (d, *J* = 151.5 Hz, 5H), 4.59 (d, *J* = 1.5 Hz, 2H), 4.40 - 4.33 (m, 1H), 3.78 - 3.63 (m, 2H), 3.17 - 3.01 (m, 1H), 2.77 - 2.60 (m, 1H). **<sup>13</sup>C NMR** (101 MHz, Chloroform-*d*) δ 140.0, 128.8, 128.6, 126.5, 41.9, 41.8 (t, *J* = 20.8 Hz), 35.8, 20.3. **<sup>19</sup>F NMR** (376 MHz, Chloroform-*d*) δ -80.7 (s, 3F), -110.3 - -115.1 (m, 2F), -121.7 (s, 2F), -122.8 (s, 2F), -123.5 (s, 2F), -126.0 (s, 2F). **IR** (neat): 2865, 1233, 1190, 1142, 1073, 734, 697, 656 cm<sup>-1</sup>. **HRMS** (ESI): *m/z* [M+Na]<sup>+</sup> calcd for C<sub>16</sub>H<sub>12</sub>O<sub>2</sub>F<sub>13</sub>INa<sup>+</sup>: 616.9617<sup>+</sup>; found 616.9606.

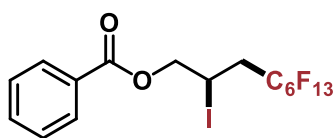

**4-n-perfluorohexyl-2-iodononyl benzoate (17):** Following the general procedure A, the title product was obtained after purification by column chromatography (PE/EA = 20:1) as a white solid (110 mg, 0.180 mmol, 90% yield).  $^1\text{H NMR}$  (400 MHz, Chloroform-*d*)  $\delta$  8.11 - 8.04 (m, 2H), 7.66 - 7.57 (m, 1H), 7.53 - 7.44 (m, 2H), 4.66 - 4.50 (m, 3H), 3.13 - 2.81 (m, 2H).  $^{13}\text{C NMR}$  (126 MHz, Chloroform-*d*)  $\delta$  165.7, 133.7, 129.9, 129.4, 128.7, 68.9, 38.6 (t,  $J$  = 20.8 Hz), 12.2.  $^{19}\text{F NMR}$  (376 MHz, Chloroform-*d*)  $\delta$  -80.7 (s, 3F), -111.6 - -114.7 (m, 2F), -121.7 (s, 2F), -122.8 (s, 2F), -123.4 (s, 2F), -126.0 (d,  $J$  = 11.9 Hz, 2F). **IR** (neat): 2973, 2902, 1727, 1265, 1231, 1140, 1115, 1025, 698, 653, 567, 530, 405  $\text{cm}^{-1}$ . **HRMS** (ESI):  $m/z$   $[\text{M}+\text{Na}]^+$  calcd for  $\text{C}_{16}\text{H}_{10}\text{O}_2\text{F}_{13}\text{INa}^+$ : 630.9410; found 630.9410. **Melting Point** (Experimental): 40  $^\circ\text{C}$  - 42  $^\circ\text{C}$ .

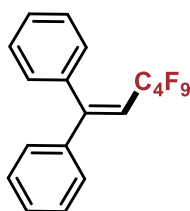

**(3,3,4,4,5,5,6,6,6-Nonafluorohex-1-ene-1,1-diyl)dibenzene (18):** Following the general procedure A, the title product was obtained after purification by column chromatography (PE) as a transparent oil liquid (55 mg, 0.138 mmol, 69% yield).  $^1\text{H NMR}$  (400 MHz, Chloroform-*d*)  $\delta$  7.5 - 7.3 (m, 7H), 7.3 - 7.2 (m, 3H), 6.1 (t,  $J$  = 14.9 Hz, 1H).  $^{13}\text{C NMR}$  (101 MHz, Chloroform-*d*)  $\delta$  154.4, 140.8, 137.6, 129.7, 129.1, 128.6, 128.5, 128.1, 128.0, 112.7 (t,  $J$  = 20.7 Hz).  $^{19}\text{F NMR}$  (376 MHz, Chloroform-*d*)  $\delta$  -80.9 (s, 3F), -103.7 (s, 2F), -123.8 (s, 2F), -125.6 (s, 2F). **IR** (neat): 3061, 2987, 2901, 1353, 1229, 1129, 1027, 878, 773, 695, 590  $\text{cm}^{-1}$ . These data are in agreement with those reported previously in the literature.<sup>7</sup>

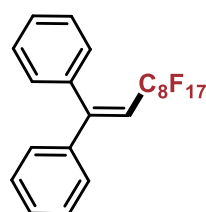

**(3-n-perfluorooctane -1-ene-1,1-diyl)dibenzene (19):** Following the general procedure A, the title product was obtained after purification by column chromatography (PE) as a white solid (77 mg, 0.129 mmol, 65% yield).  $^1\text{H NMR}$  (400 MHz, Chloroform-*d*)  $\delta$  7.41 - 7.30 (m, 7H), 7.25 - 7.21 (m, 3H), 6.09 (t,  $J$  = 14.7 Hz, 1H).  $^{13}\text{C NMR}$  (101 MHz, Chloroform-*d*)  $\delta$  154.5, 140.9, 137.6, 129.7, 129.2, 128.7, 128.5, 128.1, 128.0, 112.9 (t,  $J$  = 21.2 Hz).  $^{19}\text{F NMR}$  (376 MHz, Chloroform-*d*)  $\delta$  -80.8 (s, 3F), -103.5 (s, 2F), -121.3 (s, 2F), -121.9 (s, 4F), -122.7 (s, 2F), -122.9 (s, 2F), -126.1 (s, 2F). **IR** (neat): 2969, 1195, 1143, 1099, 977, 695, 652, 558  $\text{cm}^{-1}$ . **HRMS** (ESI):  $m/z$   $[\text{M}+\text{H}]^+$  calcd for  $\text{C}_{22}\text{H}_{12}\text{F}_{17}^+$ : 599.0662; found 599.0649.

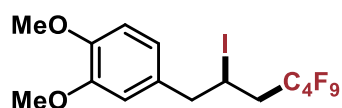

**1,2-dimethoxy-4-(n-perfluorobutane-2-iodononyl)benzene**

**(20):** Following the general procedure A, the title product was obtained after purification by column chromatography (PE/EA = 5:1) as a transparent oil liquid (81 mg, 0.155 mmol, 77% yield). **<sup>1</sup>H NMR** (400 MHz, Chloroform-*d*)  $\delta$  6.84 (d,  $J$  = 8.2 Hz, 1H), 6.75 (dd,  $J$  = 8.1, 2.2 Hz, 1H), 6.71 (d,  $J$  = 2.2 Hz, 1H), 4.48 – 4.41 (m, 1H), 3.89 (s, 3H), 3.89 (s, 3H), 3.25 - 3.13 (m, 2H), 2.96 - 2.78 (m, 2H). **<sup>13</sup>C NMR** (101 MHz, Chloroform-*d*)  $\delta$  149.0, 148.4, 131.1, 121.4, 112.1, 111.2, 56.0, 56.0, 46.8, 40.5 (t,  $J$  = 20.7 Hz), 19.8. **<sup>19</sup>F NMR** (376 MHz, Chloroform-*d*)  $\delta$  -80.9 (s, 3F), -111.6 – -114.7 (m, 2F), -124.5 (s, 2F), -125.8 (s, 2F). **IR** (neat): 2959, 2838, 1517, 1349, 1215, 1130, 1027, 879, 804, 720, 533, 465  $\text{cm}^{-1}$ . **HRMS** (ESI):  $m/z$  [M+Na]<sup>+</sup> calcd for C<sub>15</sub>H<sub>14</sub>F<sub>9</sub>INa<sup>+</sup>: 546.9787; found 546.9774.

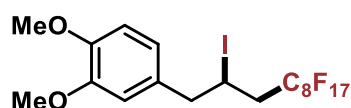

**1,2-dimethoxy-4-(n-perfluorooctane-2-iodononyl)benzene**

**(21):** Following the general procedure A, the title product was obtained after purification by column chromatography (PE/EA = 5:1) as a white solid (88 mg, 0.122 mmol, 61% yield). **<sup>1</sup>H NMR** (400 MHz, Chloroform-*d*)  $\delta$  6.84 (d,  $J$  = 8.2 Hz, 1H), 6.75 (dd,  $J$  = 8.1, 2.1 Hz, 1H), 6.71 (d,  $J$  = 2.1 Hz, 1H), 4.52 - 4.39 (m, 1H), 3.90 (s, 3H), 3.89 (s, 3H), 3.25 - 3.13 (m, 2H), 2.94 - 2.79 (m, 2H). **<sup>13</sup>C NMR** (101 MHz, Chloroform-*d*)  $\delta$  149.0, 148.3, 131.1, 121.3, 112.1, 111.1, 55.9, 55.9, 46.7, 40.6 (t,  $J$  = 21.0 Hz), 19.8. **<sup>19</sup>F NMR** (376 MHz, Chloroform-*d*)  $\delta$  -80.7 (s, 3F), -111.5 – -114.5 (m, 2F), -121.5 (s, 2F), -121.8 (s, 4F), -122.6 (s, 2F), -123.5 (s, 2F), -126.0 (s, 2F). **IR** (neat): 2958, 2921, 2851, 1519, 1238, 1198, 1143, 1116, 1022, 657, 560, 530, 505  $\text{cm}^{-1}$ . **HRMS** (ESI):  $m/z$  [M+Na]<sup>+</sup> calcd for C<sub>19</sub>H<sub>14</sub>O<sub>2</sub>F<sub>17</sub>INa: 746.9659<sup>+</sup>; found 746.9651. **Melting Point** (Experimental): 91 °C – 93 °C.

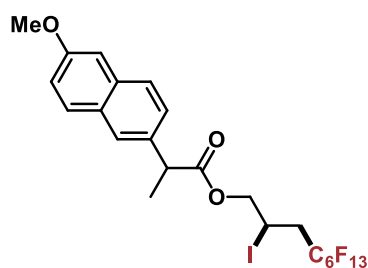

**4-n-perfluorohexyl-2-iodononyl 2-(6-methoxynaphthalen-**

**2-yl)propanoate (22):** Following the general procedure A, the title product was obtained after purification by column chromatography (PE/EA = 5:1) as a white solid (123 mg, 0.171 mmol, 86% yield, dr = 1:1). **<sup>1</sup>H NMR** (400 MHz, Chloroform-*d*)  $\delta$

7.81 - 7.59 (m, 3H), 7.41 - 7.37 (m, 1H), 7.15 - 7.09 (m, 2H), 4.47 - 4.17 (m, 3H), 3.95 - 3.87 (m, 4H), 2.85 - 2.44 (m, 2H), 1.64 - 1.61 (dd,  $J = 7.2, 2.7$  Hz, 3H).  $^{13}\text{C}$  NMR (101 MHz, Chloroform-*d*)  $\delta$  173.8, 173.7, 157.9, 135.0, 134.96, 134.0, 129.4, 129.3, 129.1, 127.5, 127.4, 126.3, 126.2, 126.15, 119.3, 105.7, 105.7, 68.6, 55.4, 55.3, 45.5, 45.47, 37.9 ( $t, J = 21.0$  Hz), 37.8 ( $t, J = 20.9$  Hz), 18.2, 18.16, 11.8, 11.7.  $^{19}\text{F}$  NMR (376 MHz, Chloroform-*d*)  $\delta$  -80.7 (s, 3F), -105.1 - -120.2 (m, 2F), -121.8 (s, 2F), -122.8 (s, 2F), -123.6 (s, 2F), -126.1 (s, 2F). IR (neat): 2971, 1633, 1606, 1228, 1139, 1034, 815, 790, 696, 652, 529, 475  $\text{cm}^{-1}$  HRMS (ESI):  $m/z$   $[\text{M}+\text{Na}]^+$  calcd for  $\text{C}_{17}\text{H}_{14}\text{F}_{13}\text{INa}^+$ : 738.9985; found 738.9984.

**Melting Point** (Experimental): 95 °C - 97 °C.

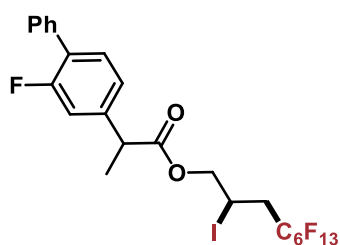

**4-n-perfluorohexyl-2-iodononyl 2-(2-fluoro-[1,1'-biphenyl]-4-yl)propanoate (23):** Following the general procedure A, the title product was obtained after purification by column chromatography (PE/EA = 10:1) as a pale yellow solid (121 mg, 0.166 mmol, 83% yield).  $^1\text{H}$  NMR (400 MHz, Chloroform-*d*)  $\delta$  7.53

- 7.49 (m, 2H), 7.46 - 7.31 (m, 4H), 7.19 - 7.09 (m, 2H), 4.47 - 4.23 (m, 3H), 3.84 - 3.78 (m, 1H), 2.88 - 2.57 (m, 2H), 1.59 - 1.56 (m, 3H).  $^{13}\text{C}$  NMR (101 MHz, Chloroform-*d*)  $\delta$  173.1, 161.1, 158.6, 141.2 (d,  $J = 4.4$  Hz), 141.1 (d,  $J = 4.4$  Hz), 135.5, 131.0, 129.0, 128.58, 128.56, 127.9, 123.8 (d,  $J = 3.4$  Hz), 123.7 (d,  $J = 3.4$  Hz), 115.6 (d,  $J = 5.8$  Hz), 115.4 (d,  $J = 5.8$  Hz), 68.8, 45.1, 38.1 ( $t, J = 20.8$  Hz), 38.0 ( $t, J = 20.8$  Hz), 18.1, 11.7, 11.6.  $^{19}\text{F}$  NMR (376 MHz, Chloroform-*d*)  $\delta$  -80.7 (s, 3F), -112.1 - -115.6 (m, 2F), -117.4 (s, 1F), -121.7 (s, 2F), -122.8 (s, 2F), -123.5 (s, 2F), -126.1 (s, 2F). IR (neat): 2977, 1734, 1483, 1420, 1232, 1141, 765, 695, 657, 516  $\text{cm}^{-1}$ . HRMS (ESI):  $m/z$   $[\text{M}+\text{Na}]^+$  calcd for  $\text{C}_{24}\text{H}_{17}\text{F}_{13}\text{INa}^+$ : 752.9942; found 752.9930. **Melting Point** (Experimental): 56 °C - 58 °C.

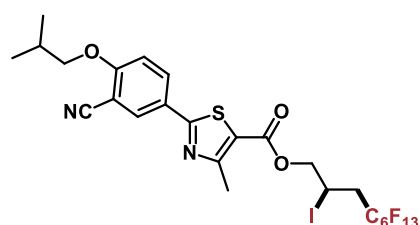

**4-n-perfluorohexyl-2-iodononyl 2-(3-cyano-4-isobutoxyphenyl)-4-methylthiazole-5-carboxylate (24):** Following the general procedure A, the title product was obtained after purification by column chromatography (PE/EA = 5:1) as a white solid (143 mg, 0.179 mmol, 89% yield, dr = 1:1).  $^1\text{H}$  NMR (400 MHz, Chloroform-*d*)  $\delta$  8.20 (d,  $J = 2.3$  Hz, 1H), 8.11 (dd,  $J = 8.9, 2.3$  Hz, 1H), 7.02 (d,  $J = 8.9$  Hz,

1H), 4.59 - 4.51 (m, 3H), 3.91 (d,  $J = 6.5$  Hz, 2H), 3.10 - 2.81 (m, 2H), 2.79 (s, 3H), 2.32 - 2.13 (m, 1H), 1.10 (d,  $J = 6.7$  Hz, 6H).  $^{13}\text{C NMR}$  (101 MHz, Chloroform- $d$ )  $\delta$  168.2, 162.8, 162.5, 161.1, 132.8, 132.4, 125.9, 120.7, 115.5, 112.8, 103.2, 75.9, 69.1, 38.6 (t,  $J = 20.7$  Hz), 28.3, 19.2, 17.8, 11.8.  $^{19}\text{F NMR}$  (376 MHz, Chloroform- $d$ )  $\delta$  -80.7 (s, 3F), -111.1 - -115.2 (m, 2F), -121.6 (s, 2F), -122.7 (s, 2F), -123.3 (s, 2F), -126.0 (s, 2F). **IR** (neat): 1694, 1606, 1339, 1228, 1187, 1111, 829, 698, 653  $\text{cm}^{-1}$ . **HRMS** (ESI):  $m/z$   $[\text{M}+\text{Na}]^+$  calcd for  $\text{C}_{17}\text{H}_{14}\text{F}_{13}\text{INa}^+$ : 824.9924; found 824.9905. **Melting Point** (Experimental): 113  $^{\circ}\text{C}$  - 115  $^{\circ}\text{C}$ .

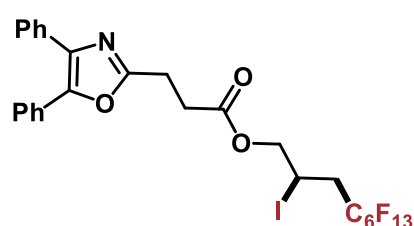

**4-n-perfluorohexyl-2-iodononyl**

**3-(4,5-**

**diphenyloxazol-2-yl)propanoate (25):** Following the general procedure A, the title product was obtained after purification by column chromatography (PE/EA = 5:1) as a

pale yellow solid (141 mg, 0.181 mmol, 90% yield).  $^1\text{H NMR}$  (400 MHz, Chloroform- $d$ )  $\delta$  7.66 - 7.60 (m, 2H), 7.59 - 7.54 (m, 2H), 7.40 - 7.28 (m, 6H), 4.48 - 4.32 (m, 3H), 3.22 (t,  $J = 7.6$  Hz, 2H), 3.01 (t,  $J = 7.6$  Hz, 2H), 2.97 - 2.69 (m, 2H).  $^{13}\text{C NMR}$  (101 MHz, Chloroform- $d$ )  $\delta$  171.2, 161.5, 145.7, 135.3, 132.5, 129.1, 128.8, 128.70, 128.65, 128.2, 128.0, 126.6, 68.8, 38.3 (t,  $J = 21.2$  Hz), 31.0, 23.5, 12.0.  $^{19}\text{F NMR}$  (471 MHz, Chloroform- $d$ )  $\delta$  -80.7 (t,  $J = 9.9$  Hz, 3F), -109.2 - -116.4 (m, 2F), -121.5 - -121.8 (m, 2F), -122.7 (q,  $J = 12.4$  Hz, 2F), -123.2 - -123.6 (m, 2F), -126.0 (dd,  $J = 15.4, 9.9$  Hz, 2F). **IR** (neat): 2988, 2902, 1738, 1607, 1594, 1360, 1326, 1238, 1175, 1142, 694, 600, 504  $\text{cm}^{-1}$ . **HRMS** (ESI):  $m/z$   $[\text{M}+\text{K}]^+$  calcd for  $\text{C}_{27}\text{H}_{19}\text{O}_3\text{NF}_{13}\text{IK}^+$ : 817.9834; found 817.9825. **Melting Point** (Experimental): 72  $^{\circ}\text{C}$  - 73  $^{\circ}\text{C}$ .

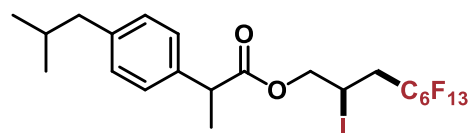

**4-n-perfluorohexyl-2-iodononyl**

**2-(4-**

**isobutylphenyl)propanoate (26):** Following the general procedure A, the title product was obtained

after purification by column chromatography (PE/EA = 10:1) as a white solid (120 mg, 0.173 mmol, 87% yield, dr = 1:1).  $^1\text{H NMR}$  (400 MHz, Chloroform- $d$ )  $\delta$  7.23 - 7.18 (m, 2H), 7.10 - 7.08 (m, 2H), 4.47 - 4.15 (m, 3H), 3.78 - 3.71 (m, 1H), 2.91 - 2.50 (m, 2H), 2.45 - 2.42 (m, 2H), 1.88 - 1.78 (m, 1H), 1.54 - 1.52 (m, 3H), 0.89 - 0.88 (m, 6H).  $^{13}\text{C NMR}$  (101 MHz, Chloroform- $d$ )  $\delta$  173.9, 173.8, 141.0,

137.13, 137.07, 129.6, 127.4, 127.3, 68.5, 45.2, 45.13, 45.11, 45.09, 37.9 (t,  $J = 21.5$  Hz), 37.7 (t,  $J = 21.8$  Hz), 30.3, 30.28, 22.4, 18.2, 11.8, 11.7.  $^{19}\text{F}$  NMR (376 MHz, Chloroform- $d$ )  $\delta$  -80.67 (s, 3F), -111.4 – -115.8 (m, 2F), -121.7 (s, 2F), -122.8 (s, 2F), -123.5 (s, 2F), -126.0 (s, 2F). IR (neat): 2966, 2932, 2873, 1732, 1232, 1140, 1071, 695, 652, 567, 547, 530, 505  $\text{cm}^{-1}$ . HRMS (ESI):  $m/z$   $[\text{M}+\text{K}]^+$  calcd for  $\text{C}_{22}\text{H}_{22}\text{O}_2\text{F}_{13}\text{K}^+$ : 731.0089; found 731.0083. Melting Point (Experimental): 45 °C – 46 °C.

## 5. Mechanism Studies

### 5.1 UV/Vis absorption spectrometry

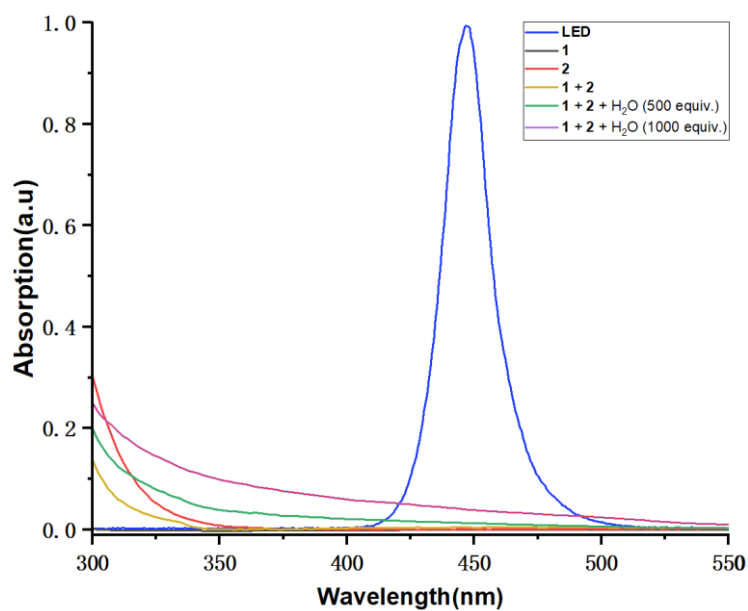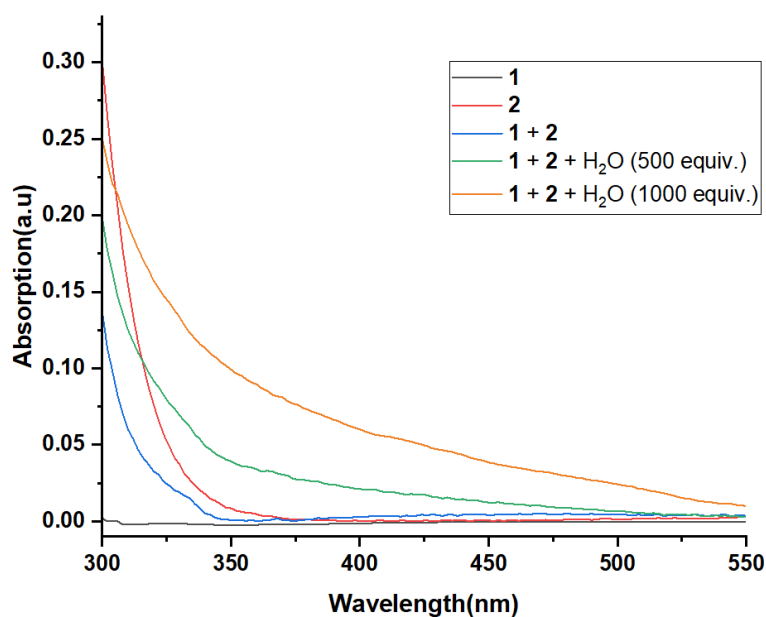

**Figure S1:** UV/vis spectrum of blue LED, **1**, **2**, **1+2+H<sub>2</sub>O** (500 equiv.) and **1+2+H<sub>2</sub>O** (1000 equiv.), [1] = 10<sup>-4</sup> M, [2] = 2\*10<sup>-4</sup> M, [water] = 0.05 M (500 equiv.);0.1 M (1000 equiv.) in toluene.

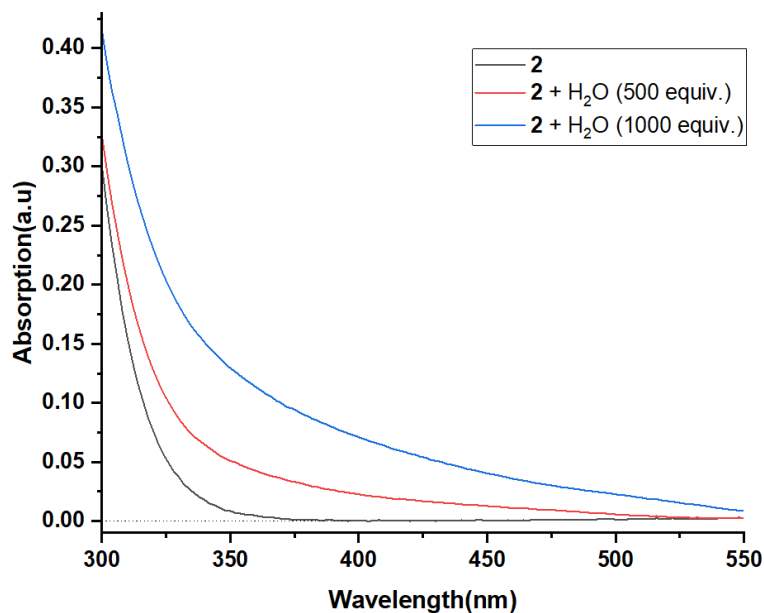

**Figure S2:** UV/vis spectrum of **2**, **2+H<sub>2</sub>O** (500 equiv.) and **2+H<sub>2</sub>O** (1000 equiv.), [2] = 1\*10<sup>-4</sup> M, [water] = 0.05 M (500 equiv.);0.1 M (1000 equiv.) in toluene.

## 5.2 Determination of binding stoichiometry of halogen bond complex

The binding stoichiometry between C<sub>6</sub>F<sub>13</sub>I and halogen bond acceptors (XB acceptor: H<sub>2</sub>O) were evaluated using Job's plot analysis<sup>8</sup>: <sup>19</sup>F NMR spectra of ten samples of mixtures of C<sub>6</sub>F<sub>13</sub>I and XB acceptor in CD<sub>3</sub>CN were recorded at 298 K. Trifluoroluorobenzene ( $\delta$  F-Ph = -63.7200) was used as internal standard. The total volume of the mixture was 0.6 mL, and the total amount of C<sub>6</sub>F<sub>13</sub>I and halogen bond acceptor was kept constant at 0.3 mmol (0.5 M), while the amount of C<sub>6</sub>F<sub>13</sub>I was varied from 0 to 0.3 mmol (0-0.5 M). The molar ratios of C<sub>6</sub>F<sub>13</sub>I/(C<sub>6</sub>F<sub>13</sub>I + H<sub>2</sub>O) were 0.0, 0.07, 0.24, 0.35, 0.44, 0.56, 0.63, 0.81, 0.91, 1.0. <sup>19</sup>F NMR for each sample was recorded and the chemical shifts differences ( $\Delta\delta$ ) for -CF<sub>2</sub>I were used to draw the plot. The stoichiometry was determined by plotting ratios of [C<sub>6</sub>F<sub>13</sub>I] ×  $\Delta\delta$  against ratios of [C<sub>6</sub>F<sub>13</sub>I] / [C<sub>6</sub>F<sub>13</sub>I + H<sub>2</sub>O] to afford a maximum at ratio [C<sub>6</sub>F<sub>13</sub>I] / [C<sub>6</sub>F<sub>13</sub>I + H<sub>2</sub>O] = 0.5, which meant a 1:1 complex ratio between C<sub>6</sub>F<sub>13</sub>I and H<sub>2</sub>O (Figure



S3).

|    | [C <sub>6</sub> F <sub>13</sub> I] (M) | Δδ (ppm) | [C <sub>6</sub> F <sub>13</sub> I]/[C <sub>6</sub> F <sub>13</sub> I+H <sub>2</sub> O] | [C <sub>6</sub> F <sub>13</sub> I]×Δδ (M.ppm) |
|----|----------------------------------------|----------|----------------------------------------------------------------------------------------|-----------------------------------------------|
| 1  | 0.50                                   | 0        | 1.00                                                                                   | 0                                             |
| 2  | 0.45                                   | 0.032    | 0.91                                                                                   | 0.0147                                        |
| 3  | 0.41                                   | 0.060    | 0.81                                                                                   | 0.0244                                        |
| 4  | 0.31                                   | 0.122    | 0.63                                                                                   | 0.0385                                        |
| 5  | 0.28                                   | 0.149    | 0.56                                                                                   | 0.0414                                        |
| 6  | 0.22                                   | 0.187    | 0.44                                                                                   | 0.0416                                        |
| 7  | 0.18                                   | 0.202    | 0.35                                                                                   | 0.0356                                        |
| 8  | 0.12                                   | 0.237    | 0.24                                                                                   | 0.0285                                        |
| 9  | 0.04                                   | 0.273    | 0.07                                                                                   | 0.0101                                        |
| 10 | 0                                      | 0        | 0                                                                                      | 0                                             |

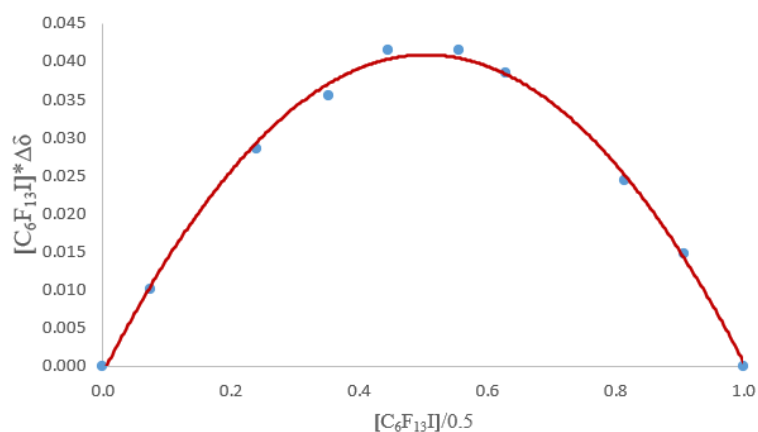

**Figure S3**

$$y = -0.1645x^2 + 0.1659x - 0.0009, x_{\max} = 0.1659/(-2 \times (-0.1645)) = 0.50$$

### 5.3 Determination of the association constant ( $K_{EDA}$ )

The association constant ( $K_{EDA}$ ) was calculated using Hanna and Ashbaugh's<sup>9-12</sup>. <sup>19</sup>F NMR spectra of eight samples of mixtures of C<sub>6</sub>F<sub>13</sub>I and H<sub>2</sub>O in CD<sub>3</sub>CN were recorded at 298 K (trifluorolobenzene (δ F-Ph = -63.7200) was used as internal standard). The total volume of the mixture was 0.6 mL, the amount of C<sub>6</sub>F<sub>13</sub>I was kept constant at 0.03 mmol (13.37 mg), while that

of H<sub>2</sub>O was varied from 0.03 to 1.2 mmol. <sup>19</sup>F NMR for each sample was recorded and the chemical shifts differences ( $\Delta\delta$ ) for -CF<sub>2</sub>I were used to draw the plot.

|   | H <sub>2</sub> O (mol/L) | 1/[H <sub>2</sub> O] (L/mol) | $\Delta\delta$ (ppm) | 1/ $\Delta\delta$ (1/ppm) |
|---|--------------------------|------------------------------|----------------------|---------------------------|
| 1 | 0.06                     | 15.43                        | 0.012                | 83.3333                   |
| 2 | 0.10                     | 9.82                         | 0.020                | 50.0000                   |
| 3 | 0.20                     | 4.91                         | 0.035                | 28.8184                   |
| 4 | 0.25                     | 4.00                         | 0.038                | 26.1097                   |
| 5 | 0.32                     | 3.09                         | 0.054                | 18.6220                   |
| 6 | 0.54                     | 1.86                         | 0.089                | 11.2108                   |
| 7 | 0.98                     | 1.02                         | 0.142                | 7.0175                    |
| 8 | 1.98                     | 0.50                         | 0.271                | 3.6846                    |

According to equation 1, the equilibrium constant  $K_{EDA}$  ( $K_{EDA} = (1/\Delta_0) / (1/k\Delta_0) = 2.2204/5.1944 = 0.43$ ) was readily obtained from the plot (Figure S4).

$$\frac{1}{\Delta} = \frac{1}{K\Delta_0 [LB]} + \frac{1}{\Delta_0} \quad \text{Equation 1}$$

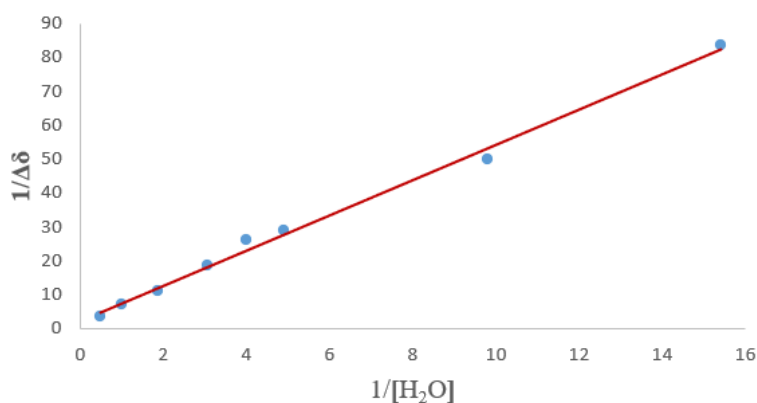

Figure S4

## 5.4 Photolysis reaction

*procedure A*

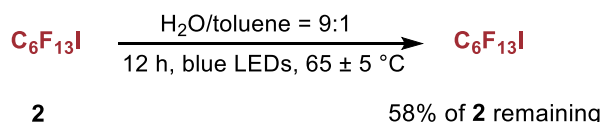

To a dry sample flask equipped with a stirring bar, the perfluoroalkyl iodide (0.4 mmol) was added. The tube was evacuated and filled with nitrogen (three times). After the addition of toluene (0.05 mL) and H<sub>2</sub>O (0.45 mL) to the mixture via gas-tight syringe, the mixture was stirred overnight at

about 65 °C via a 50W blue LED (450 nm) lamp. (Trifluoromethyl)benzene (24 μL, 0.2 mmol) was added and the mixture was analyzed by  $^{19}\text{F}$  NMR spectroscopy. There is 58% of perfluoro iodine remaining. (Figure S5a).

*procedure B*

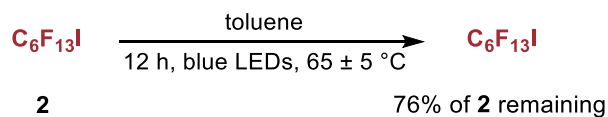

To a dry sample flask equipped with a stirring bar, the perfluoroalkyl iodide (0.4 mmol) was added. The tube was evacuated and filled with nitrogen (three times). After the addition of toluene (0.5 mL) to the mixture via gastight syringe, the mixture was stirred overnight at about 65 °C via a 50W blue LED (450 nm) lamp. (Trifluoromethyl)benzene (24 μL, 0.2 mmol) was added and the mixture was analyzed by  $^{19}\text{F}$  NMR spectroscopy. There is 76% of perfluoro iodine remaining (Figure S5b).

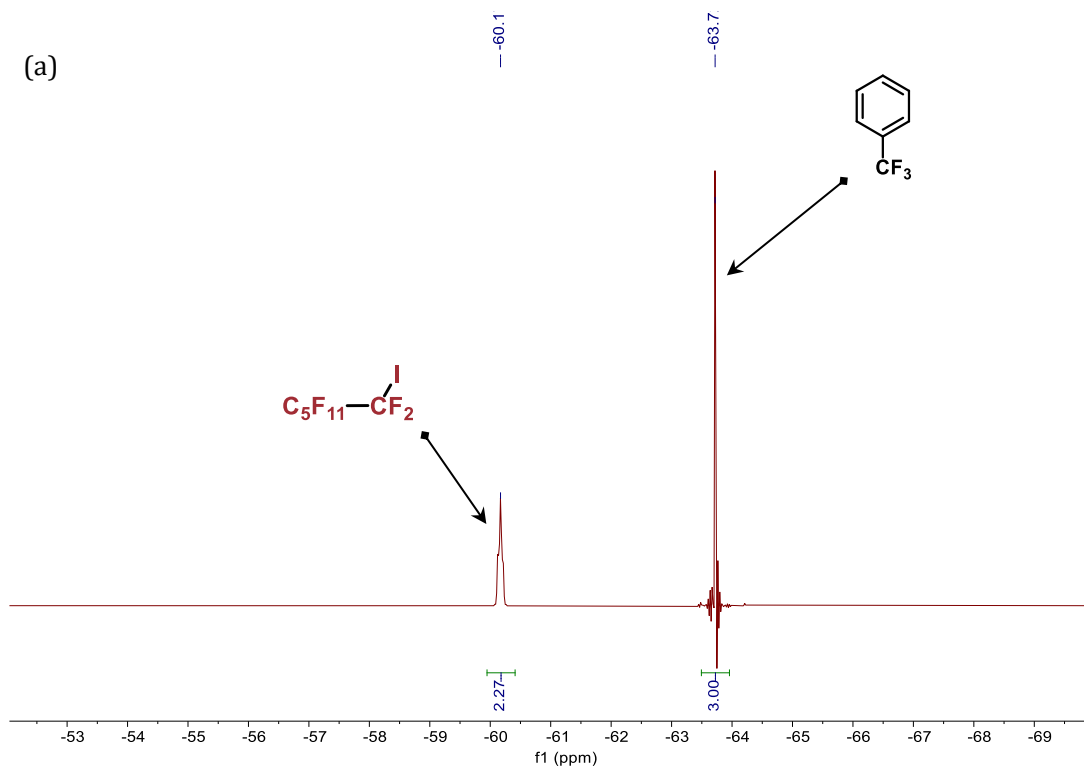

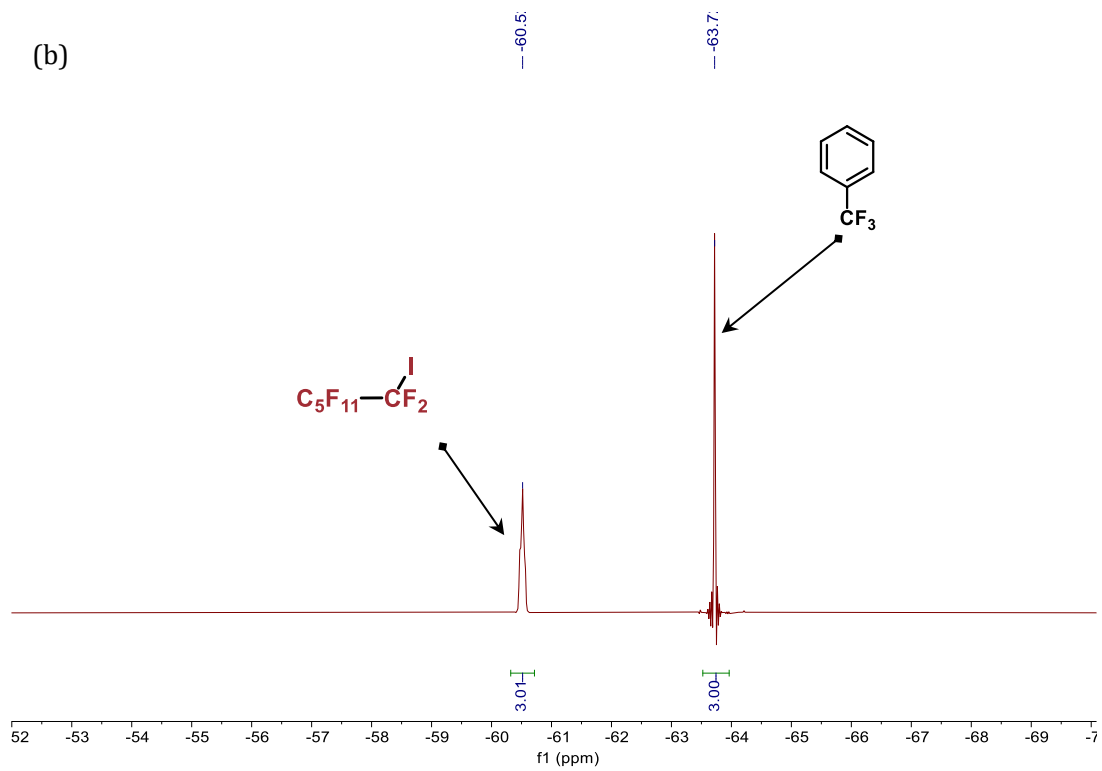

Figure S5.

## 5.5 Light On-Off Experiments

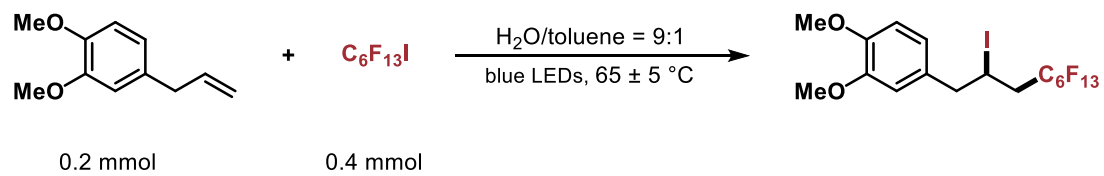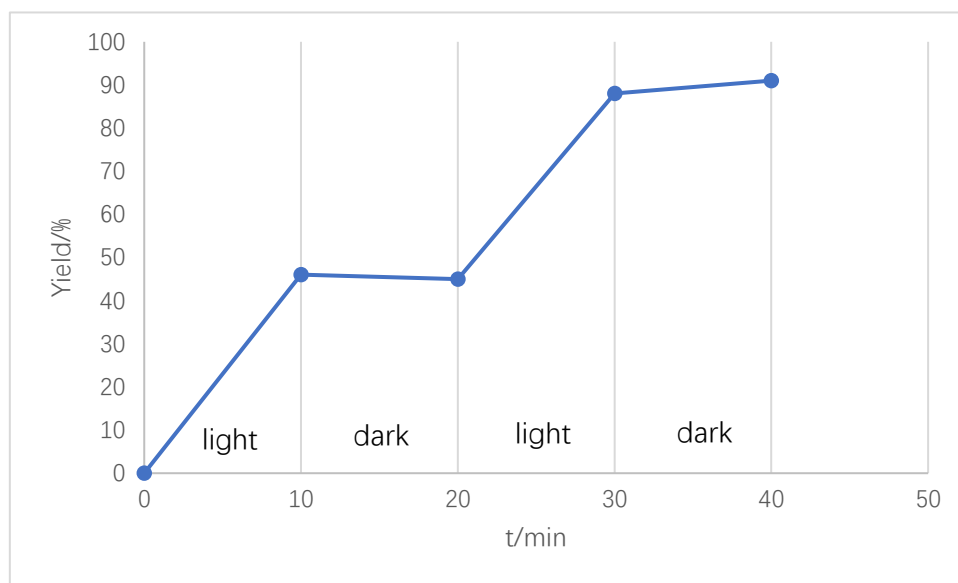

**Figure S6.** The yield was determined by <sup>1</sup>H NMR using 1,1,2,2-Tetrachloroethane as an external standard.

## 6. NMR Spectra

$^1\text{H}$  NMR of compound **3** (500 MHz in  $\text{CDCl}_3$ )

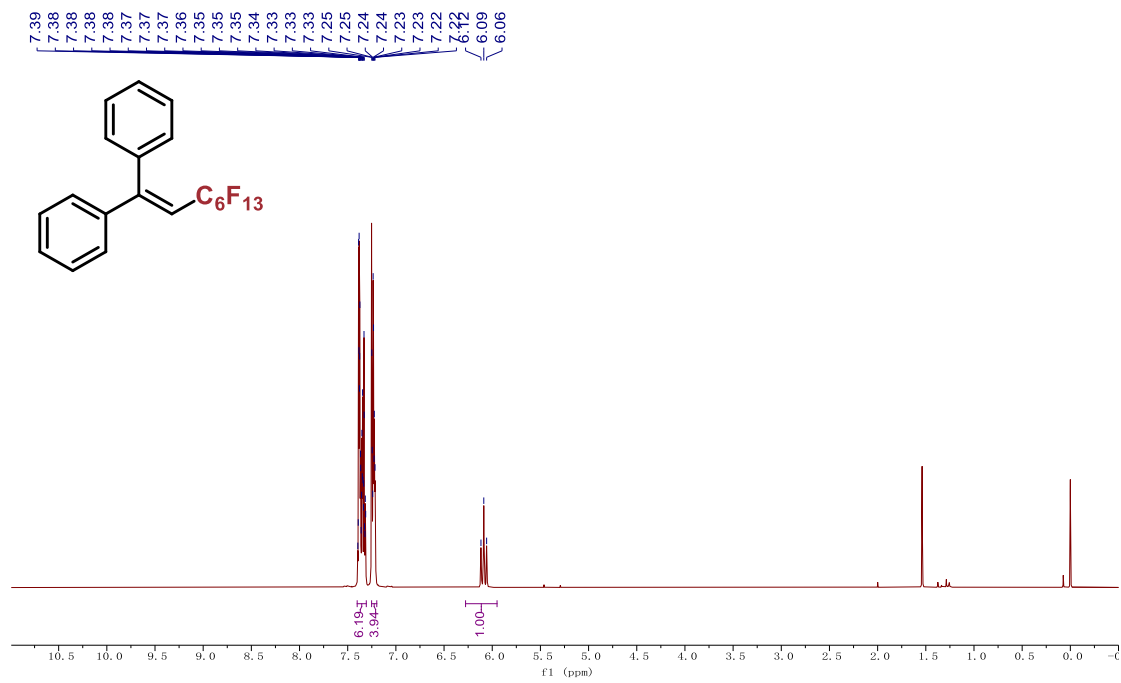

$^{13}\text{C}$  NMR of compound **3** (126 MHz in  $\text{CDCl}_3$ )

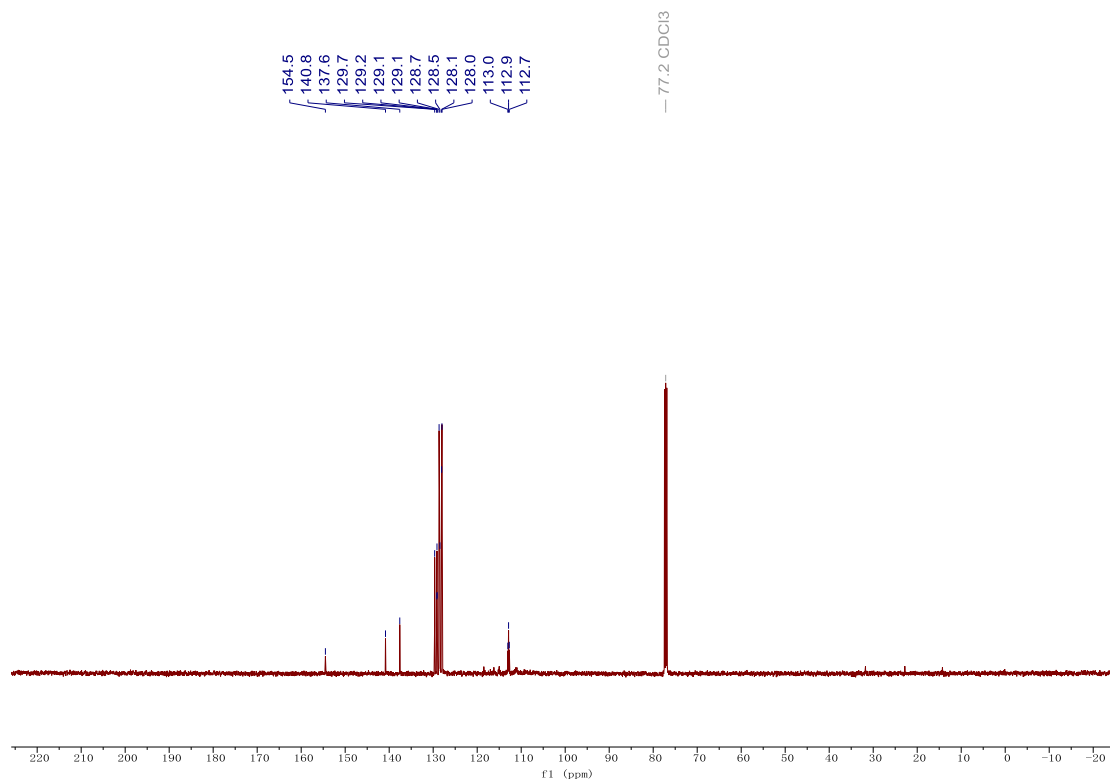



**<sup>19</sup>F NMR of compound 3 (376 MHz in CDCl<sub>3</sub>)**

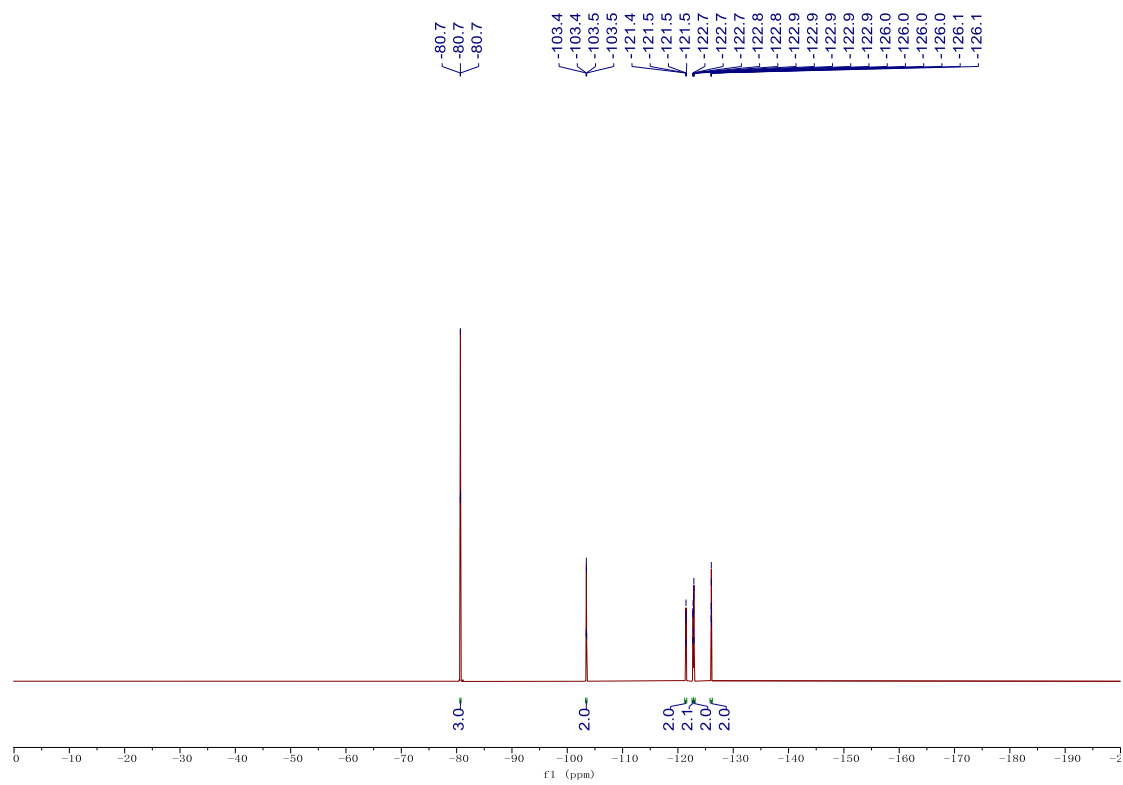



$^1\text{H}$  NMR of compound 4 (500 MHz in  $\text{CDCl}_3$ )

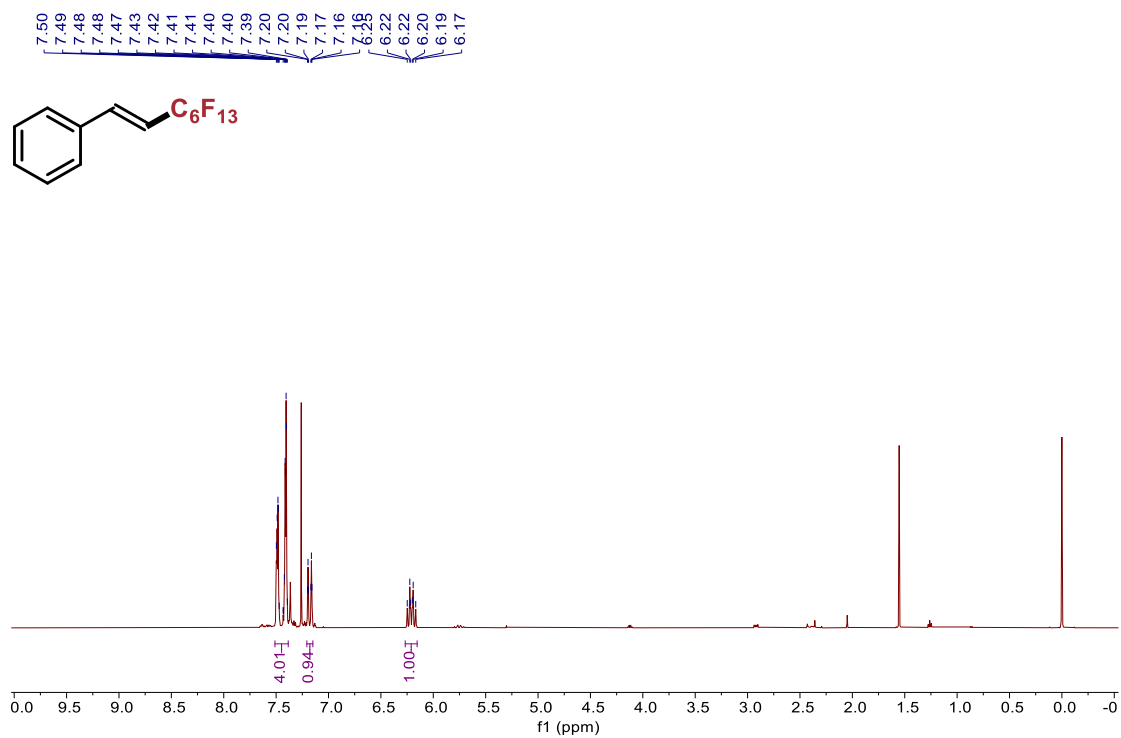

$^{13}\text{C}$  NMR of compound 4 (126 MHz in  $\text{CDCl}_3$ )

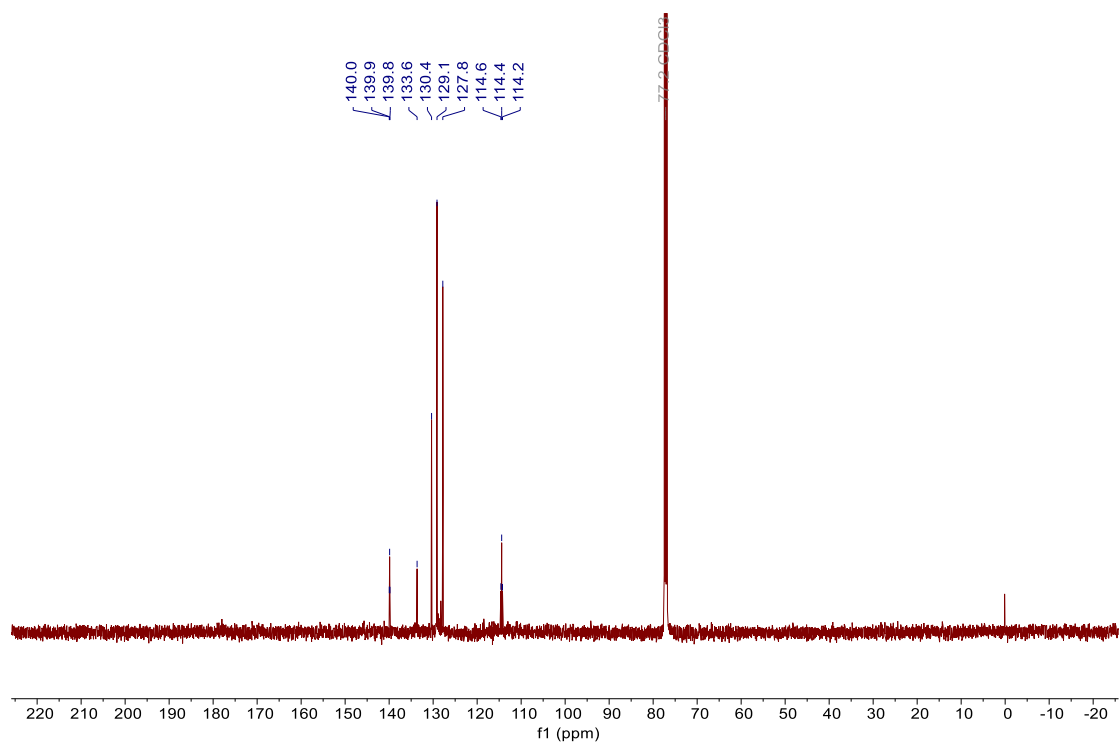

<sup>13</sup>F NMR of compound 4 (376 MHz in CDCl<sub>3</sub>)

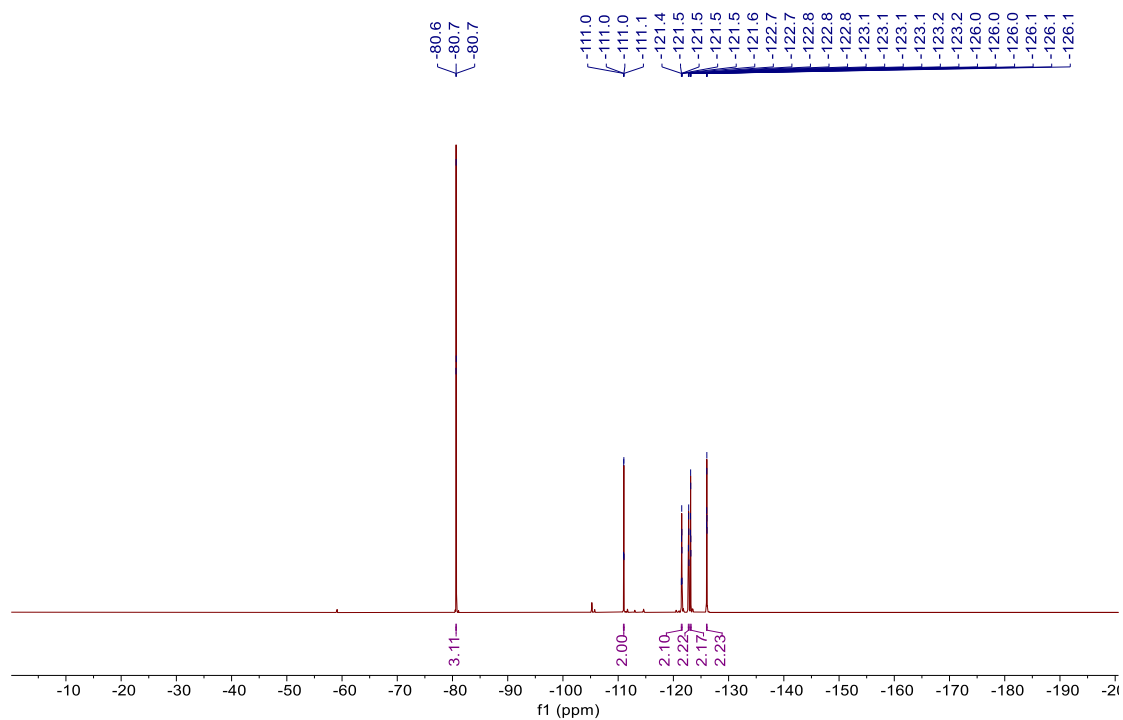

$^1\text{H}$  NMR of compound **5** (500 MHz in  $\text{CDCl}_3$ )

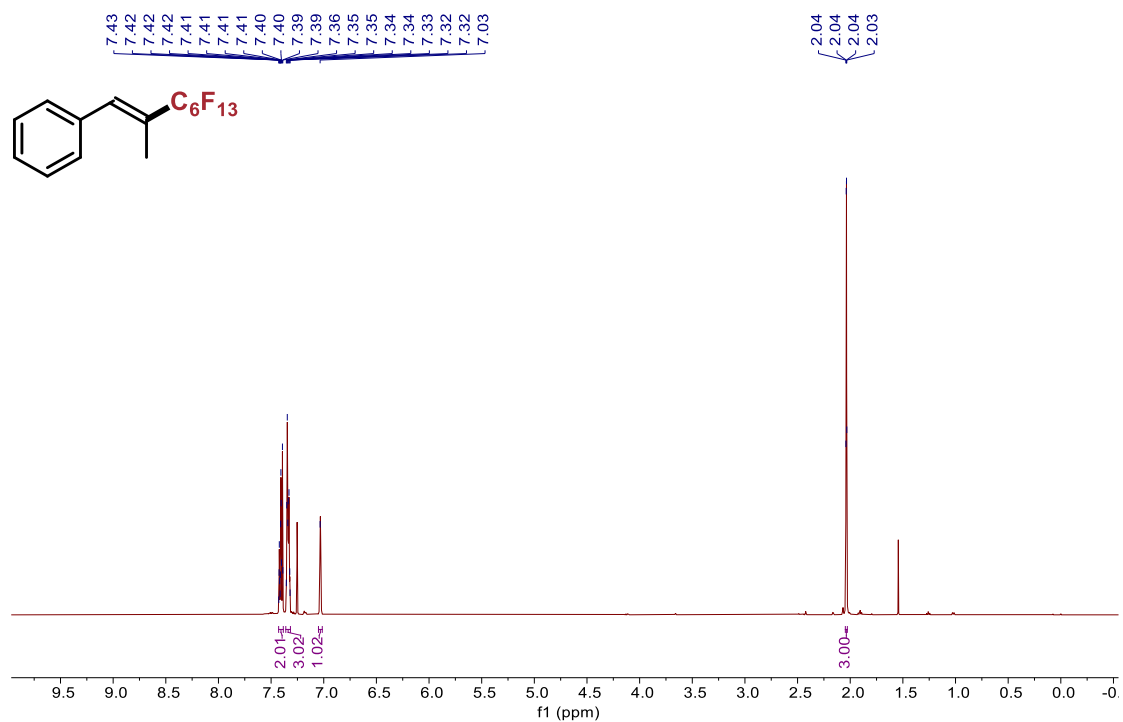

$^{13}\text{C}$  NMR of compound **5** (126 MHz in  $\text{CDCl}_3$ )

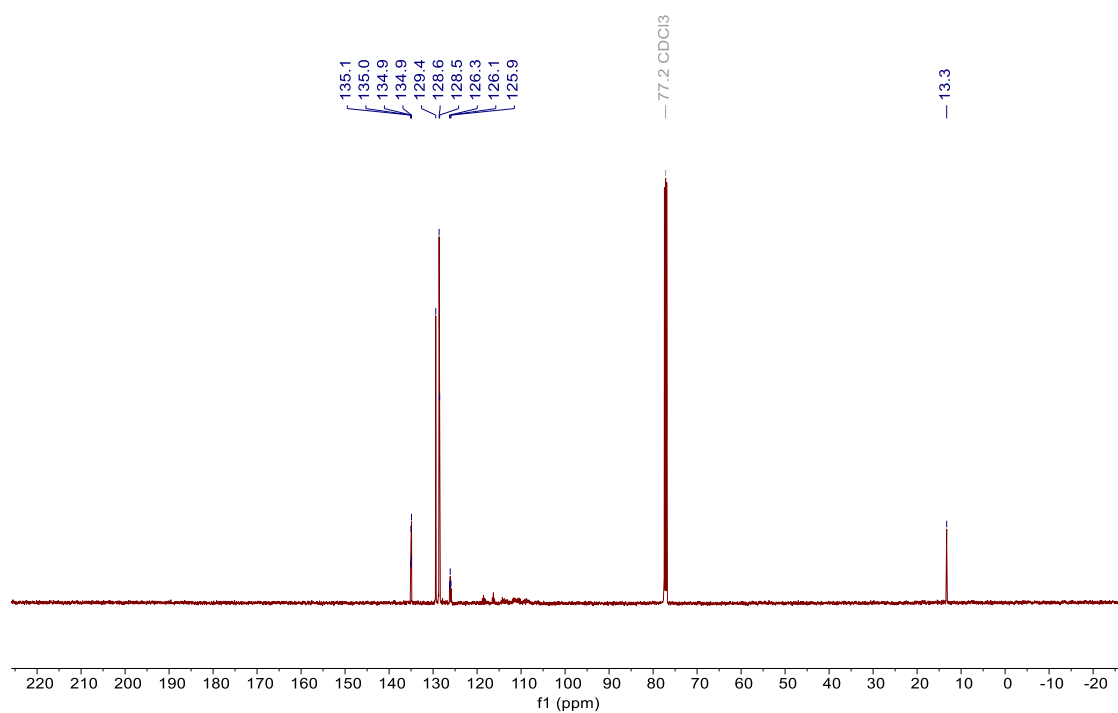

**$^{13}\text{F}$  NMR of compound 5 (376 MHz in  $\text{CDCl}_3$ )**

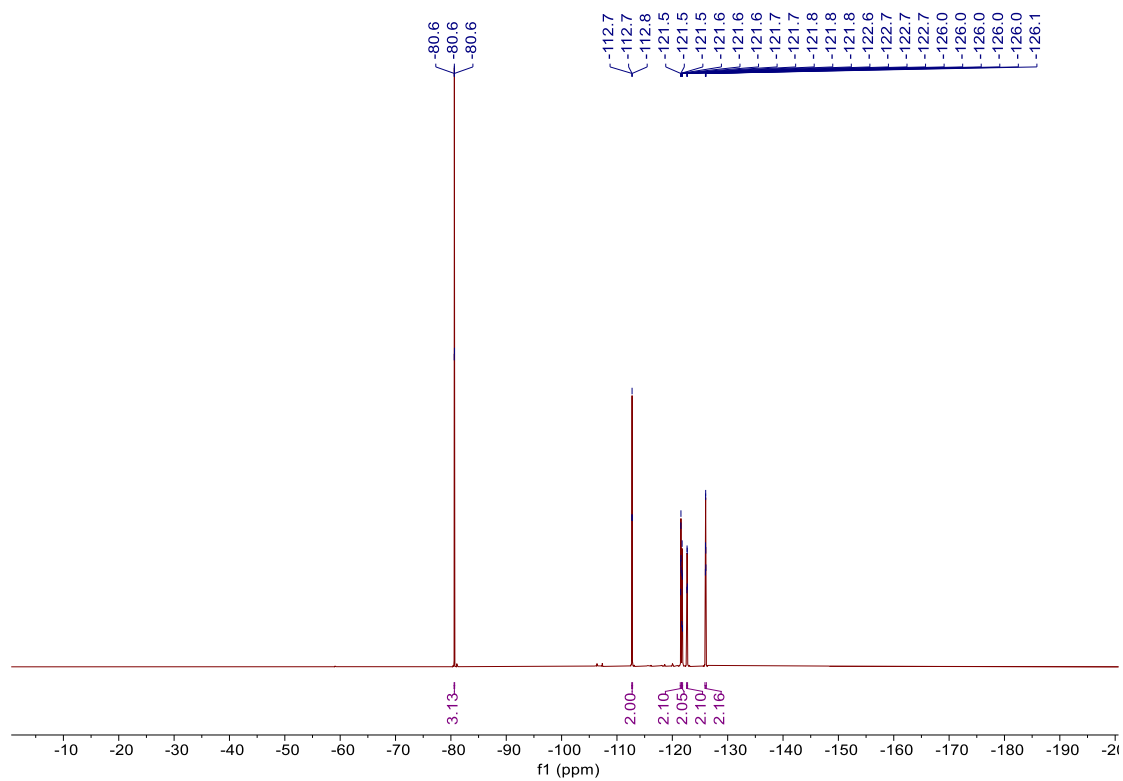

**NOESY of compound 5 (500 MHz in  $\text{CDCl}_3$ )**

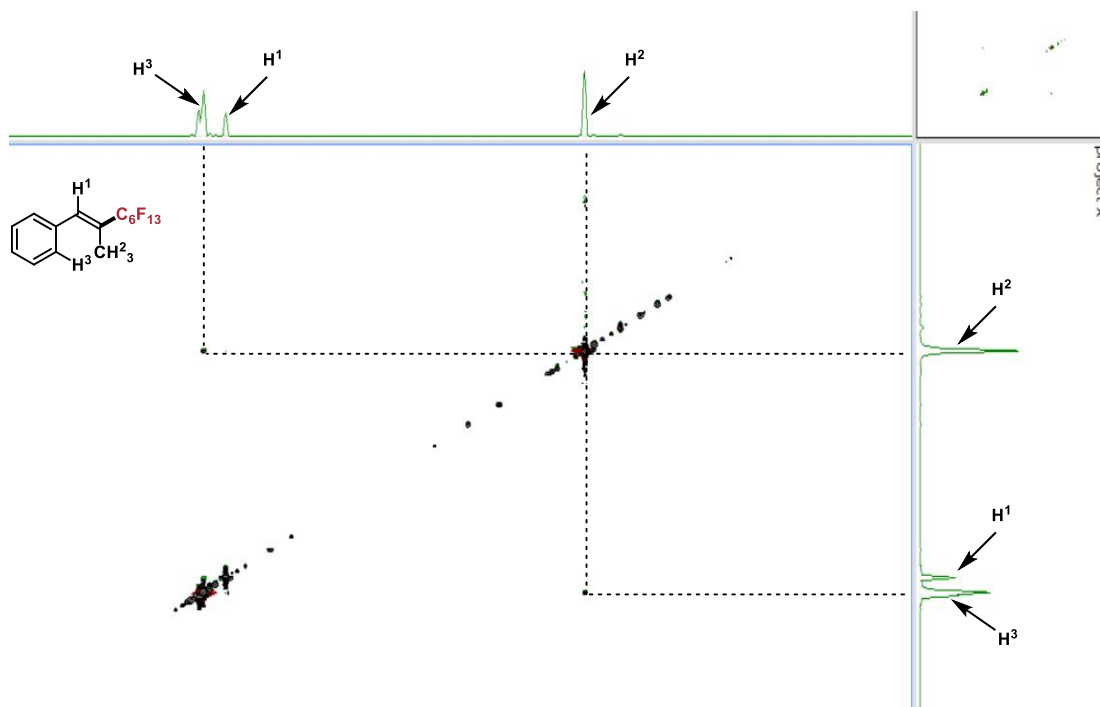

$^1\text{H}$  NMR of compound **6** (500 MHz in  $\text{CDCl}_3$ )

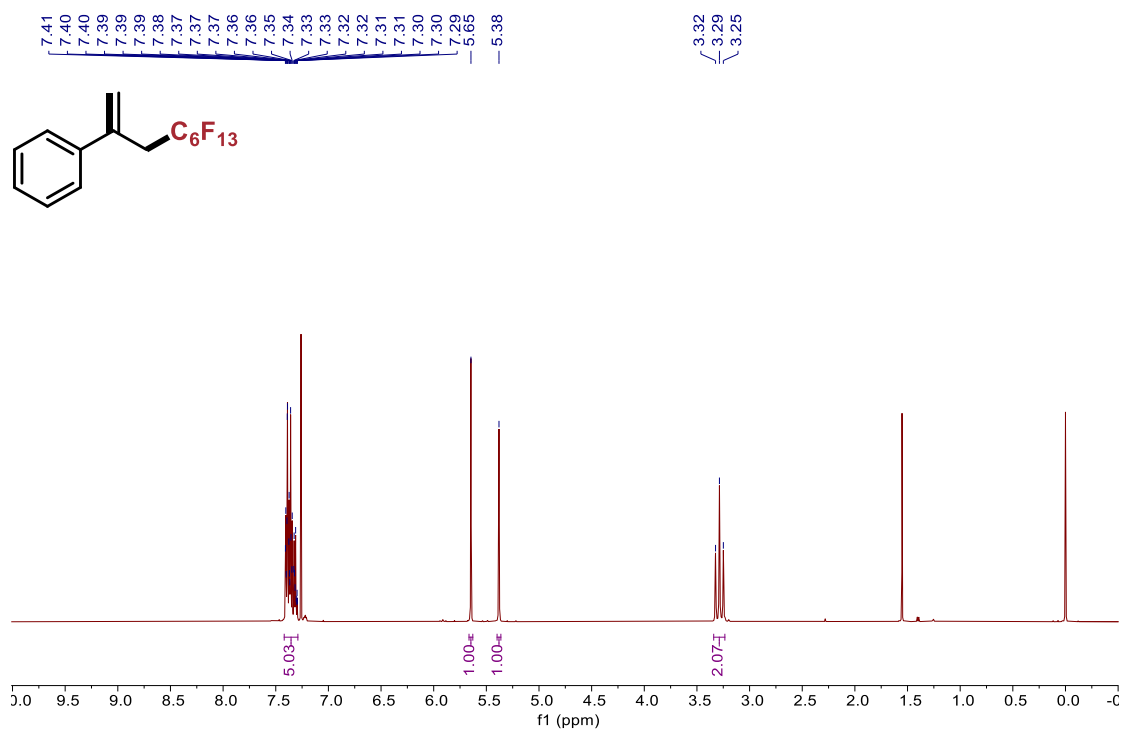

$^{13}\text{C}$  NMR of compound **6** (126 MHz in  $\text{CDCl}_3$ )

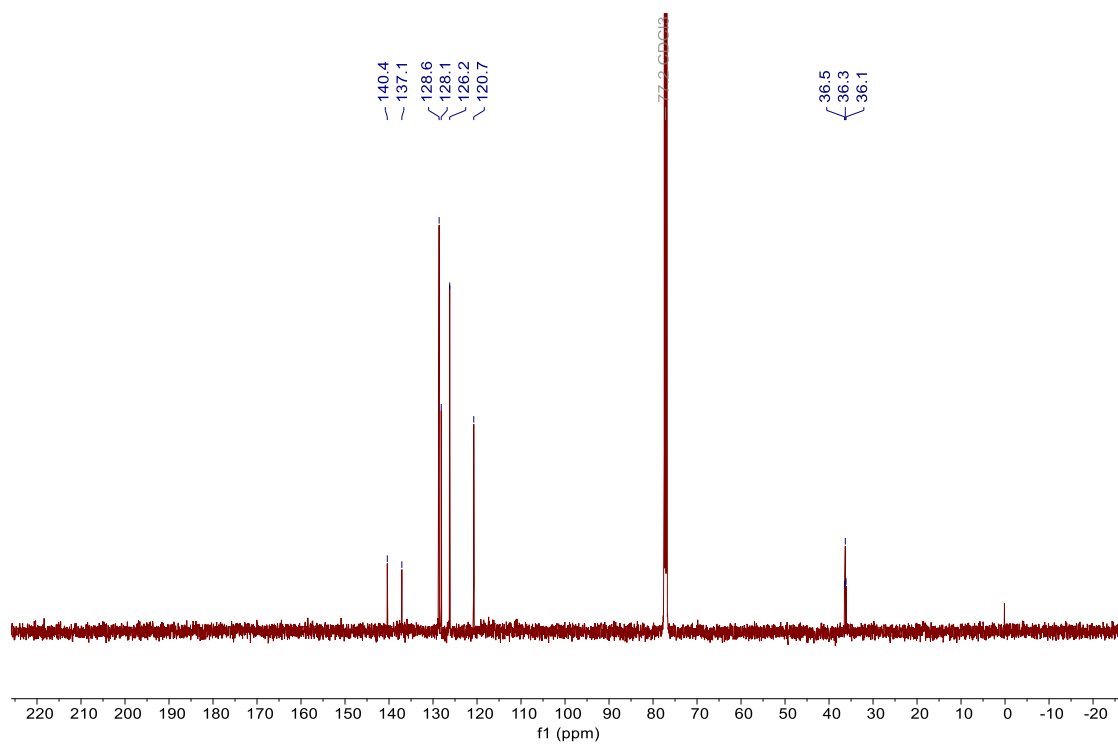

<sup>13</sup>F NMR of compound **6** (376 MHz in CDCl<sub>3</sub>)

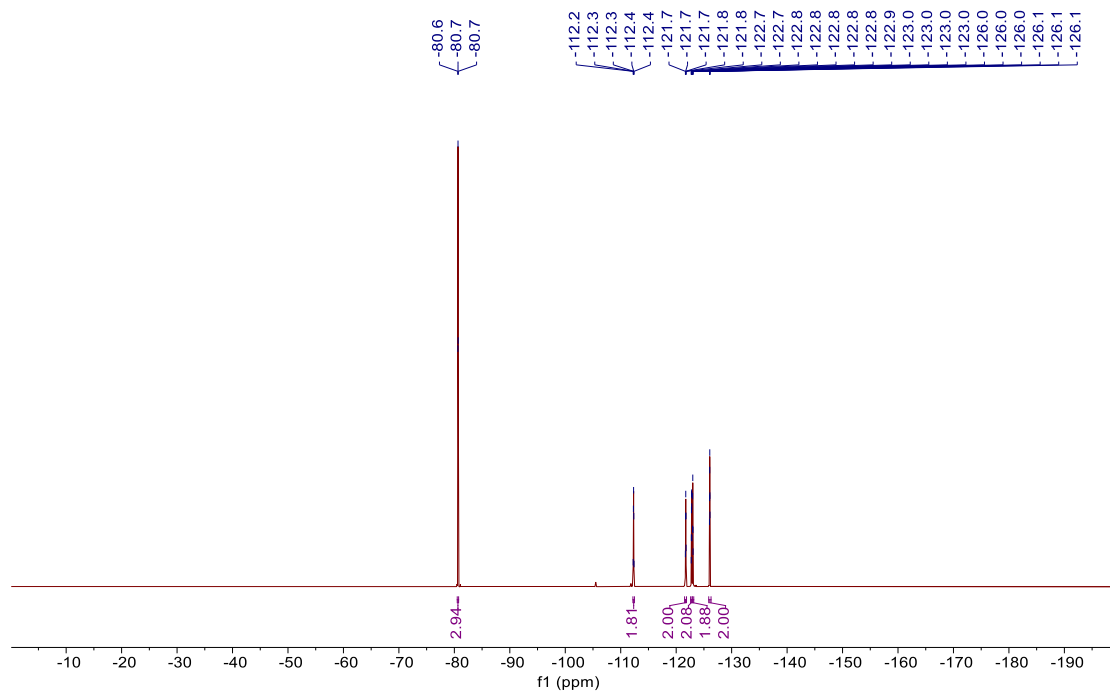



**<sup>19</sup>F NMR of compound 7 (376 MHz in CDCl<sub>3</sub>)**

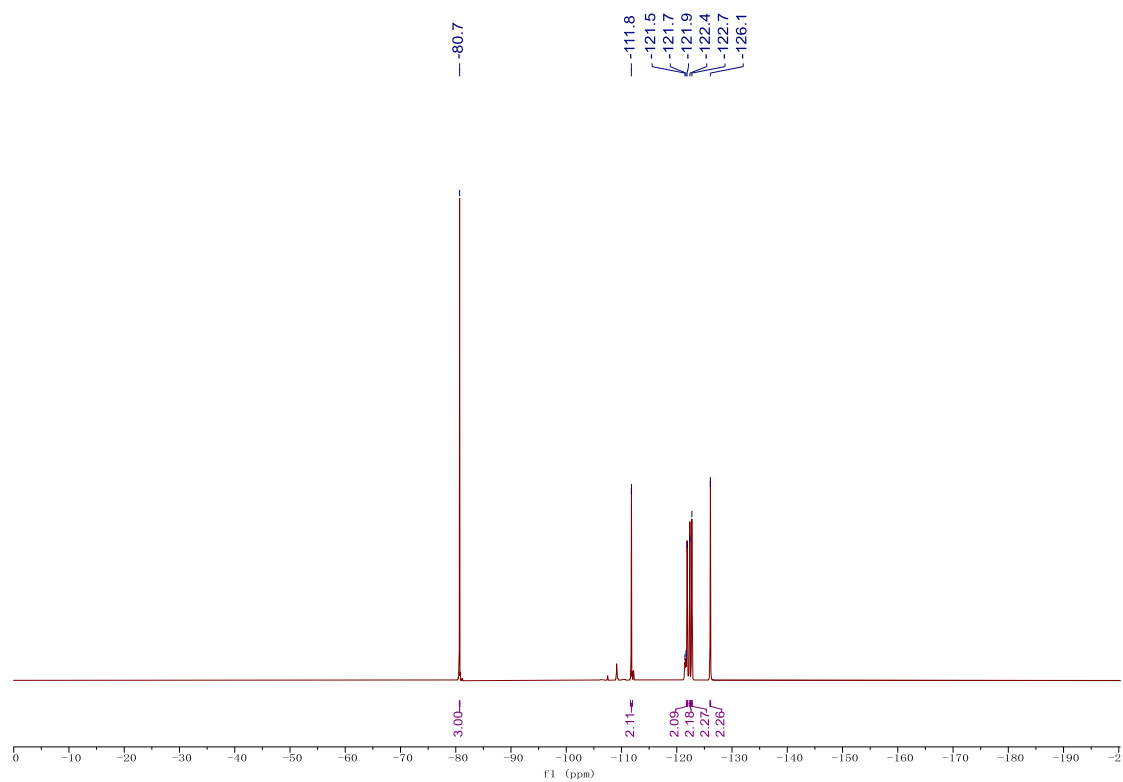



<sup>1</sup>H NMR of compound **8** (400 MHz in CDCl<sub>3</sub>)

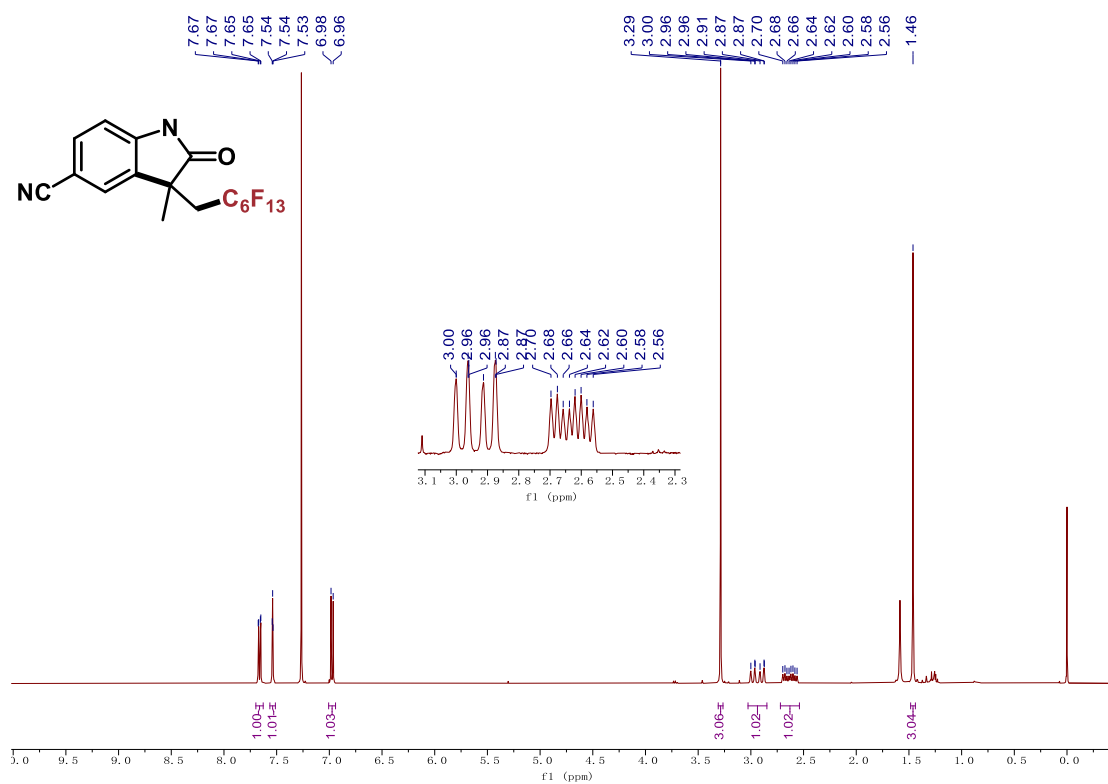

<sup>13</sup>C NMR of compound **8** (101 MHz in CDCl<sub>3</sub>)

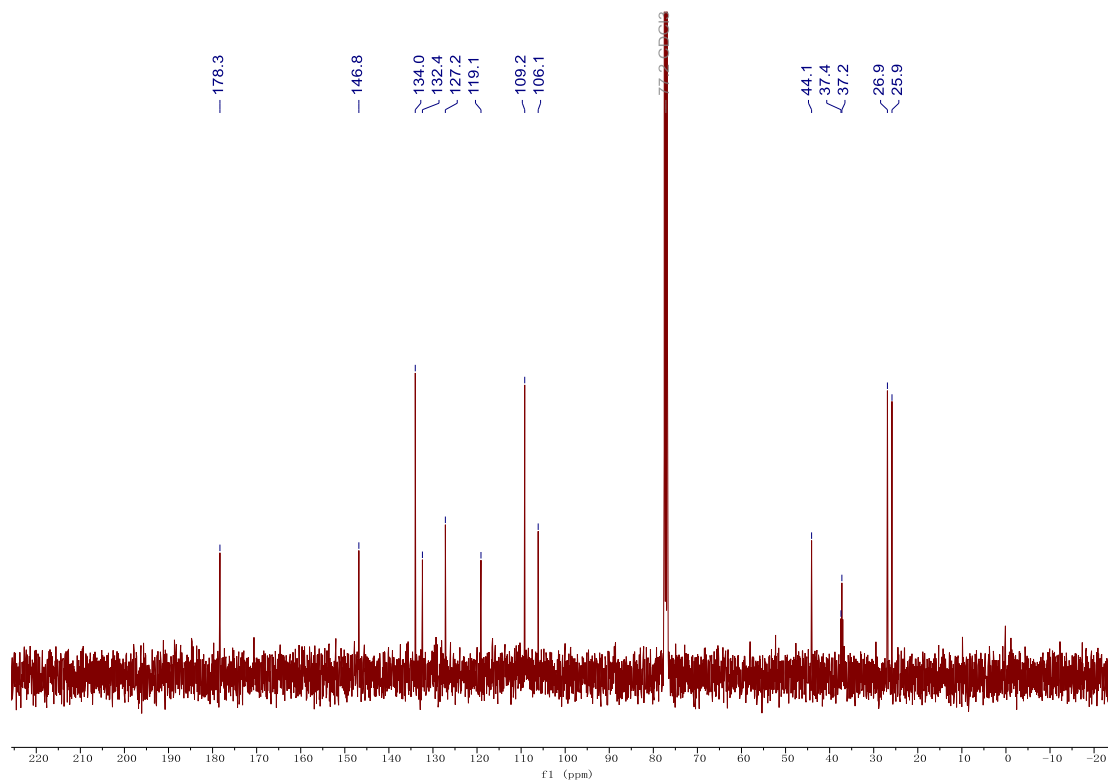

**<sup>19</sup>F NMR of compound 8 (376 MHz in CDCl<sub>3</sub>)**

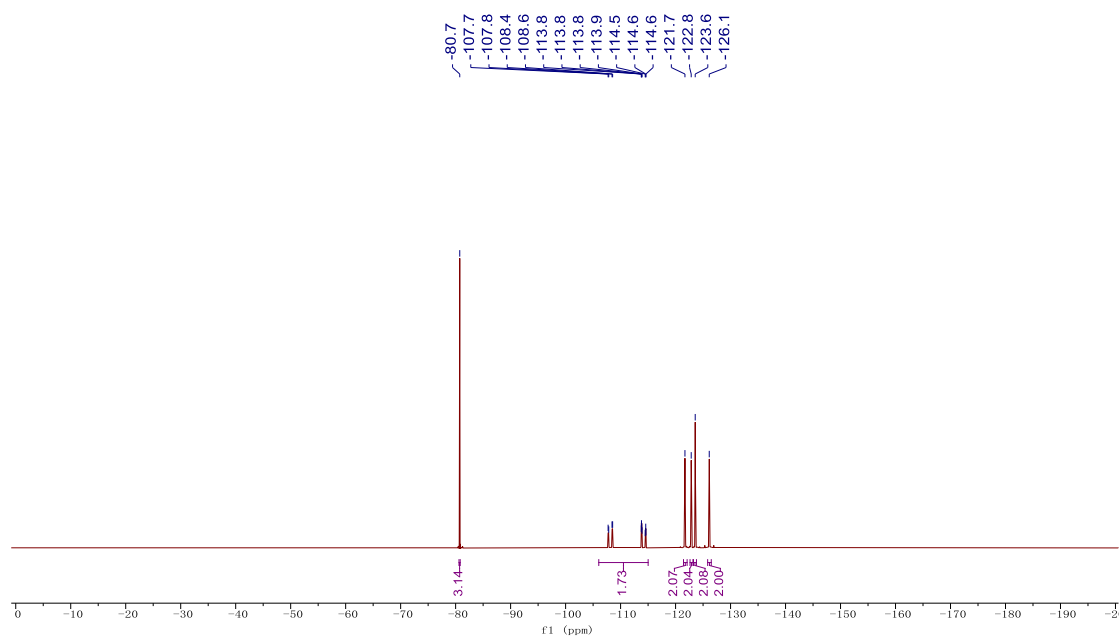

<sup>1</sup>H NMR of compound **9** (400 MHz in CDCl<sub>3</sub>)

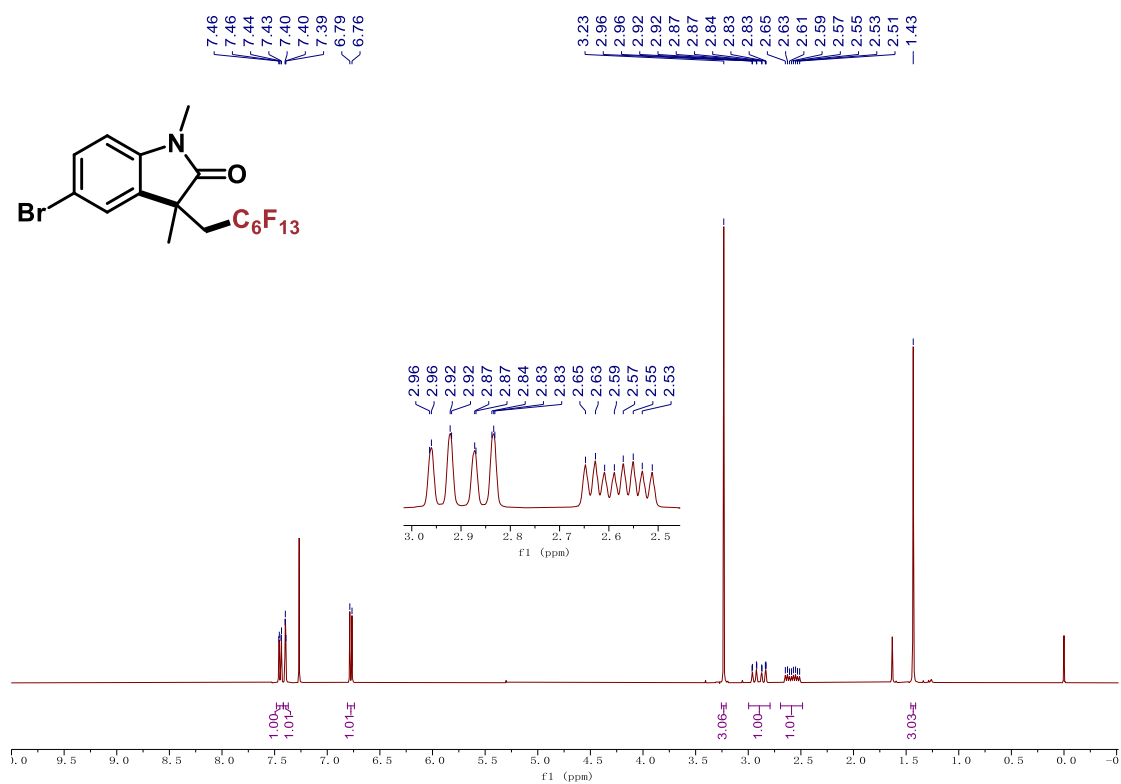

<sup>13</sup>C NMR of compound **9** (101 MHz in CDCl<sub>3</sub>)

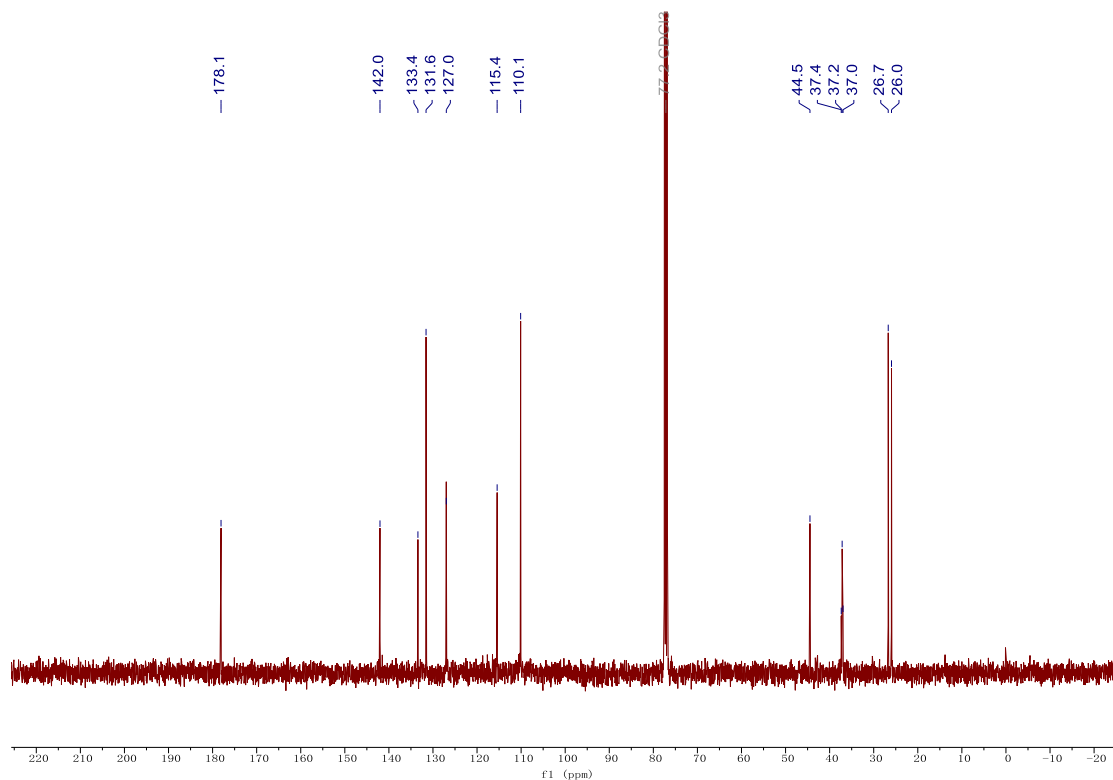

**<sup>19</sup>F NMR of compound 9 (376 MHz in CDCl<sub>3</sub>)**

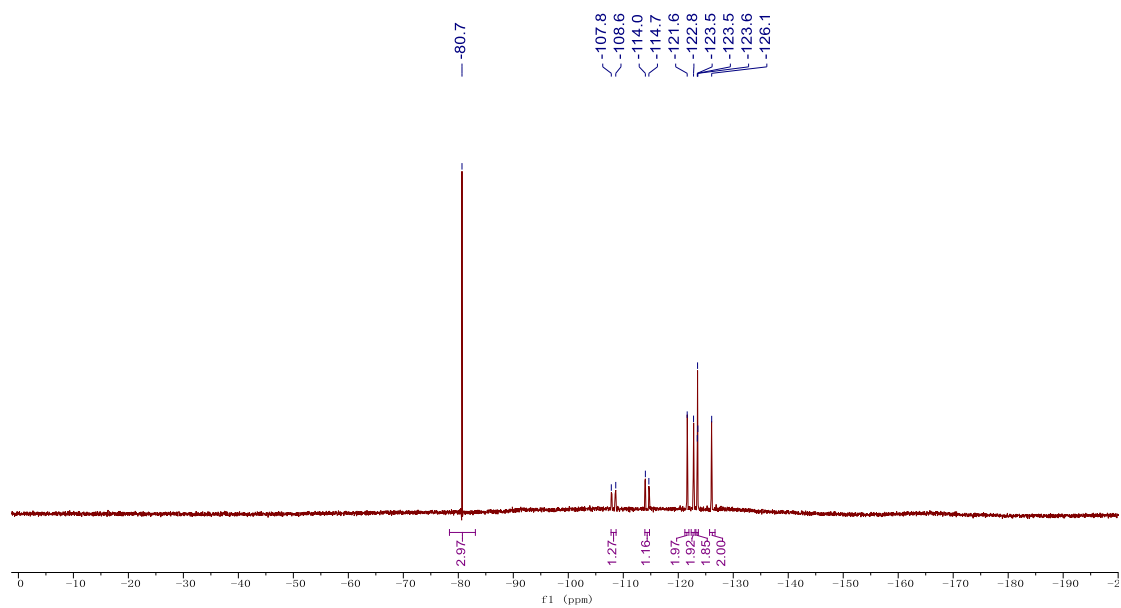

<sup>1</sup>H NMR of compound **10** (400 MHz in CDCl<sub>3</sub>)

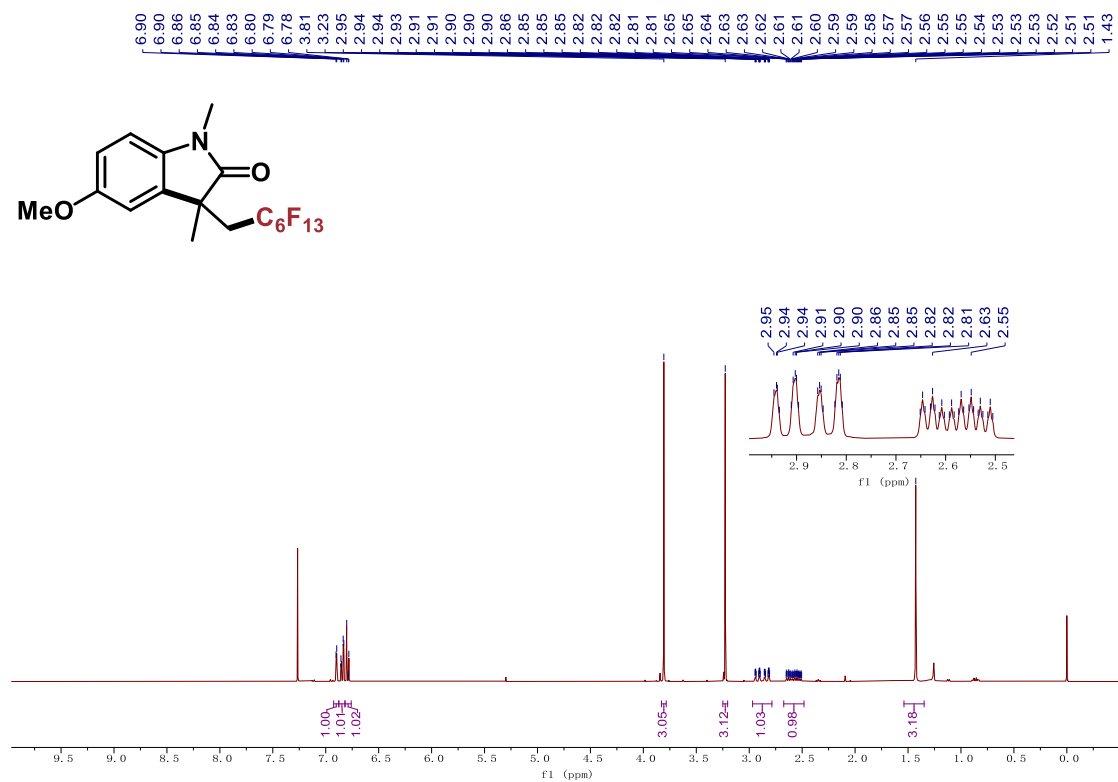

<sup>13</sup>C NMR of compound **10** (101 MHz in CDCl<sub>3</sub>)

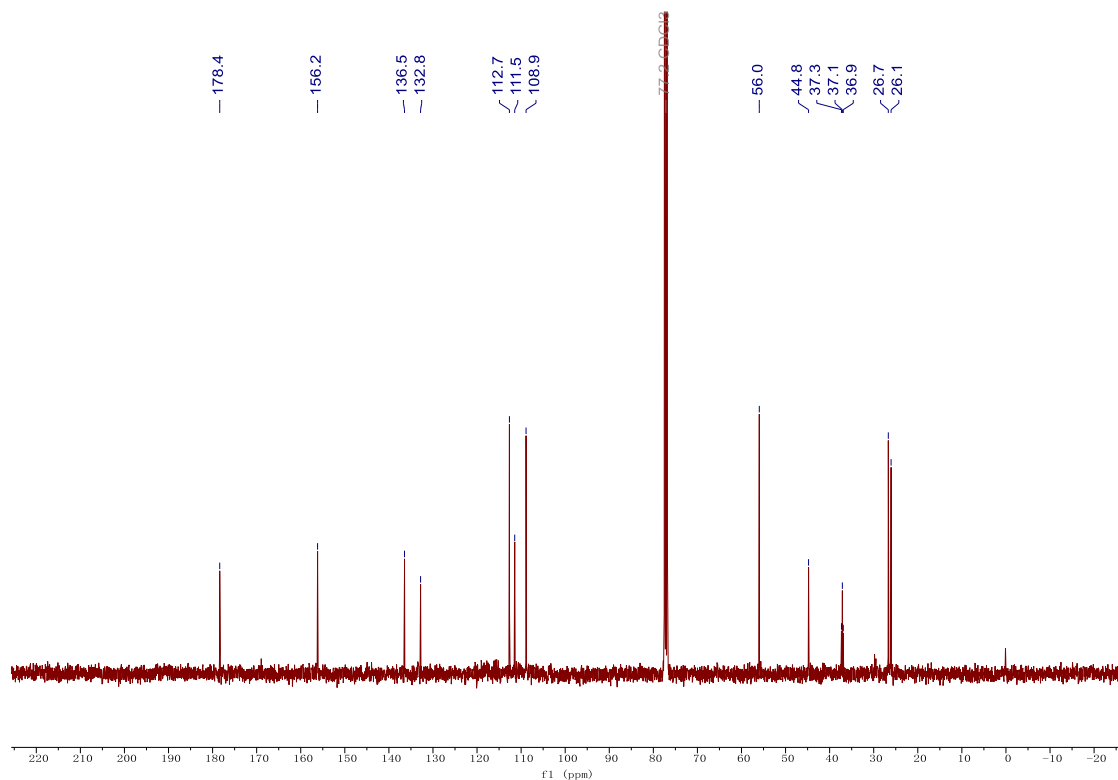

**<sup>19</sup>F NMR of compound 10 (376 MHz in CDCl<sub>3</sub>)**

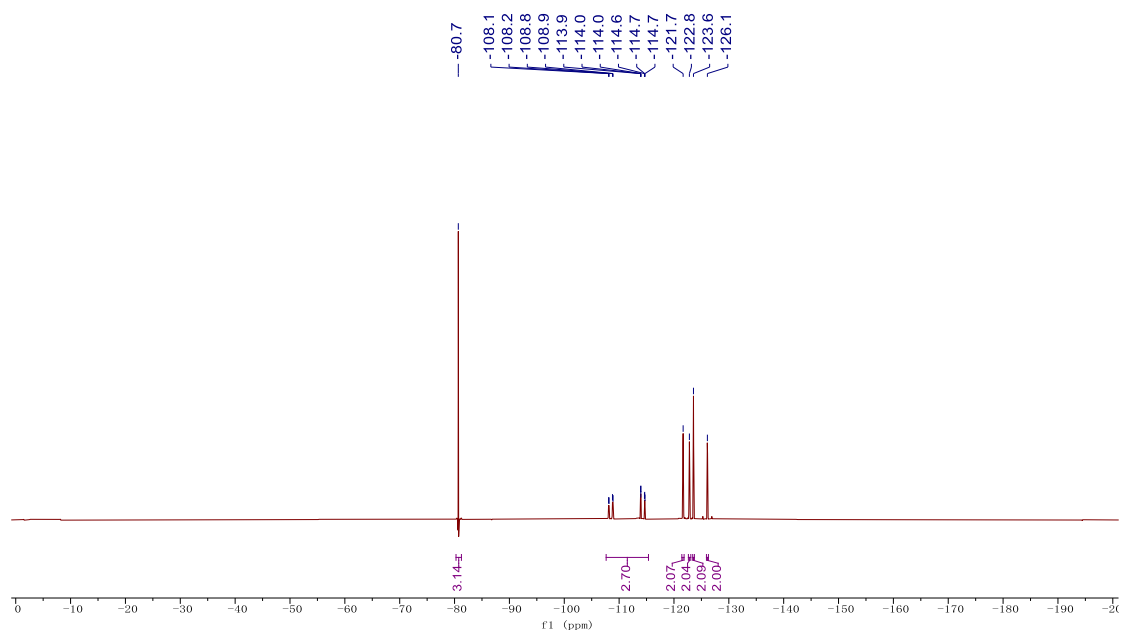



**<sup>19</sup>F NMR of compound 11 (376 MHz in CDCl<sub>3</sub>)**

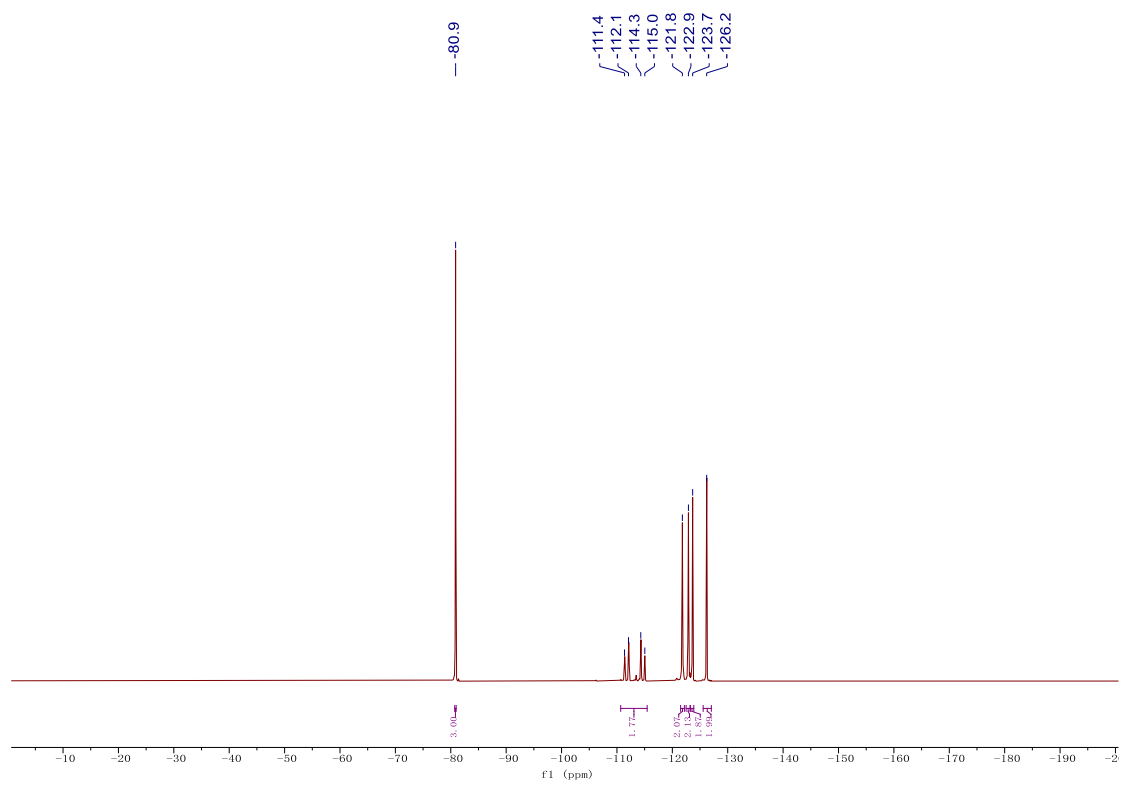



**<sup>1</sup>H NMR of compound 12 (400 MHz in CDCl<sub>3</sub>)**

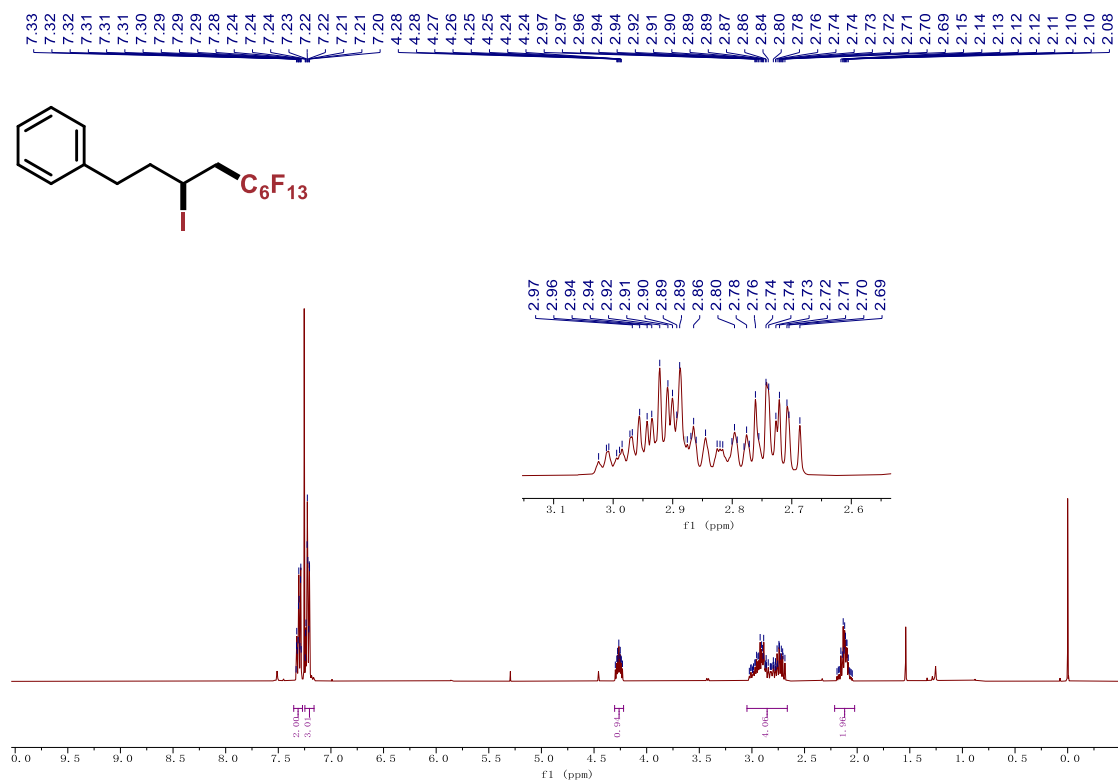

**<sup>13</sup>C NMR of compound 12 (101 MHz in CDCl<sub>3</sub>)**

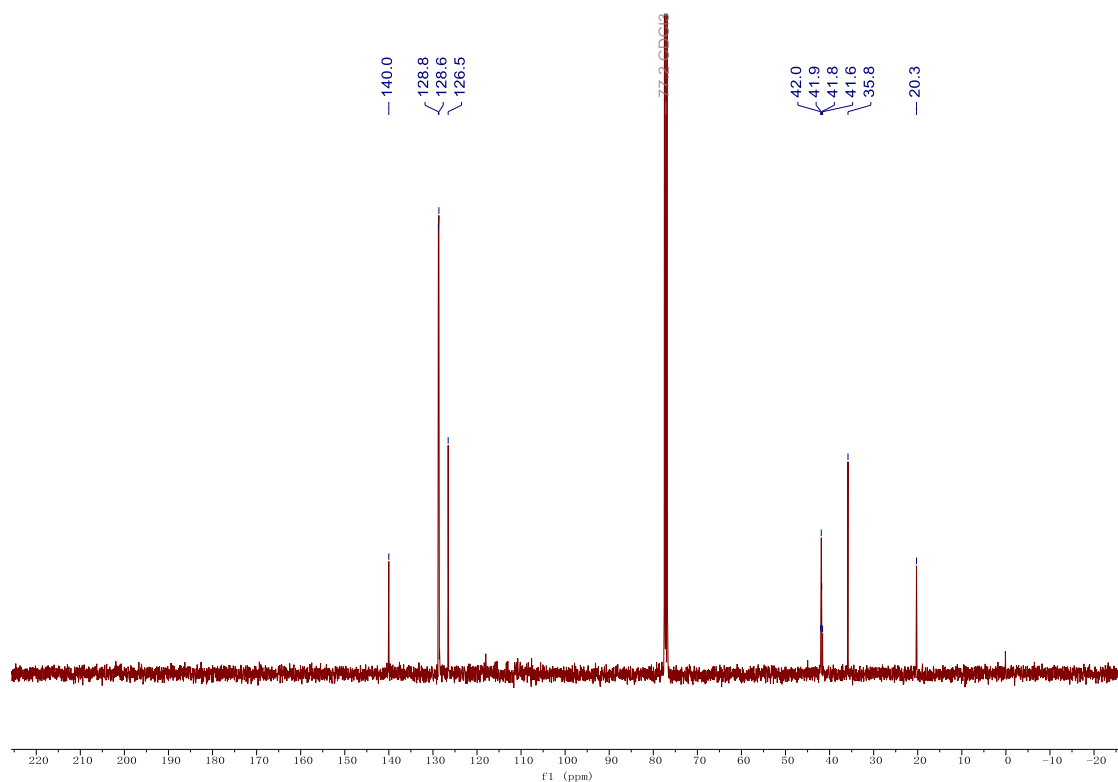

**<sup>19</sup>F NMR of compound 12 (376 MHz in CDCl<sub>3</sub>)**

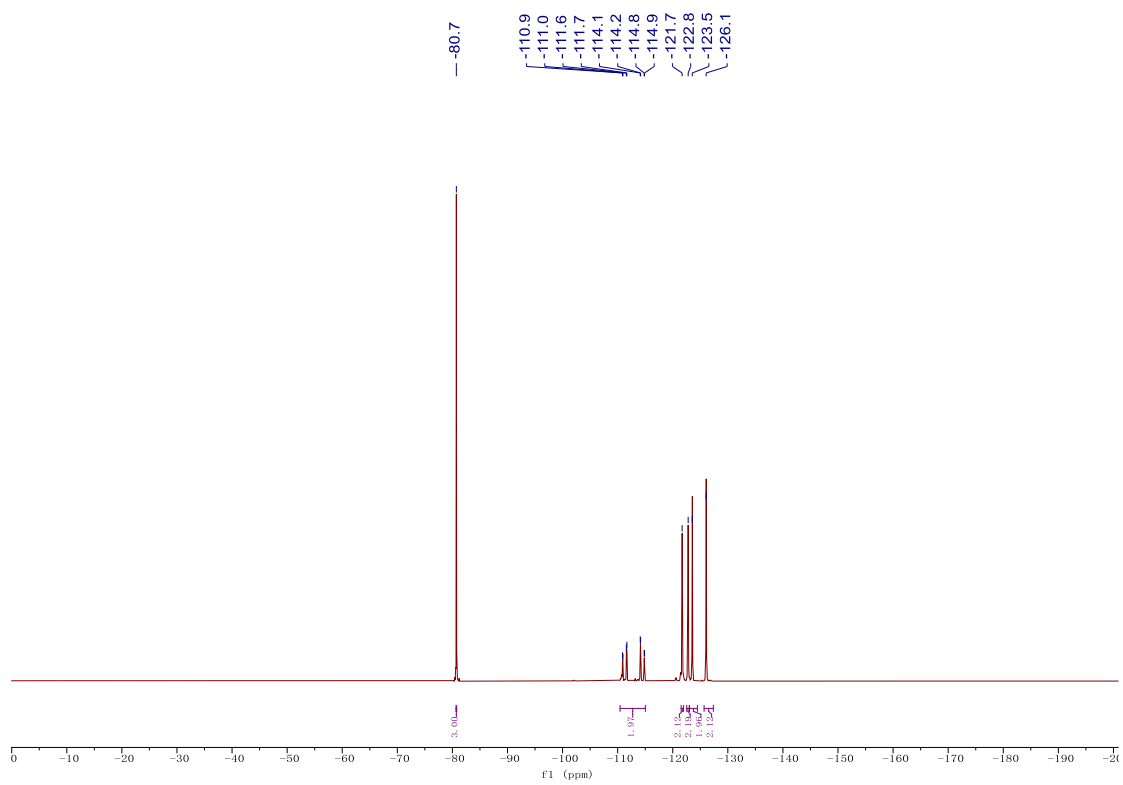

<sup>1</sup>H NMR of compound **13** (500 MHz in CDCl<sub>3</sub>)

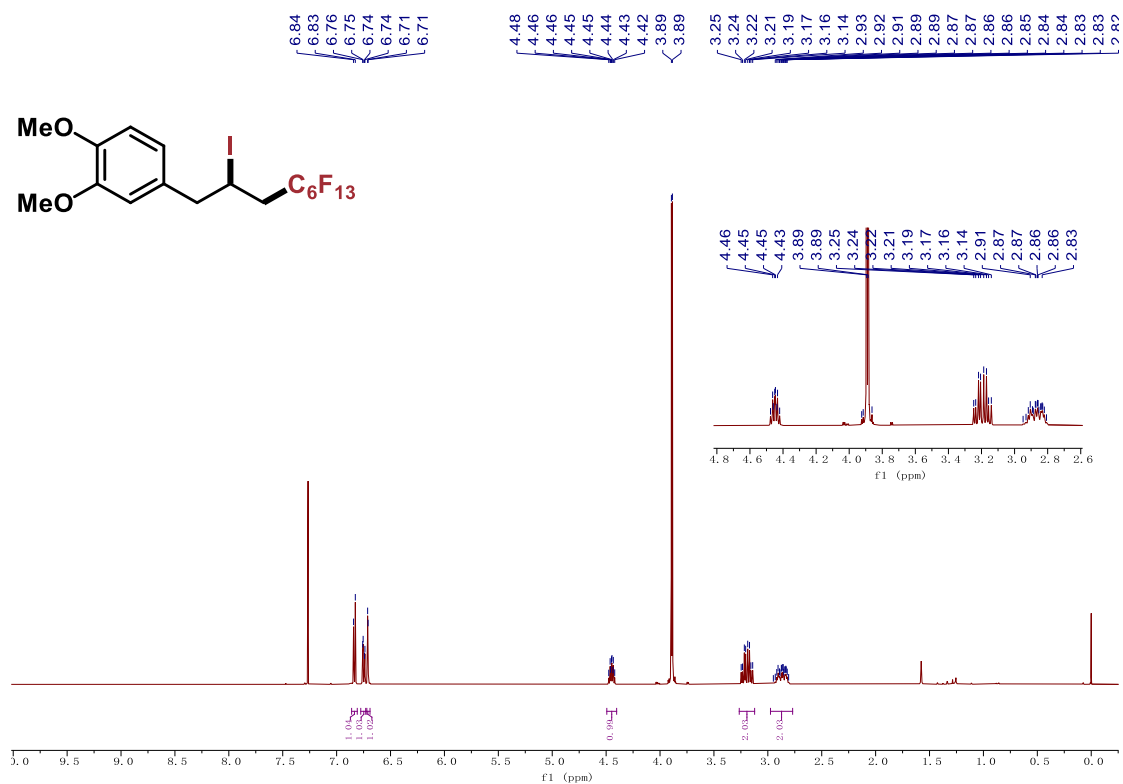

<sup>13</sup>C NMR of compound **13** (126 MHz in CDCl<sub>3</sub>)

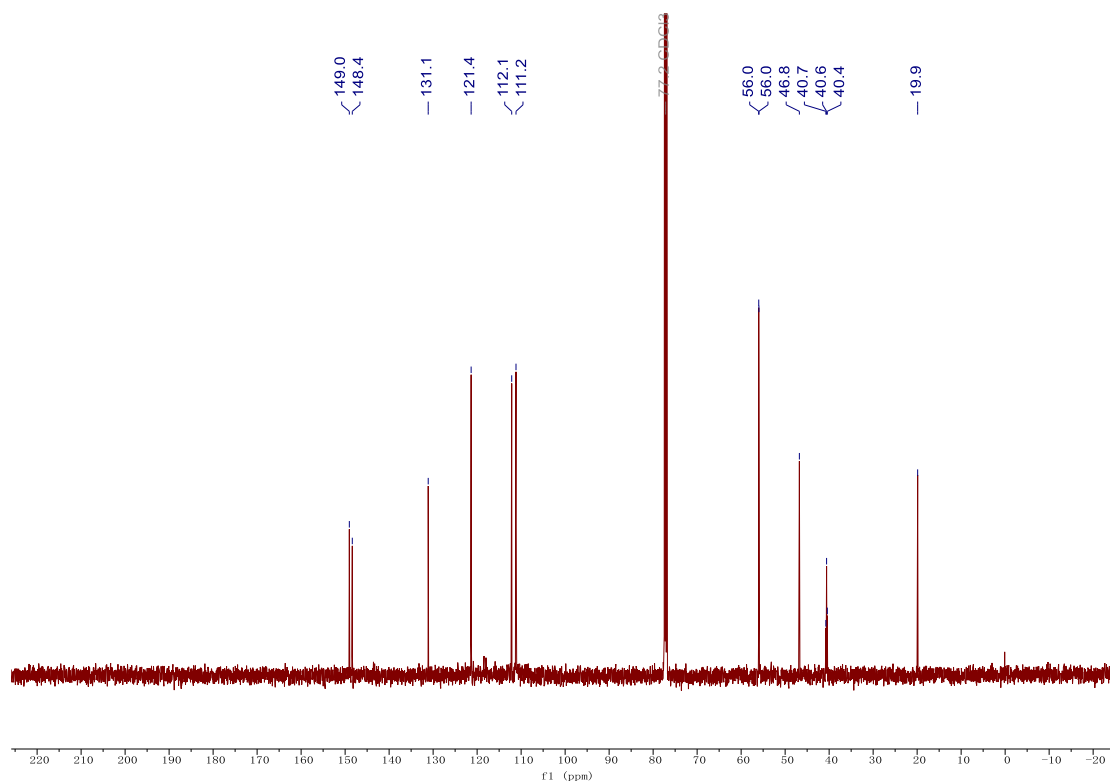

**<sup>19</sup>F NMR of compound 13 (376 MHz in CDCl<sub>3</sub>)**

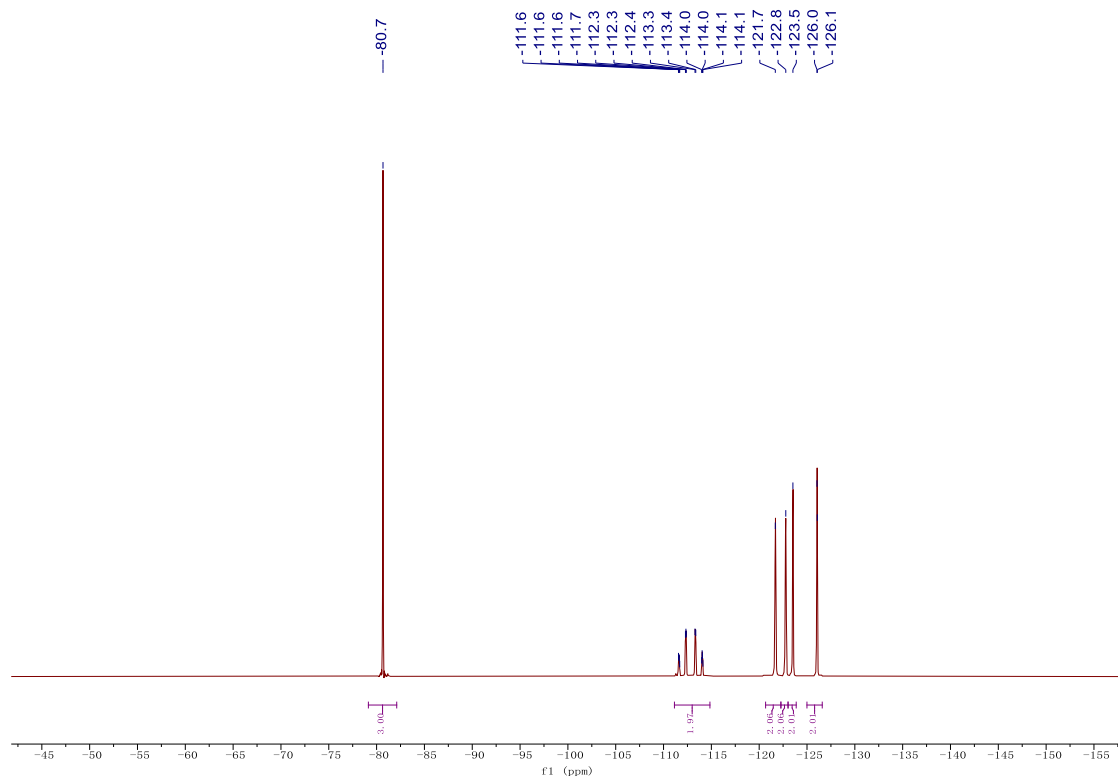

<sup>1</sup>H NMR of compound **14** (500 MHz in CDCl<sub>3</sub>)

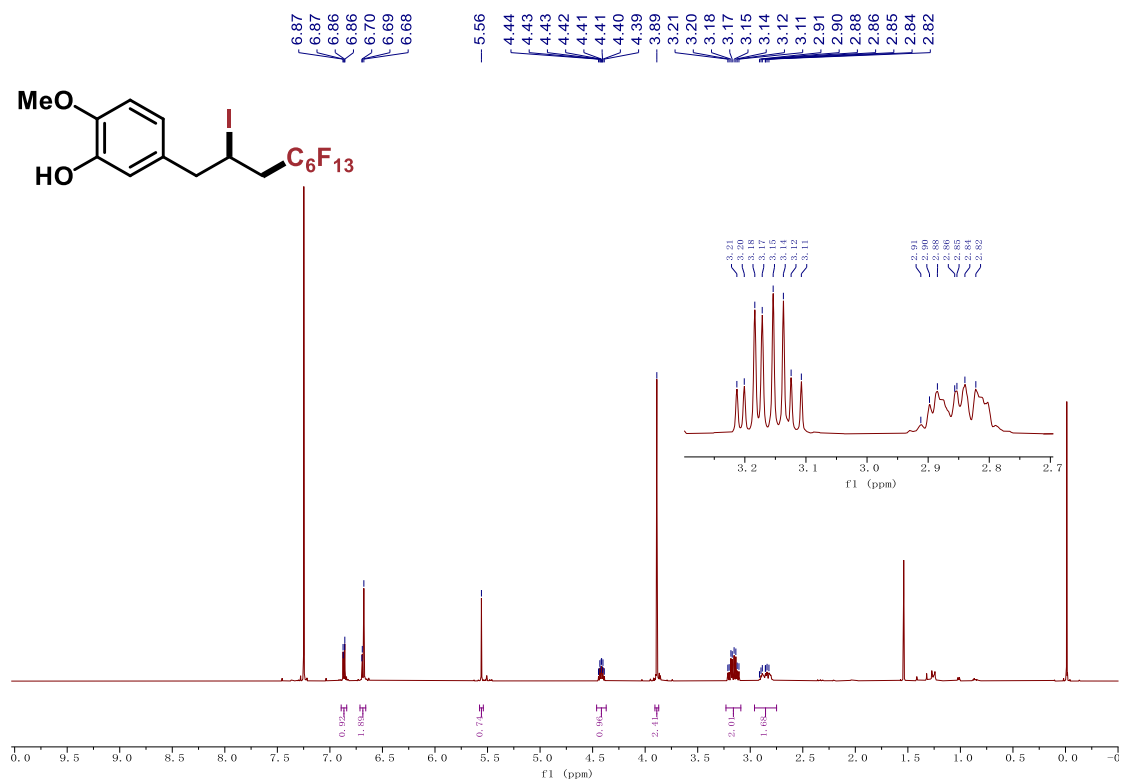

<sup>13</sup>C NMR of compound **14** (101 MHz in CDCl<sub>3</sub>)

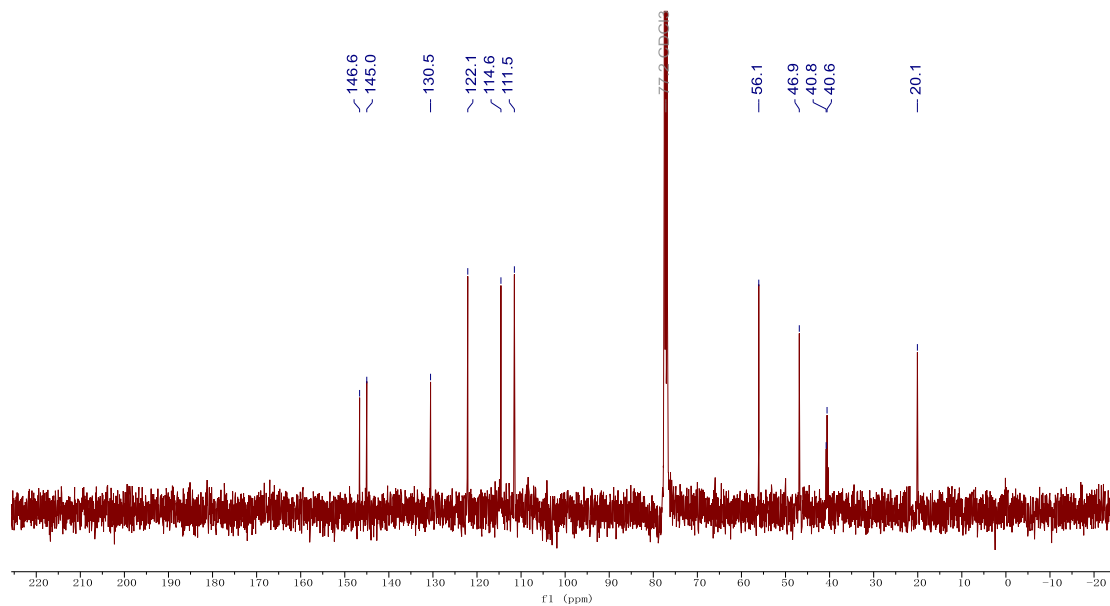

**<sup>19</sup>F NMR of compound 14 (376 MHz in CDCl<sub>3</sub>)**

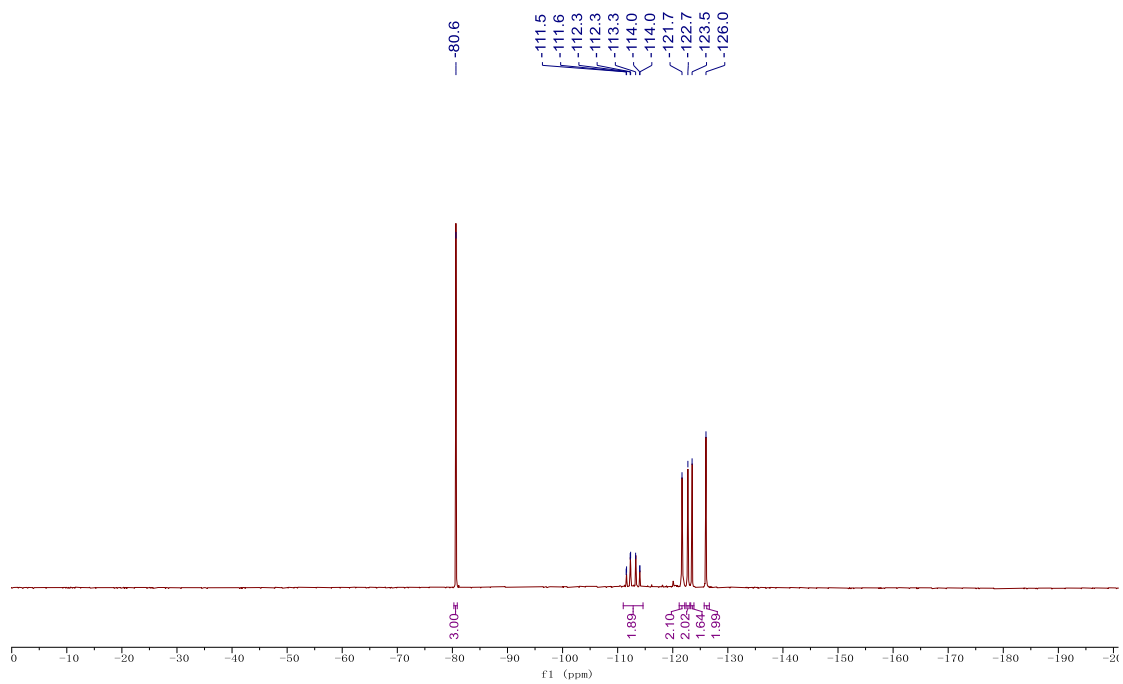



**<sup>19</sup>F NMR of compound 15 (471 MHz in CDCl<sub>3</sub>)**

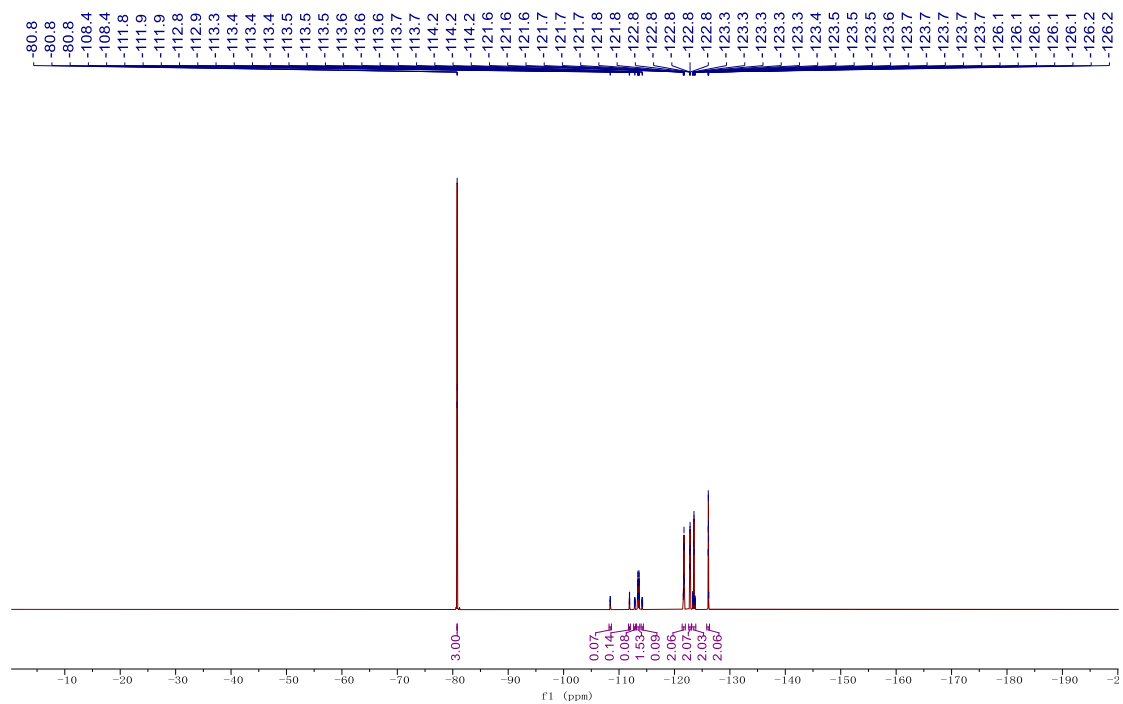





**<sup>19</sup>F NMR of compound 16 (376 MHz in CDCl<sub>3</sub>)**

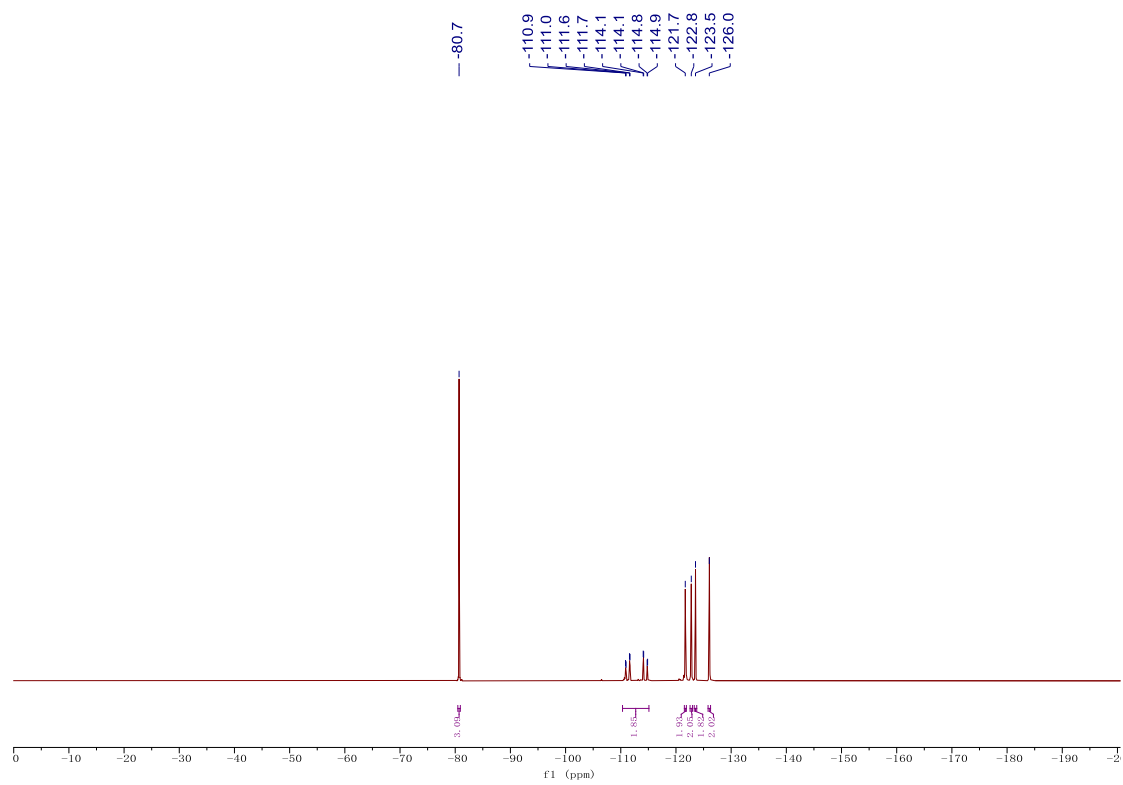

**<sup>1</sup>H NMR of compound 17 (400 MHz in CDCl<sub>3</sub>)**

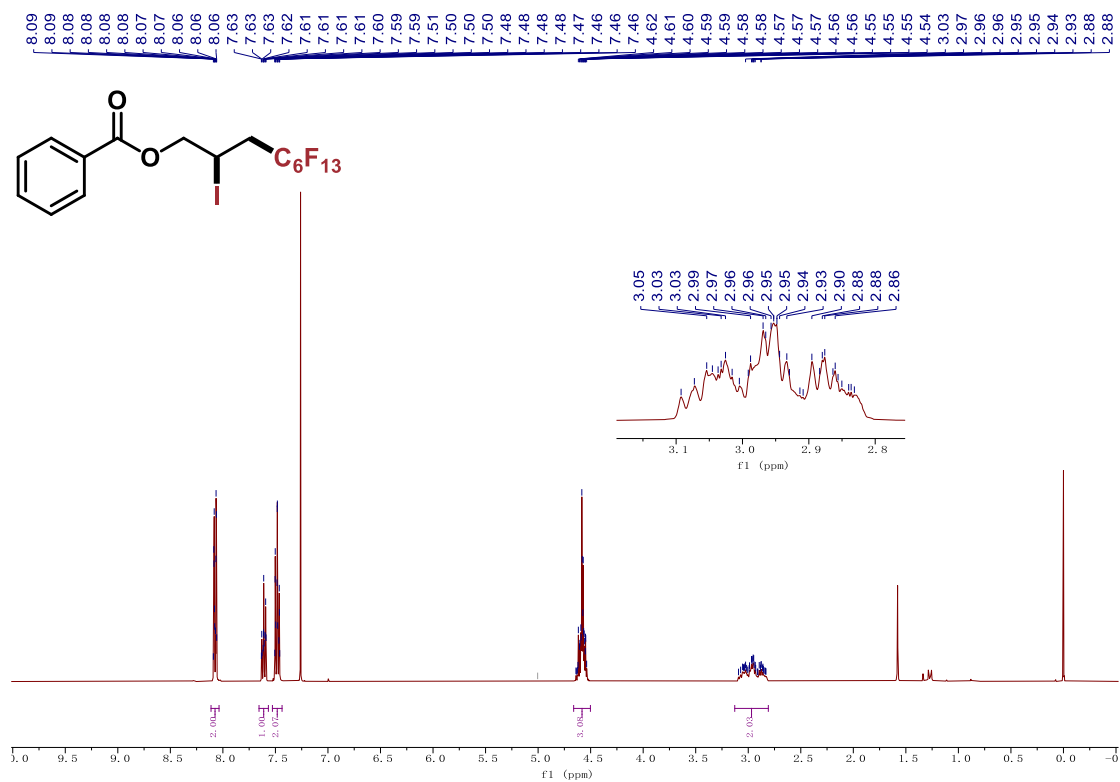

**<sup>13</sup>C NMR of compound 17 (126 MHz in CDCl<sub>3</sub>)**

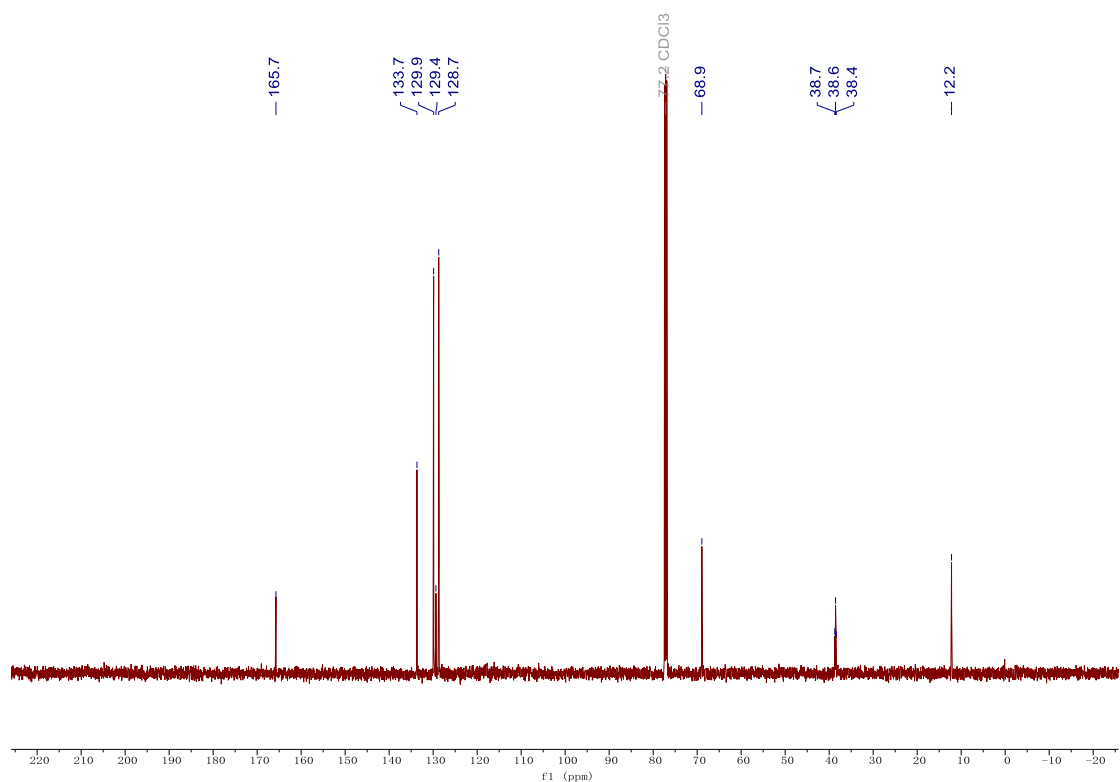

**<sup>19</sup>F NMR of compound 17 (376 MHz in CDCl<sub>3</sub>)**

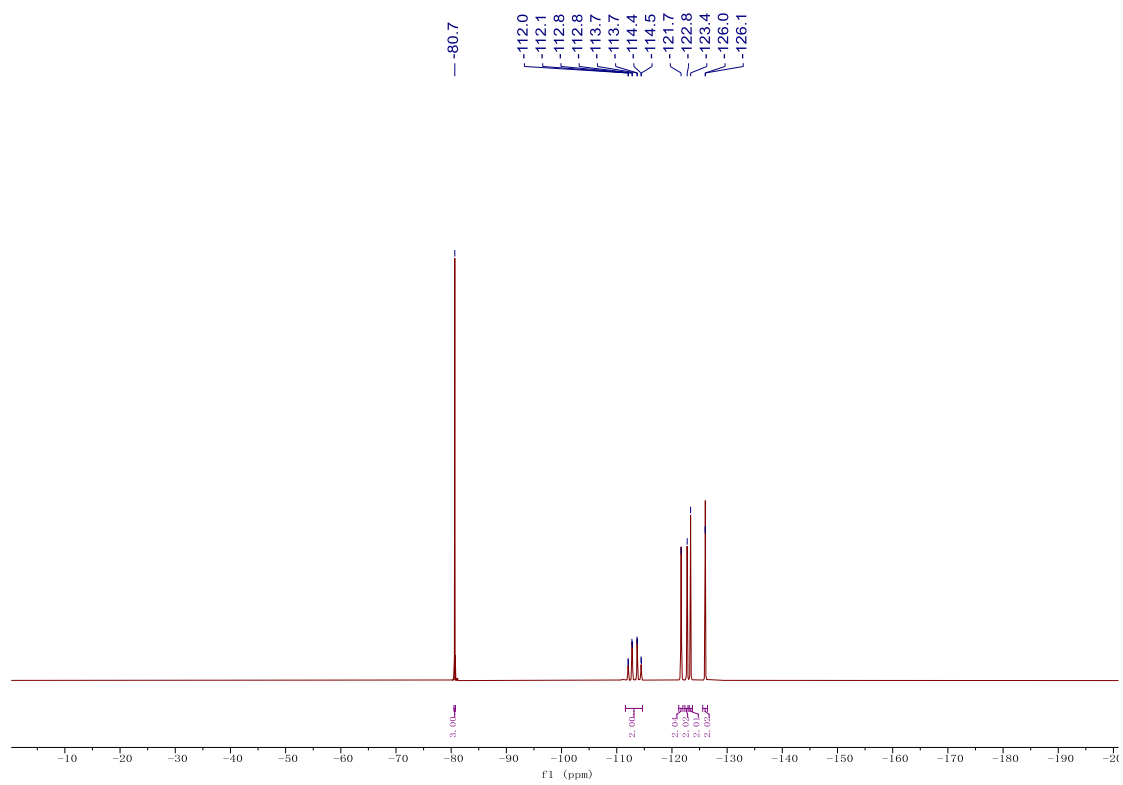

**<sup>1</sup>H NMR of compound 18 (400 MHz in CDCl<sub>3</sub>)**

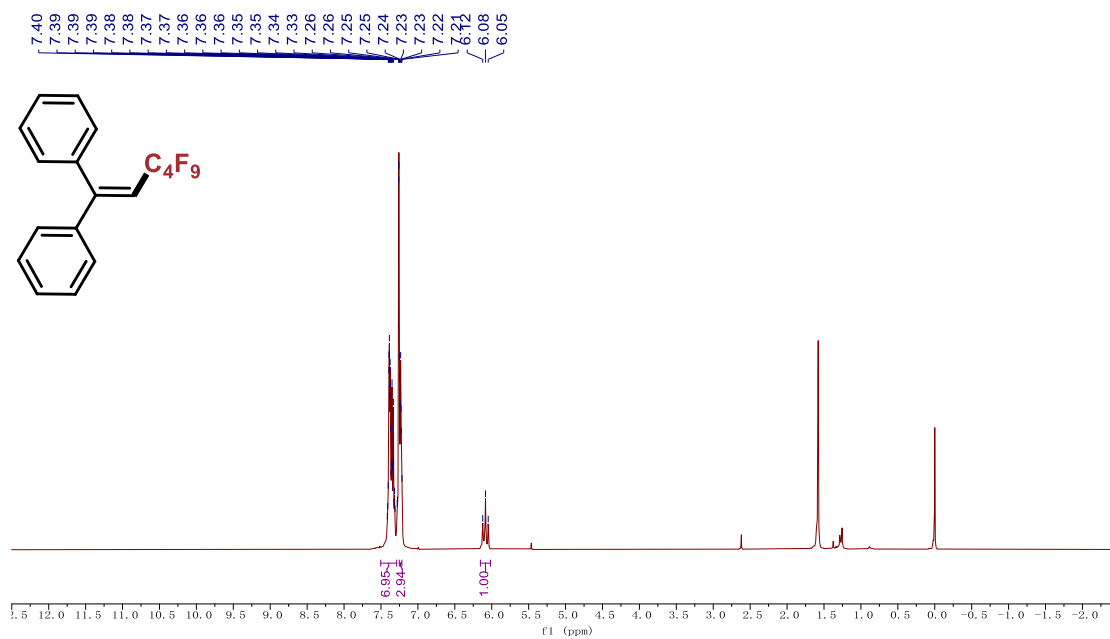

**<sup>13</sup>C NMR of compound 18 (101 MHz in CDCl<sub>3</sub>)**

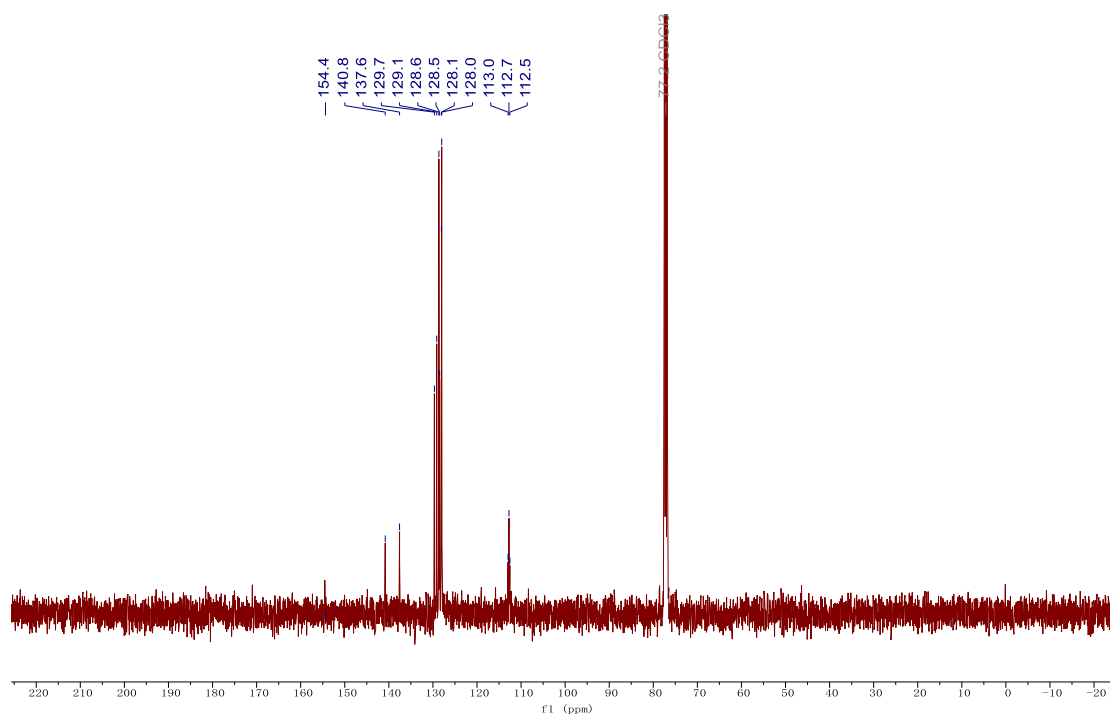

**<sup>19</sup>F NMR of compound 18 (376 MHz in CDCl<sub>3</sub>)**

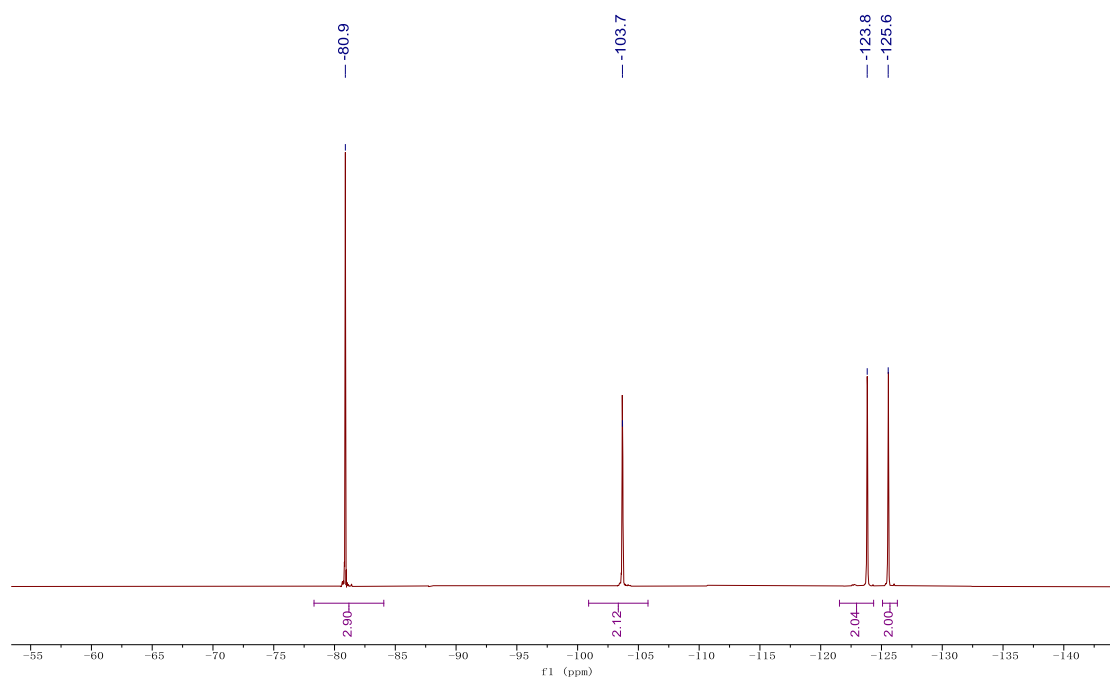



**<sup>19</sup>F NMR of compound **19** (376 MHz in CDCl<sub>3</sub>)**

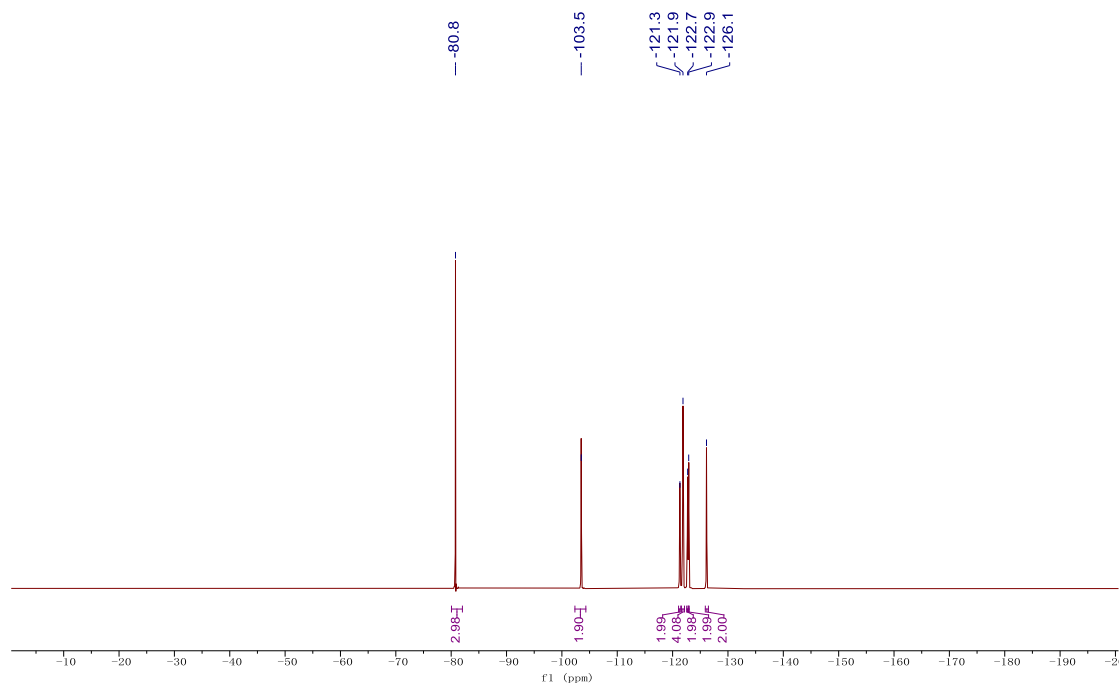



**<sup>1</sup>H NMR of compound 20 (400 MHz in CDCl<sub>3</sub>)**

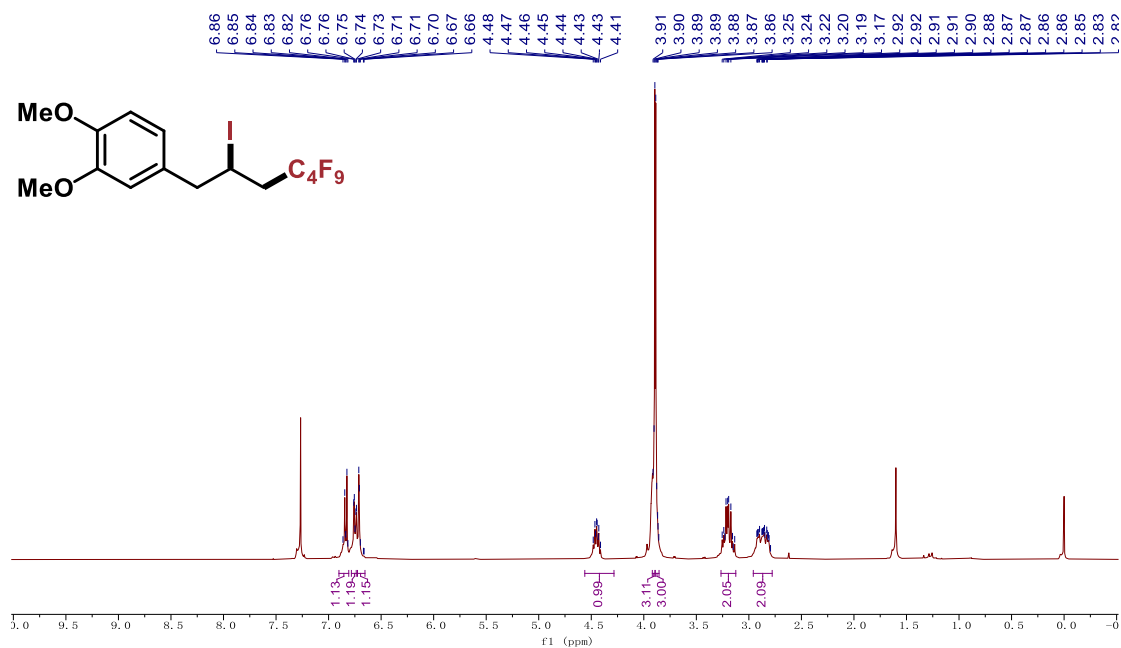

**<sup>13</sup>C NMR of compound 20 (101 MHz in CDCl<sub>3</sub>)**

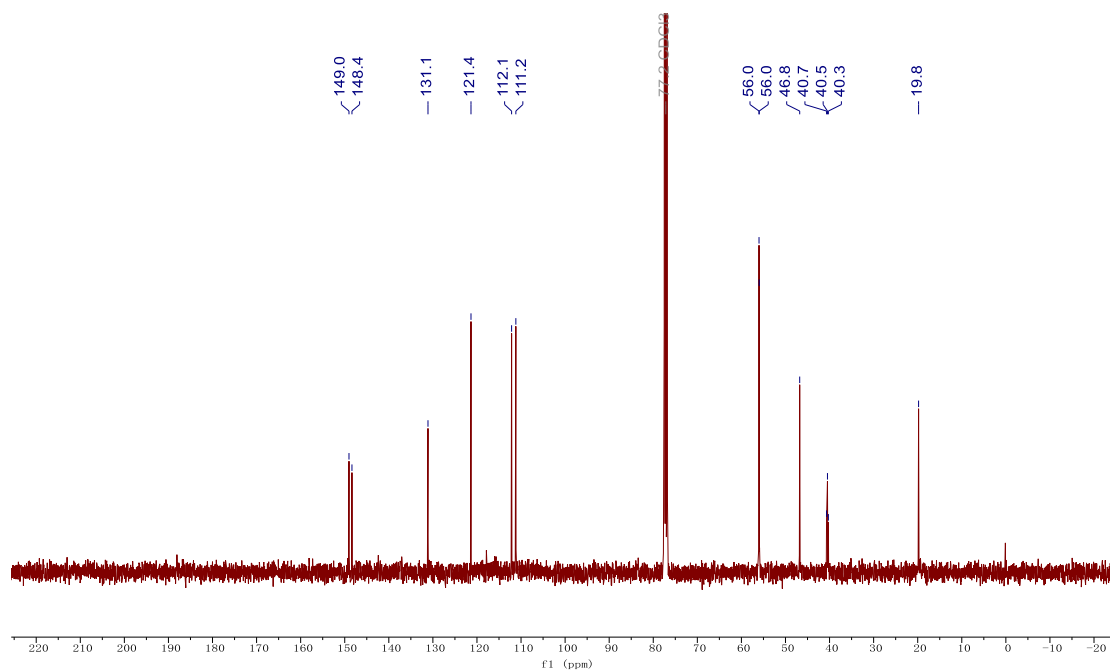

**<sup>19</sup>F NMR of compound 20 (376 MHz in CDCl<sub>3</sub>)**

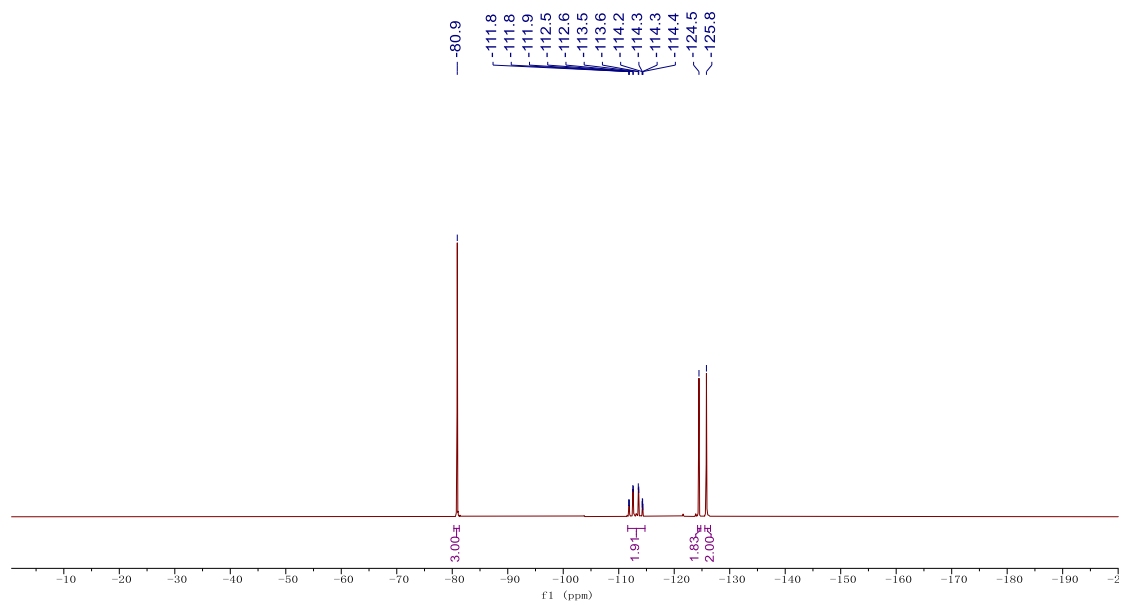

<sup>1</sup>H NMR of compound **21** (400 MHz in CDCl<sub>3</sub>)

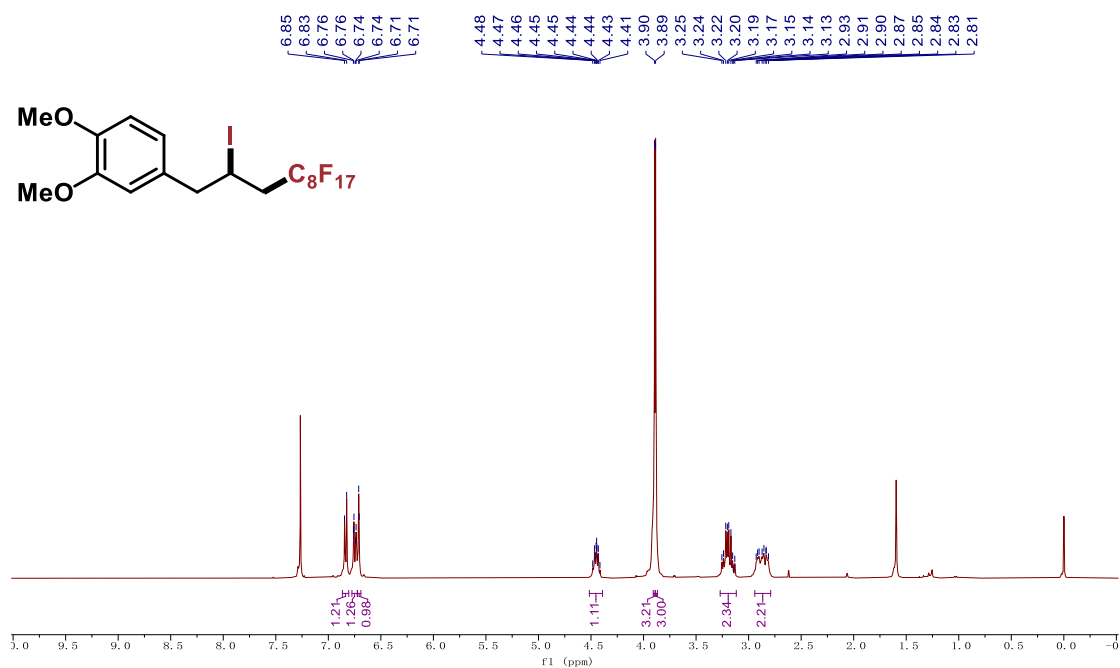

<sup>13</sup>C NMR of compound **21** (101 MHz in CDCl<sub>3</sub>)

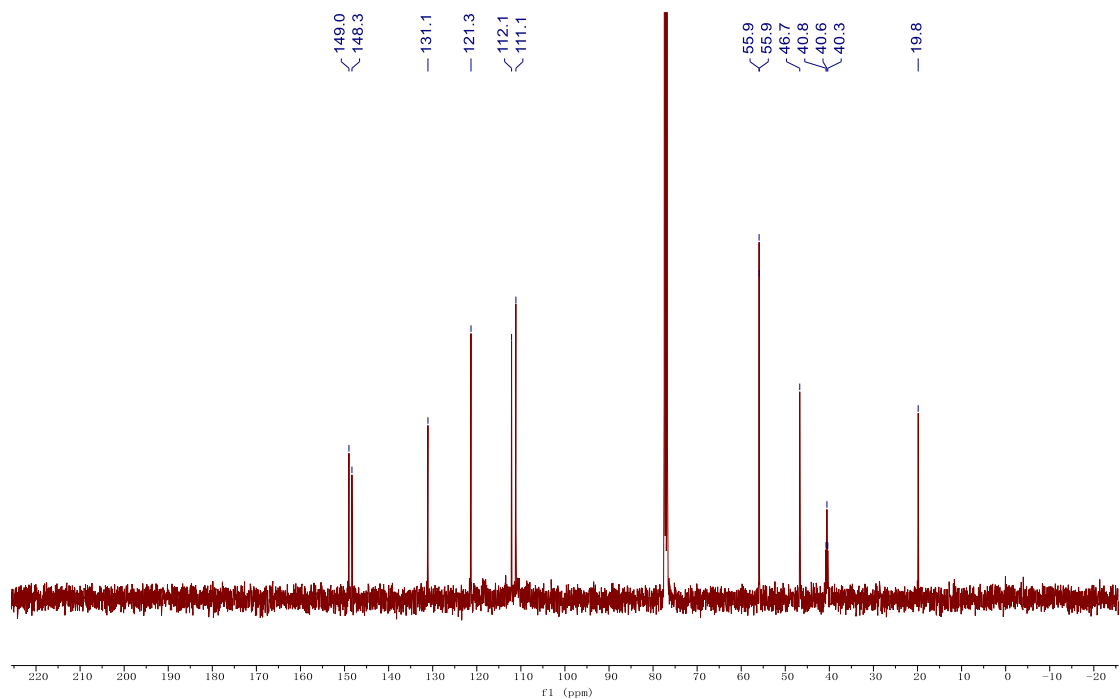

**<sup>19</sup>F NMR of compound 21 (376 MHz in CDCl<sub>3</sub>)**

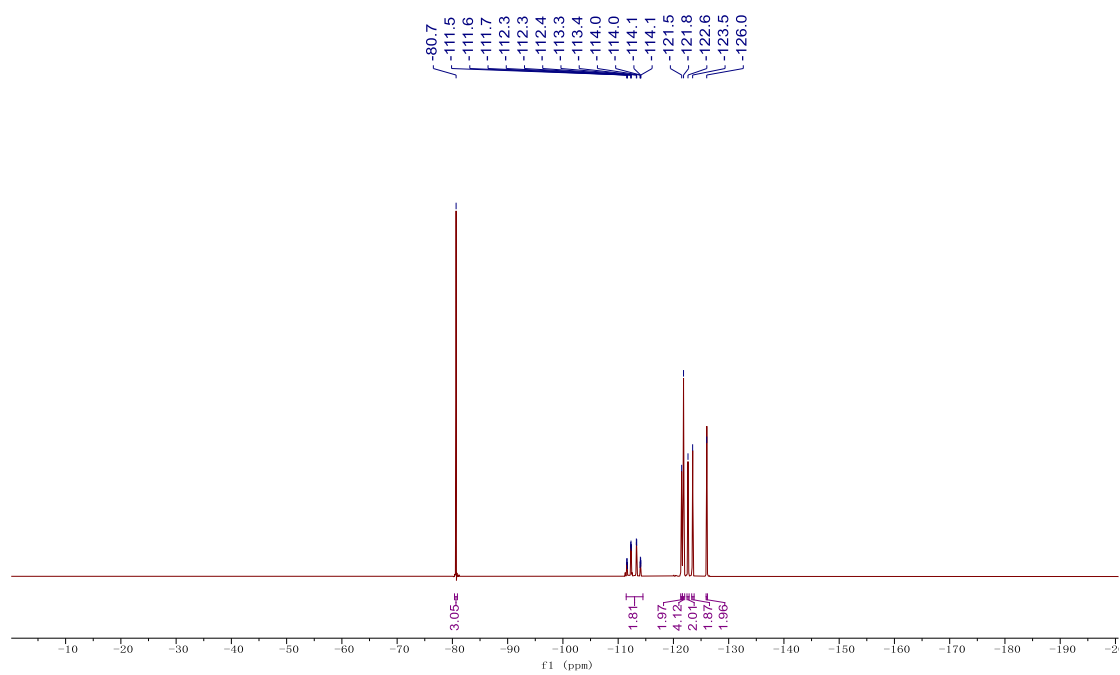

<sup>1</sup>H NMR of compound 22 (400 MHz in CDCl<sub>3</sub>)

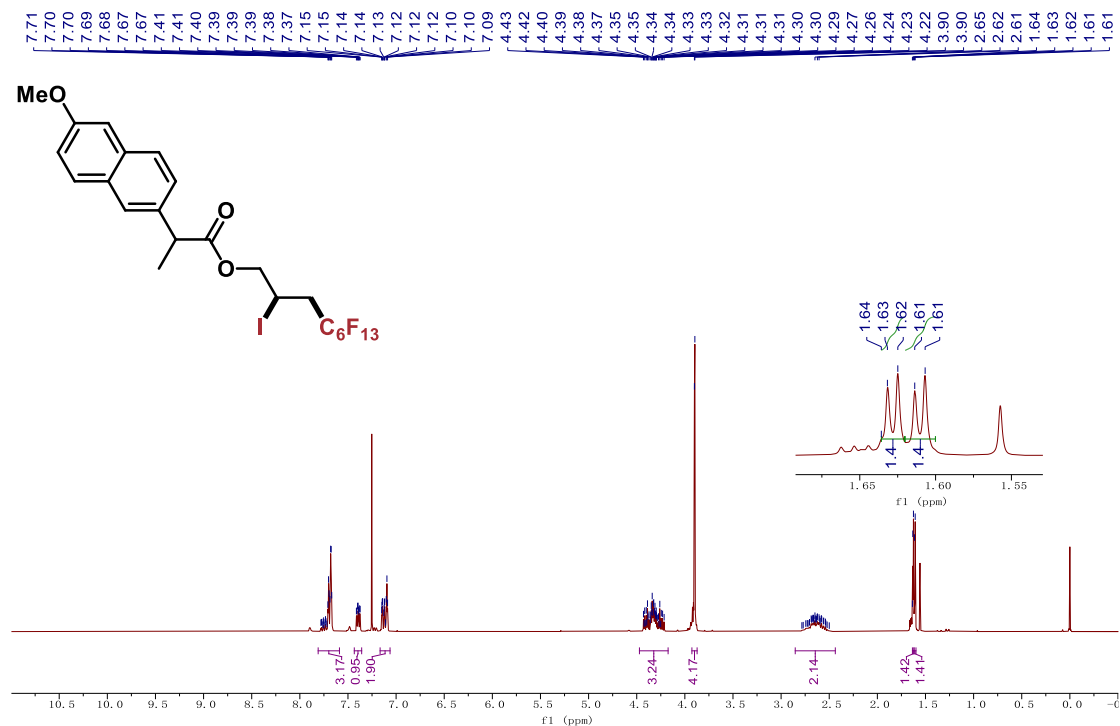

<sup>13</sup>C NMR of compound 22 (101 MHz in CDCl<sub>3</sub>)

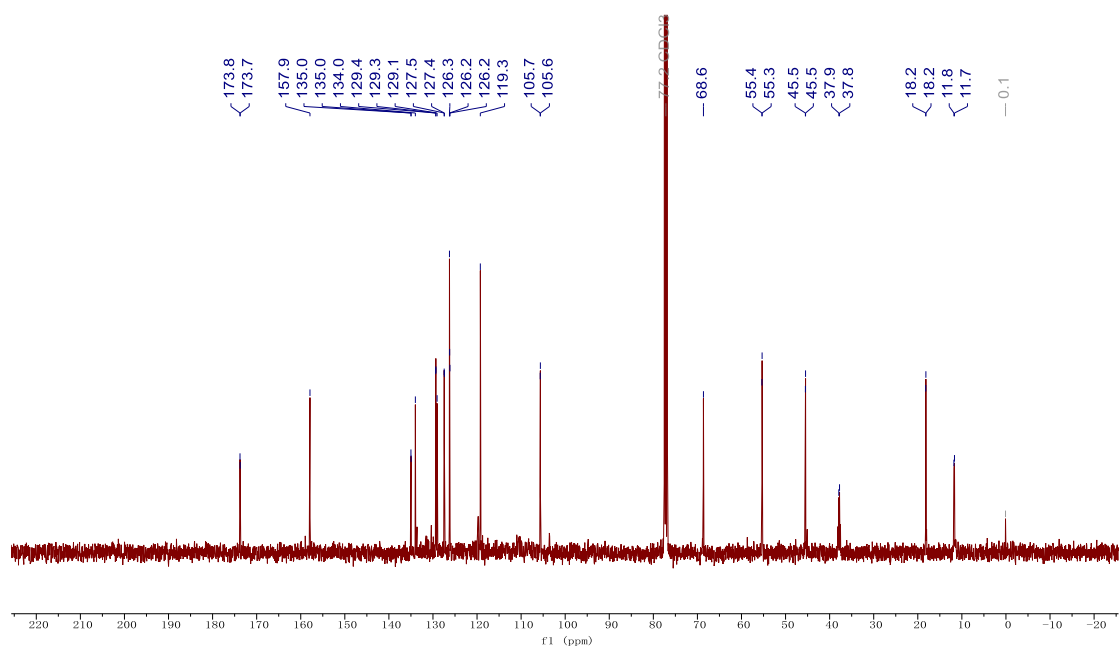

**<sup>19</sup>F NMR of compound 22 (376 MHz in CDCl<sub>3</sub>)**

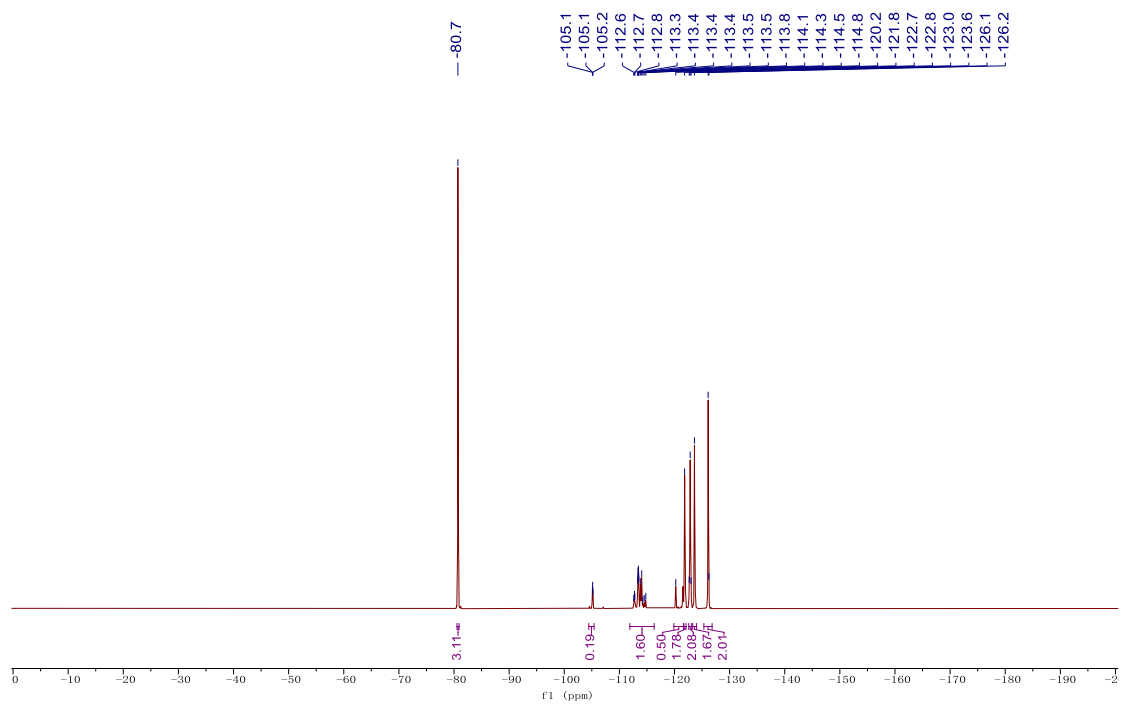

<sup>1</sup>H NMR of compound 23 (400 MHz in CDCl<sub>3</sub>)

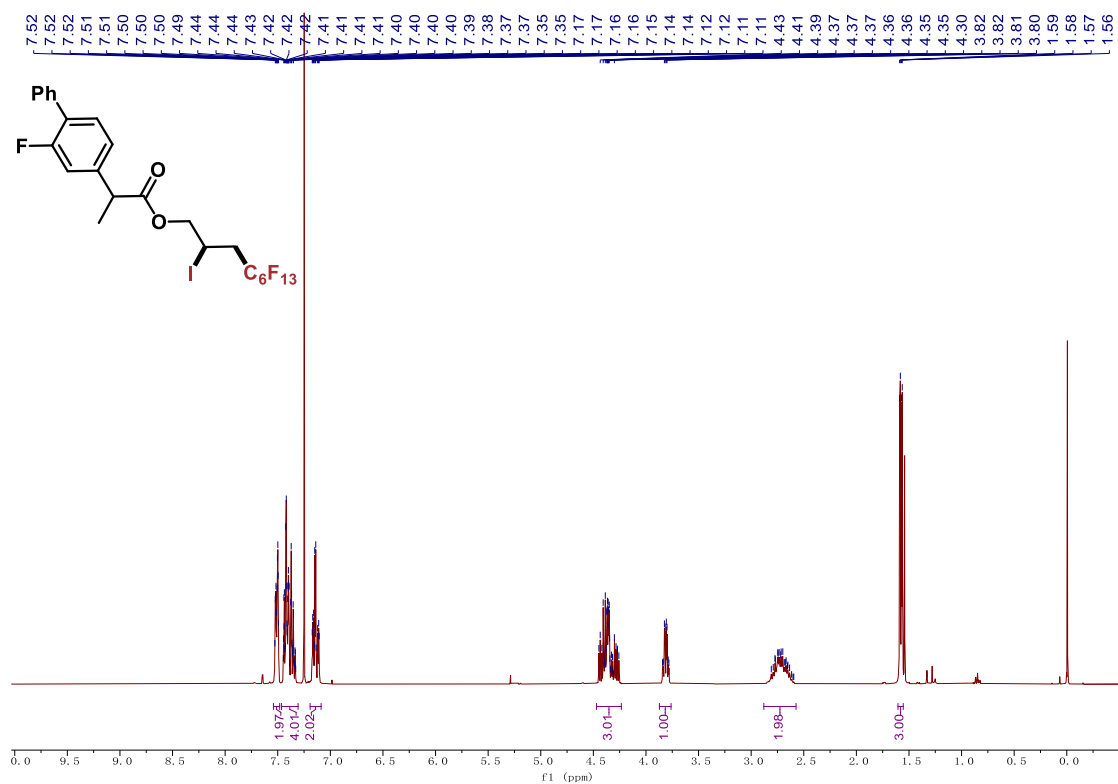

<sup>13</sup>C NMR of compound 23 (101 MHz in CDCl<sub>3</sub>)

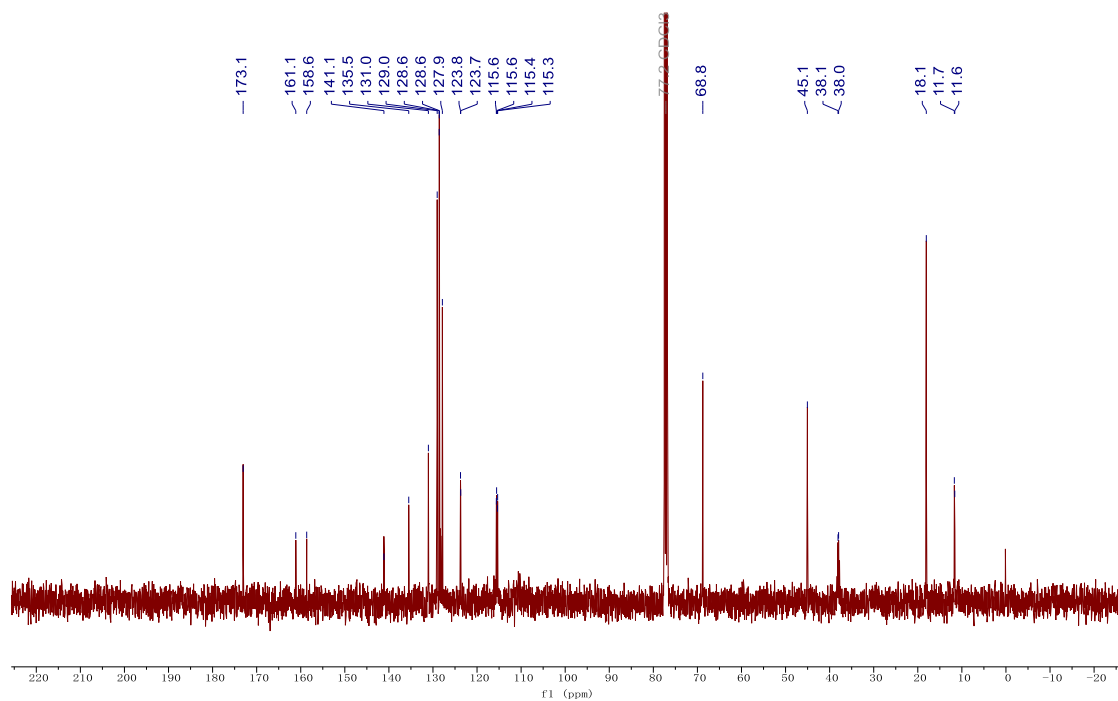

**<sup>19</sup>F NMR of compound 23 (376 MHz in CDCl<sub>3</sub>)**

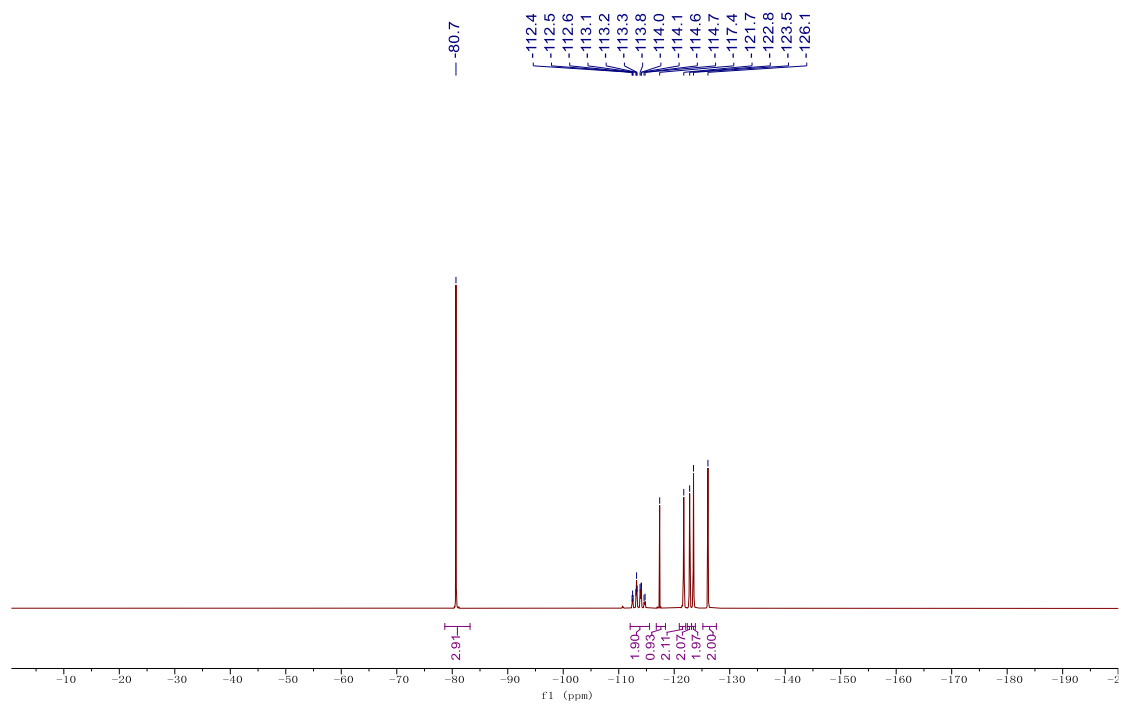



<sup>1</sup>H NMR of compound 24 (400 MHz in CDCl<sub>3</sub>)

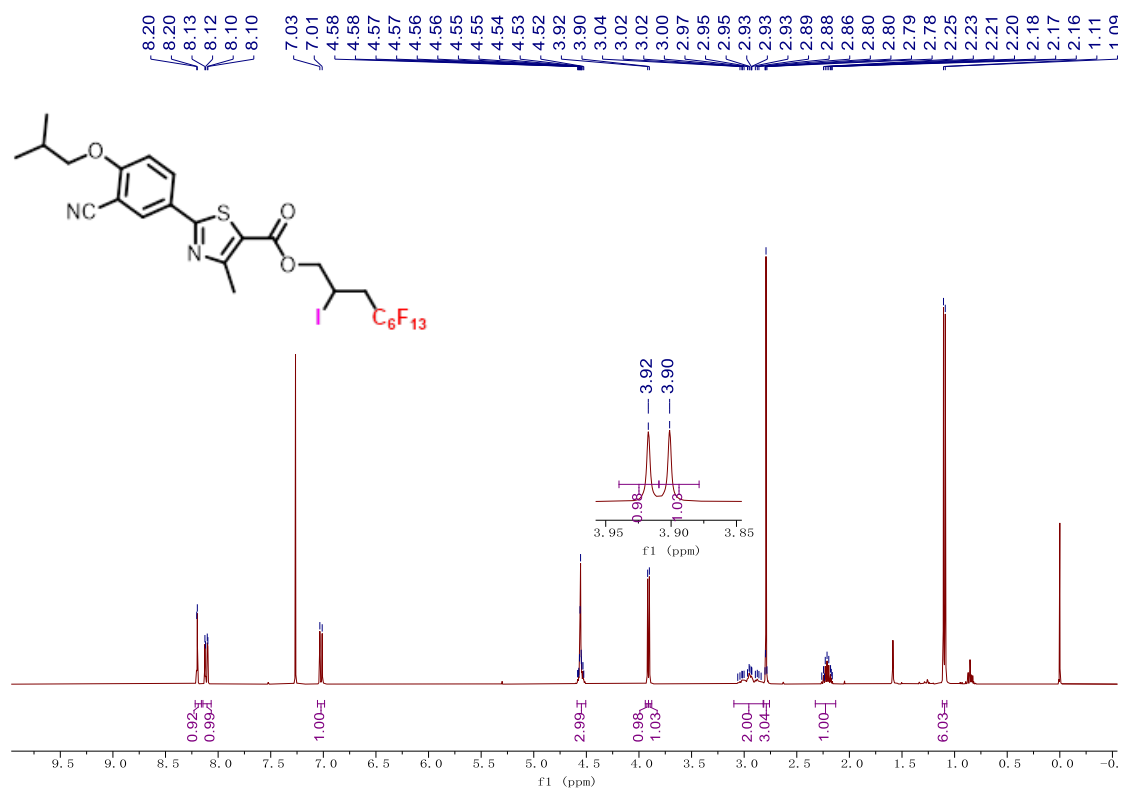

<sup>13</sup>C NMR of compound 24 (101 MHz in CDCl<sub>3</sub>)

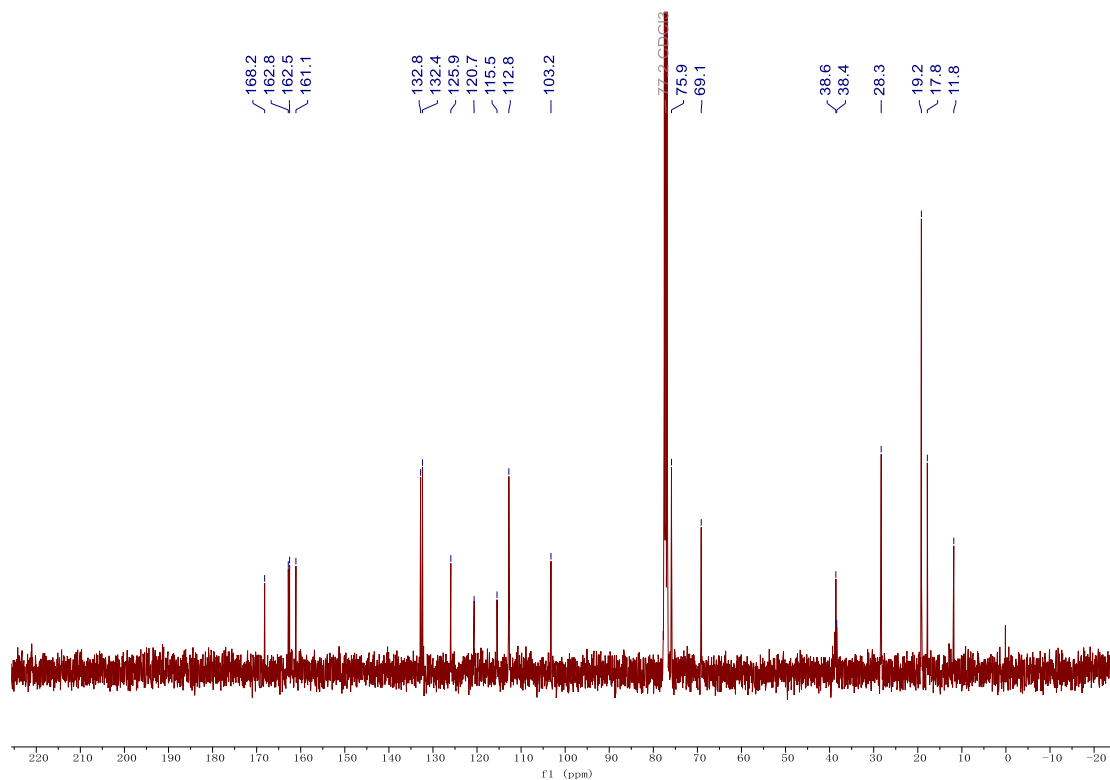

**<sup>19</sup>F NMR of compound 24 (376 MHz in CDCl<sub>3</sub>)**

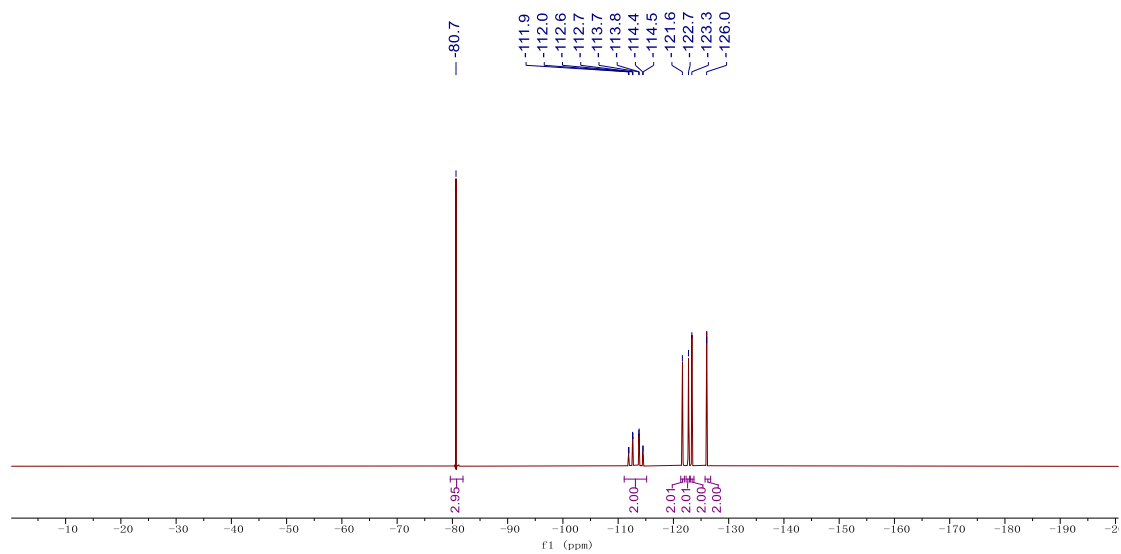

**<sup>1</sup>H NMR of compound 25 (400 MHz in CDCl<sub>3</sub>)**

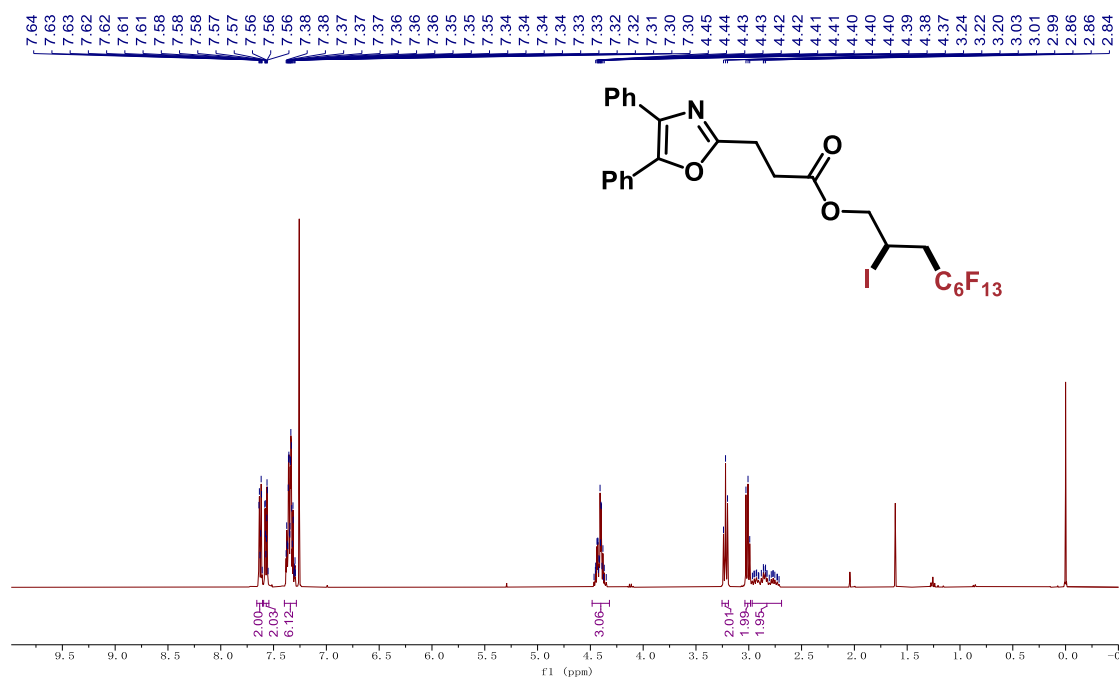

**<sup>13</sup>C NMR of compound 25 (101 MHz in CDCl<sub>3</sub>)**

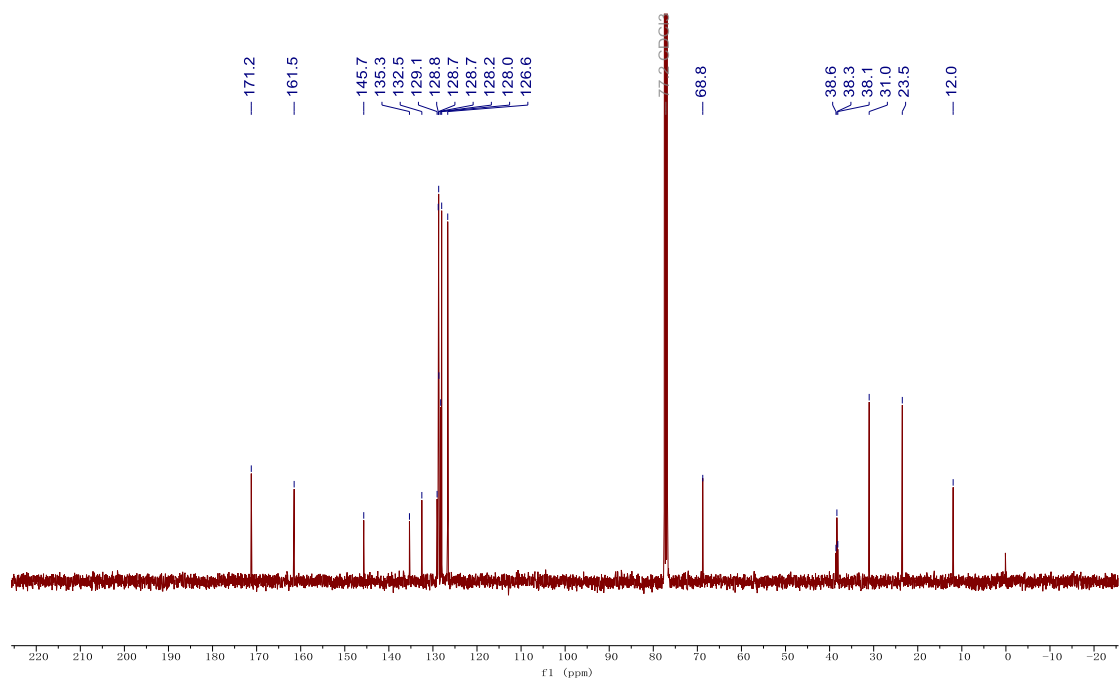

**<sup>19</sup>F NMR of compound 25 (471 MHz in CDCl<sub>3</sub>)**

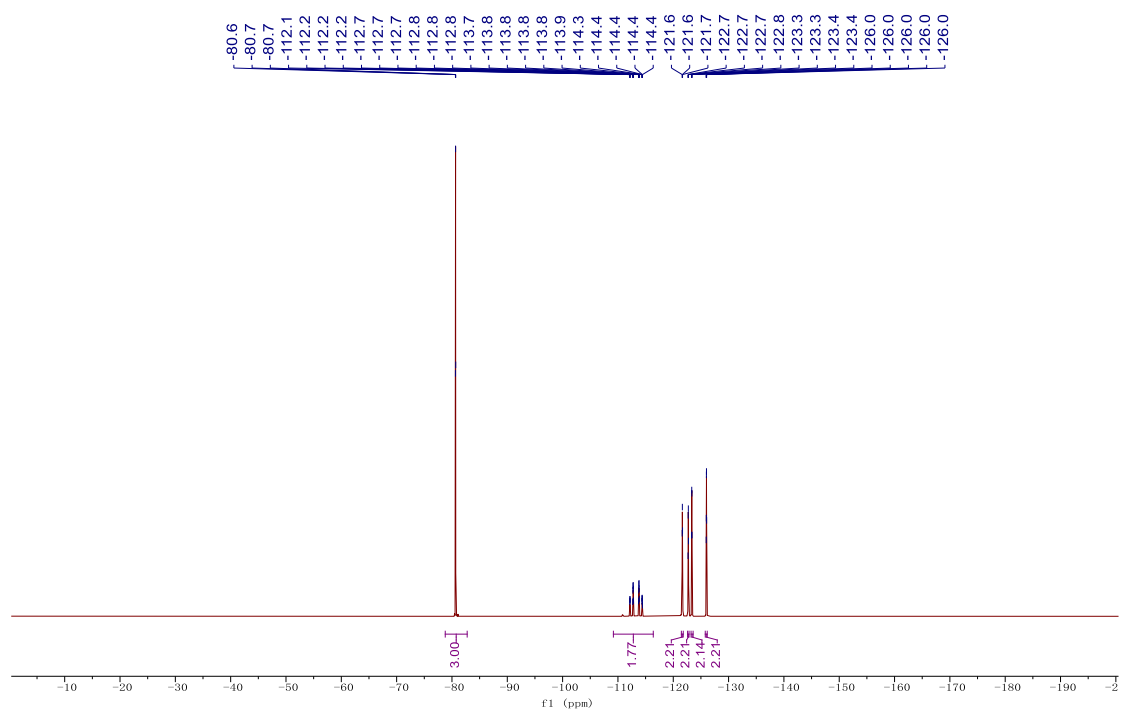

**<sup>1</sup>H NMR of compound 26 (400 MHz in CDCl<sub>3</sub>)**

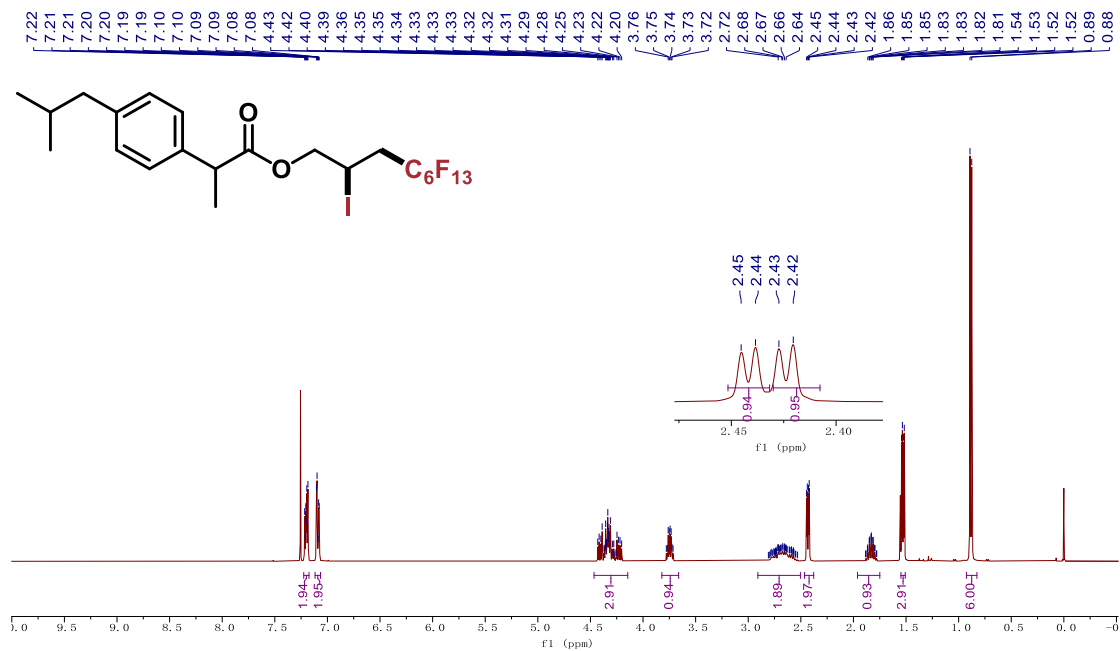

**<sup>13</sup>C NMR of compound 26 (101 MHz in CDCl<sub>3</sub>)**

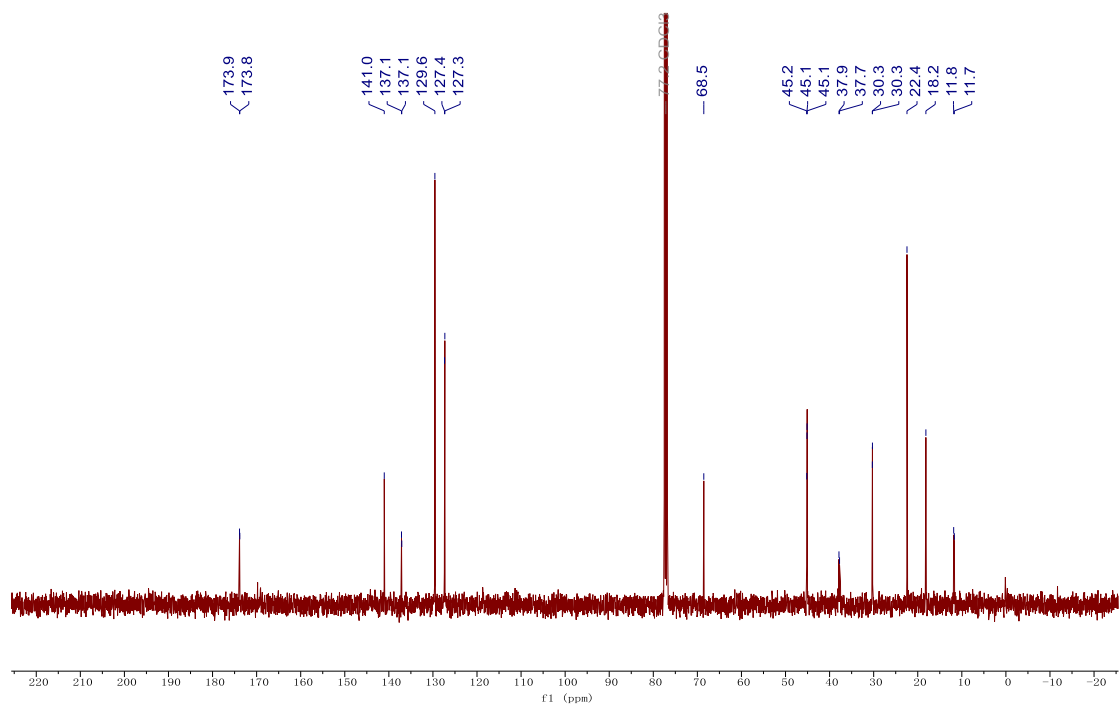

**<sup>19</sup>F NMR of compound 26 (376 MHz in CDCl<sub>3</sub>)**

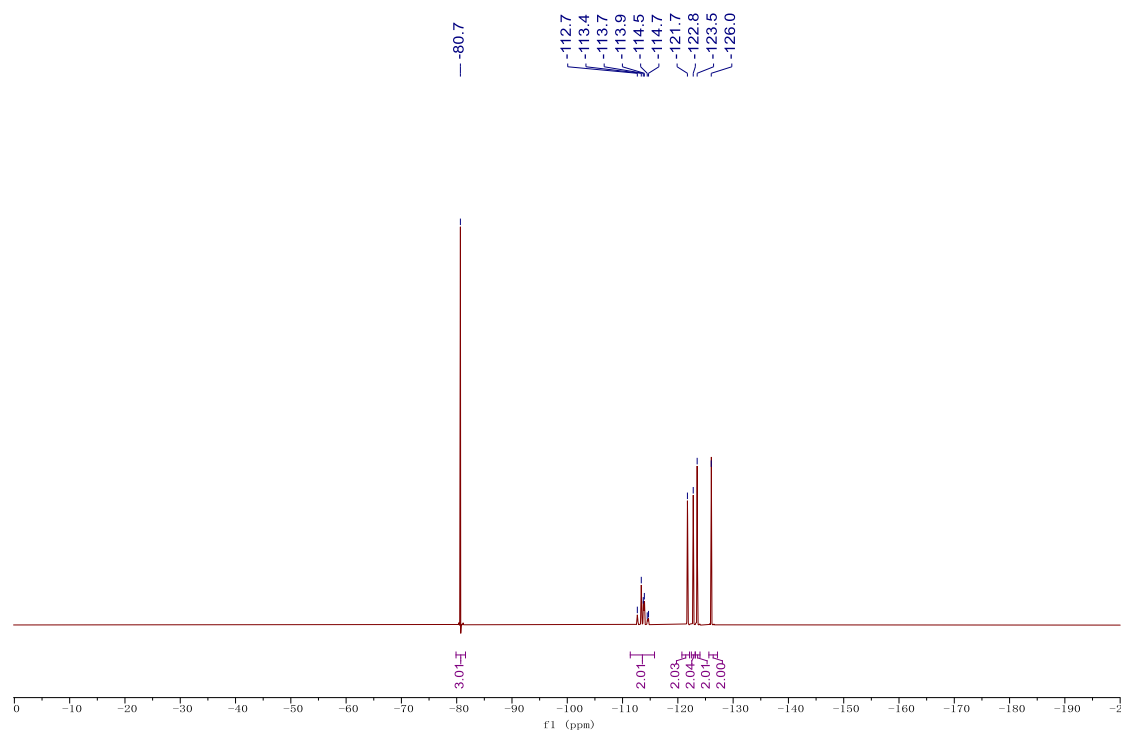

## 7. Computational Details

All the calculations were carried out by using Gaussian16 program.<sup>13</sup> The structures were optimized at B3LYP<sup>14</sup>-D3BJ<sup>15</sup>/BSI level with the implicit solvation model SMD<sup>16</sup> in toluene solvent, BSI denoting a basis set with SDD<sup>17</sup> for I atom and 6-31G(d,p) for other atoms. The Coulomb radius for iodine in the SMD model was modified with 2.74 Å.<sup>18</sup> Harmonic vibrational frequencies were calculated at the same level to confirm that the minima have no imaginary frequency and transition states have unique one imaginary frequency, and obtain the thermal corrections simultaneously. The energies were further refined by the single-point-energy calculations at the B3LYP-D3BJ/BSII level with the same solvation model as the geometry optimizations, BSII representing a basis set with SDD for I atom and 6-311++G(d,p) for other atoms.

### Cartesian Coordinates and Energetic Results of Optimized Structures

Coordinates are in Å, SCF energies and Gibbs free energy corrections ( $G_{\text{corr}}$  at 298.15 K) are in a.u. in toluene solvent.

|                                            |                  |           |           |           |
|--------------------------------------------|------------------|-----------|-----------|-----------|
| C <sub>6</sub> F <sub>13</sub> I           | F                | -5.400779 | 0.130266  | -0.464915 |
| B3LYP-D3BJ/BSI SCF energy:                 | F                | -4.252535 | -1.694761 | -0.150480 |
| -1537.946257                               | F                | -4.482474 | -0.252017 | 1.469777  |
| $G_{\text{corr}}$ at B3LYP-D3BJ/BSI level: | F                | -3.100100 | 0.407891  | -1.682022 |
| 0.024938                                   | F                | -3.098226 | 1.604868  | 0.170473  |
| B3LYP-D3BJ/BSII SCF energy:                | F                | -1.839016 | -0.719505 | 1.385565  |
| -1538.459413                               | F                | -1.558991 | -1.428603 | -0.682045 |
|                                            | F                | -0.582412 | 1.283902  | -1.199580 |
| C -4.333552 -0.391563 0.149190             | F                | -0.512814 | 1.465437  | 0.993725  |
| C -3.061721 0.350031 -0.334350             | F                | 0.809354  | -1.132228 | 0.925606  |
| C -1.736306 -0.335416 0.093026             | F                | 0.985085  | -0.775654 | -1.244097 |
| C -0.496451 0.595599 -0.039457             | F                | 2.039223  | 1.172660  | 1.482954  |
| C 0.851775 -0.187447 -0.039084             | F                | 2.042685  | 1.765232  | -0.616845 |
| C 2.077569 0.723616 0.224782               |                  |           |           |           |
| I 3.976436 -0.395780 -0.072032             | H <sub>2</sub> O |           |           |           |

|                                                           |                                            |           |           |           |
|-----------------------------------------------------------|--------------------------------------------|-----------|-----------|-----------|
| B3LYP-D3BJ/BSI SCF energy:                                | F                                          | 3.486291  | 1.512620  | -0.076330 |
| -76.422754                                                | F                                          | 3.383728  | 0.069925  | -1.741163 |
| G <sub>corr</sub> at B3LYP-D3BJ/BSI level:                | F                                          | 1.768428  | -1.518508 | -0.473702 |
| 0.003622                                                  | F                                          | 2.131202  | -0.547902 | 1.471216  |
| B3LYP-D3BJ/BSII SCF energy:                               | F                                          | 0.911350  | 1.628393  | 0.804588  |
| -76.463532                                                | F                                          | 0.937756  | 1.156441  | -1.345885 |
|                                                           | F                                          | -0.739386 | -0.789354 | -1.119523 |
| O                                                         | F                                          | -0.543842 | -0.899069 | 1.075034  |
| H                                                         | F                                          | -1.637377 | 1.871873  | -0.774109 |
| H                                                         | F                                          | -1.637701 | 1.508738  | 1.382885  |
|                                                           | O                                          | -6.234895 | -1.455929 | -0.218365 |
| C <sub>6</sub> F <sub>13</sub> I_H <sub>2</sub> O_complex | H                                          | -6.121747 | -2.313292 | 0.215097  |
| B3LYP-D3BJ/BSI SCF energy:                                | H                                          | -6.336670 | -1.672291 | -1.155693 |
| -1614.380303                                              |                                            |           |           |           |
| G <sub>corr</sub> at B3LYP-D3BJ/BSI level:                | C <sub>6</sub> F <sub>13</sub> I*          |           |           |           |
| 0.041471                                                  | B3LYP-D3BJ/BSI SCF energy:                 |           |           |           |
| B3LYP-D3BJ/BSII SCF energy:                               | -1538.050956                               |           |           |           |
| -1614.929950                                              | G <sub>corr</sub> at B3LYP-D3BJ/BSI level: |           |           |           |
|                                                           | 0.020398                                   |           |           |           |
| C                                                         | B3LYP-D3BJ/BSII SCF energy:                |           |           |           |
| C                                                         | -1538.572529                               |           |           |           |
| C                                                         |                                            |           |           |           |
| C                                                         | C                                          | -4.475534 | -0.586992 | 0.143609  |
| C                                                         | C                                          | -3.268976 | 0.270646  | -0.311643 |
| C                                                         | C                                          | -1.888788 | -0.327452 | 0.072139  |
| I                                                         | C                                          | -0.722322 | 0.694396  | -0.014723 |
| F                                                         | C                                          | 0.700113  | 0.063494  | -0.038900 |
| F                                                         | C                                          | 1.843917  | 1.030932  | 0.168618  |
| F                                                         | I                                          | 4.515008  | -0.526495 | -0.044308 |



F -5.589763 -0.114661 -0.433154  
 F -4.310407 -1.864725 -0.223699  
 F -4.625408 -0.528027 1.471043  
 F -3.335730 0.387294 -1.656116  
 F -3.410831 1.495101 0.249302  
 F -1.965645 -0.788126 1.344320  
 F -1.652138 -1.368854 -0.757847  
 F -0.884766 1.433980 -1.141476  
 F -0.826067 1.513777 1.060871  
 F 0.732652 -0.879224 0.940308  
 F 0.839872 -0.531998 -1.250207  
 F 1.827740 1.569661 1.401754  
 F 1.819836 2.012925 -0.756911

H<sub>2</sub>O<sup>••</sup>

B3LYP-D3BJ/BSI SCF energy:

-76.041605

G<sub>corr</sub> at B3LYP-D3BJ/BSI level:

-0.000001

B3LYP-D3BJ/BSII SCF energy:

-76.066228

O 0.000000 0.000000 0.117500

H 0.000000 0.825367 -0.469999

H 0.000000 -0.825367 -0.469999

(H<sub>2</sub>O)<sub>4</sub>

B3LYP-D3BJ/BSI SCF energy:

-305.756723

G<sub>corr</sub> at B3LYP-D3BJ/BSI level:

0.067794

B3LYP-D3BJ/BSII SCF energy:

-305.896834

O -0.817480 1.710056 0.020308

H 0.150542 1.482839 0.028053

H -0.960010 2.146187 -0.830016

O -1.710064 -0.817464 -0.020299

H -2.146232 -0.959864 0.830037

H -1.482948 0.150595 -0.028149

O 0.817464 -1.710009 0.020296

H -0.150625 -1.483048 0.028168

H 0.959855 -2.146270 -0.829996

O 1.710115 0.817459 -0.020304

H 1.482922 -0.150588 -0.028184

H 2.146213 0.959807 0.830080

(H<sub>2</sub>O)<sub>4</sub><sup>••</sup>

B3LYP-D3BJ/BSI SCF energy:

-305.461374

G<sub>corr</sub> at B3LYP-D3BJ/BSI level:

0.063322

B3LYP-D3BJ/BSII SCF energy:

-305.581067

O 1.683334 0.828809 -0.063030

H 0.214774 1.307937 0.030202

H 2.060537 0.704477 0.834001

|                                            |           |           |           |   |           |           |           |
|--------------------------------------------|-----------|-----------|-----------|---|-----------|-----------|-----------|
| O                                          | 0.906562  | -1.384188 | -0.019908 | C | 1.502986  | 0.657905  | 0.495039  |
| H                                          | 1.401283  | -1.956465 | 0.589272  | C | 0.165812  | -0.073923 | 0.807828  |
| H                                          | 1.328937  | -1.499420 | -0.886554 | C | -0.864730 | 0.757831  | 1.607755  |
| O                                          | -1.719332 | -0.763335 | -0.066947 | F | 5.968359  | 0.146154  | -1.571612 |
| H                                          | -0.896390 | -1.301163 | -0.018614 | F | 5.690861  | -0.501453 | 0.486129  |
| H                                          | -2.324680 | -1.060386 | 0.630171  | F | 4.853166  | -1.677306 | -1.149509 |
| O                                          | -0.796533 | 1.474432  | 0.079684  | F | 4.102095  | 1.561233  | -0.023629 |
| H                                          | -1.305467 | 0.489066  | 0.021282  | F | 3.431129  | 0.665053  | -1.923849 |
| H                                          | -1.071241 | 2.070216  | -0.638163 | F | 2.153146  | -1.262108 | -0.750378 |
|                                            |           |           |           | F | 3.129996  | -0.905342 | 1.192236  |
| <b>I'</b>                                  |           |           |           | F | 1.922004  | 1.342399  | 1.581494  |
| B3LYP-D3BJ/SDD SCF energy:                 |           |           |           | F | 1.280525  | 1.527542  | -0.517762 |
| -11.393961                                 |           |           |           | F | -0.375339 | -0.439730 | -0.378047 |
| G <sub>corr</sub> at B3LYP-D3BJ/SDD level: |           |           |           | F | 0.445729  | -1.199175 | 1.524284  |
| -0.017503                                  |           |           |           | F | -0.952982 | 1.973799  | 0.995495  |
|                                            |           |           |           | F | -0.329851 | 0.962403  | 2.850311  |
| I                                          | 0.000000  | 0.000000  | 0.000000  | C | -4.312132 | 3.372876  | -0.257539 |
|                                            |           |           |           | C | -3.851166 | 2.274113  | 0.457648  |
| <b>1_Alk'</b>                              |           |           |           | C | -3.559125 | 1.047998  | -0.186081 |
| B3LYP-D3BJ/BSI SCF energy:                 |           |           |           | C | -3.727200 | 0.999994  | -1.591912 |
| -2067.325472                               |           |           |           | C | -4.179064 | 2.104544  | -2.304067 |
| G <sub>corr</sub> at B3LYP-D3BJ/BSI level: |           |           |           | C | -4.481343 | 3.298029  | -1.642734 |
| 0.229359                                   |           |           |           | H | -4.542154 | 4.294517  | 0.269122  |
| B3LYP-D3BJ/BSII SCF energy:                |           |           |           | H | -3.737005 | 2.362413  | 1.532050  |
| -2067.961839                               |           |           |           | H | -3.465830 | 0.091433  | -2.122340 |
|                                            |           |           |           | H | -4.283965 | 2.038427  | -3.383111 |
| C                                          | 5.117075  | -0.436024 | -0.719241 | H | -4.835400 | 4.160264  | -2.199387 |
| C                                          | 3.814275  | 0.400450  | -0.656816 | C | -3.065233 | -0.110112 | 0.545124  |
| C                                          | 2.645776  | -0.311615 | 0.076204  | C | -2.238316 | 0.111890  | 1.785917  |

|                                            |           |           |           |   |           |           |           |
|--------------------------------------------|-----------|-----------|-----------|---|-----------|-----------|-----------|
| H                                          | -2.083308 | -0.819057 | 2.332718  | C | -0.144558 | 0.693872  | -1.469501 |
| H                                          | -2.752821 | 0.785915  | 2.481575  | F | -7.183099 | -0.128206 | 1.171975  |
| C                                          | -3.387898 | -1.464614 | 0.140494  | F | -6.609981 | -1.160865 | -0.654949 |
| C                                          | -4.583823 | -1.747558 | -0.570578 | F | -5.825122 | -1.829129 | 1.268098  |
| C                                          | -2.562557 | -2.569858 | 0.472011  | F | -5.327399 | 1.153727  | -0.513570 |
| C                                          | -4.920721 | -3.044307 | -0.935856 | F | -4.777915 | 0.804498  | 1.593324  |
| H                                          | -5.263510 | -0.936343 | -0.803258 | F | -3.163686 | -1.138896 | 1.021265  |
| C                                          | -2.903898 | -3.864227 | 0.098387  | F | -3.950194 | -1.369727 | -1.024154 |
| H                                          | -1.624983 | -2.413772 | 0.990626  | F | -2.960234 | 0.873332  | -1.838647 |
| C                                          | -4.082740 | -4.114847 | -0.609041 | F | -2.593816 | 1.617527  | 0.202760  |
| H                                          | -5.850554 | -3.224084 | -1.467834 | F | -0.718275 | -0.088882 | 0.681061  |
| H                                          | -2.239342 | -4.684268 | 0.354636  | F | -1.223104 | -1.356353 | -1.053608 |
| H                                          | -4.346510 | -5.127921 | -0.896501 | F | -0.243358 | 2.011643  | -1.141678 |
|                                            |           |           |           | F | -0.522570 | 0.555628  | -2.769632 |
| <b><sup>os</sup>IM1</b>                    |           |           |           | C | 2.771352  | 4.026440  | 0.096129  |
| B3LYP-D3BJ/BSI SCF energy:                 |           |           |           | C | 2.541104  | 2.749804  | -0.395585 |
| -2078.758894                               |           |           |           | C | 2.184128  | 1.698977  | 0.481070  |
| G <sub>corr</sub> at B3LYP-D3BJ/BSI level: |           |           |           | C | 2.027548  | 1.990280  | 1.858012  |
| 0.225347                                   |           |           |           | C | 2.232156  | 3.277198  | 2.336432  |
| B3LYP-D3BJ/BSII SCF energy:                |           |           |           | C | 2.613664  | 4.295894  | 1.459421  |
| -2079.388930                               |           |           |           | H | 3.078828  | 4.815380  | -0.582104 |
| spin contaminant:                          |           |           |           | H | 2.694830  | 2.552485  | -1.449829 |
| before annihilation 0.0747, after 0.0004   |           |           |           | H | 1.691462  | 1.207438  | 2.528153  |
|                                            |           |           |           | H | 2.086347  | 3.489847  | 3.390435  |
| C                                          | -6.183809 | -0.758791 | 0.545912  | H | 2.781748  | 5.300201  | 1.835443  |
| C                                          | -4.986243 | 0.213723  | 0.397584  | C | 1.948298  | 0.352062  | 0.000588  |
| C                                          | -3.669700 | -0.478710 | -0.045959 | C | 1.290088  | 0.180353  | -1.339186 |
| C                                          | -2.603954 | 0.518261  | -0.586046 | H | 1.303492  | -0.855589 | -1.672865 |
| C                                          | -1.167616 | -0.076129 | -0.599919 | H | 1.860397  | 0.747800  | -2.083017 |

|                                            |           |           |           |   |           |           |           |
|--------------------------------------------|-----------|-----------|-----------|---|-----------|-----------|-----------|
| C                                          | 2.389317  | -0.773649 | 0.728024  | F | -7.196716 | -0.037669 | 1.093539  |
| C                                          | 3.464782  | -0.644388 | 1.668180  | F | -6.609416 | -1.113502 | -0.703805 |
| C                                          | 1.839606  | -2.079172 | 0.519773  | F | -5.858921 | -1.750732 | 1.243291  |
| C                                          | 3.868301  | -1.736263 | 2.437677  | F | -5.301978 | 1.188538  | -0.592568 |
| H                                          | 3.940670  | 0.314182  | 1.805146  | F | -4.788198 | 0.878967  | 1.529459  |
| C                                          | 2.260264  | -3.144079 | 1.280747  | F | -3.186448 | -1.093435 | 1.022733  |
| H                                          | 1.028544  | -2.220871 | -0.182706 | F | -3.946354 | -1.359072 | -1.028986 |
| C                                          | 3.268560  | -2.972922 | 2.254583  | F | -2.918909 | 0.855781  | -1.874828 |
| H                                          | 4.676014  | -1.615077 | 3.150784  | F | -2.574027 | 1.637449  | 0.156284  |
| H                                          | 1.805811  | -4.119411 | 1.142670  | F | -0.719171 | -0.067153 | 0.694954  |
| H                                          | 3.587133  | -3.823411 | 2.849148  | F | -1.220938 | -1.381658 | -1.004551 |
| I                                          | 5.841371  | -0.595449 | -0.528094 | F | -0.213991 | 1.973209  | -1.187763 |
|                                            |           |           |           | F | -0.474912 | 0.465390  | -2.770606 |
| <b>osTS1</b>                               |           |           |           | C | 2.675125  | 4.016219  | 0.129774  |
| B3LYP-D3BJ/BSI SCF energy:                 |           |           |           | C | 2.467687  | 2.737621  | -0.361978 |
| -2078.758644                               |           |           |           | C | 2.166653  | 1.671305  | 0.520012  |
| G <sub>corr</sub> at B3LYP-D3BJ/BSI level: |           |           |           | C | 2.046336  | 1.950509  | 1.905084  |
| 0.227636                                   |           |           |           | C | 2.227883  | 3.239950  | 2.383980  |
| B3LYP-D3BJ/BSII SCF energy:                |           |           |           | C | 2.551364  | 4.272898  | 1.500096  |
| -2079.388026                               |           |           |           | H | 2.941725  | 4.817025  | -0.551519 |
| spin contaminant:                          |           |           |           | H | 2.603853  | 2.547032  | -1.419202 |
| before annihilation 0.0515, after 0.0001   |           |           |           | H | 1.753191  | 1.155432  | 2.580469  |
|                                            |           |           |           | H | 2.109555  | 3.444052  | 3.442952  |
| C                                          | -6.195854 | -0.691536 | 0.494544  | H | 2.702891  | 5.279687  | 1.876608  |
| C                                          | -4.985483 | 0.264820  | 0.343663  | C | 1.950999  | 0.326613  | 0.042884  |
| C                                          | -3.670451 | -0.450956 | -0.065492 | C | 1.313542  | 0.127638  | -1.302886 |
| C                                          | -2.585867 | 0.522534  | -0.610118 | H | 1.329397  | -0.917503 | -1.607003 |
| C                                          | -1.156400 | -0.088865 | -0.590771 | H | 1.906004  | 0.667694  | -2.049210 |
| C                                          | -0.116247 | 0.644750  | -1.471275 | C | 2.389900  | -0.795030 | 0.792098  |

|                                            |           |           |           |   |           |           |           |
|--------------------------------------------|-----------|-----------|-----------|---|-----------|-----------|-----------|
| C                                          | 3.506221  | -0.657295 | 1.674115  | F | 4.868966  | -1.525466 | -0.368066 |
| C                                          | 1.814307  | -2.090627 | 0.631744  | F | 4.444820  | -0.620726 | 1.598001  |
| C                                          | 3.966419  | -1.746521 | 2.406132  | F | 2.983777  | 1.271648  | 0.592789  |
| H                                          | 4.012265  | 0.293556  | 1.747516  | F | 3.691441  | 0.908258  | -1.461906 |
| C                                          | 2.277747  | -3.156769 | 1.372049  | F | 2.481936  | -1.365305 | -1.659267 |
| H                                          | 0.963521  | -2.234123 | -0.021641 | F | 2.136857  | -1.533933 | 0.509348  |
| C                                          | 3.353522  | -2.987210 | 2.264569  | F | 0.455236  | 0.401717  | 0.587727  |
| H                                          | 4.822851  | -1.628200 | 3.060621  | F | 0.986701  | 1.158884  | -1.418143 |
| H                                          | 1.809191  | -4.129679 | 1.269587  | F | -0.255640 | -2.031416 | -0.687194 |
| H                                          | 3.716431  | -3.838007 | 2.832877  | F | 0.084156  | -1.013670 | -2.608333 |
| I                                          | 5.562880  | -0.288545 | -1.024088 | C | -2.900606 | -3.506877 | 1.302944  |
|                                            |           |           |           | C | -3.043477 | -2.383157 | 0.498119  |
| <b>1HI</b>                                 |           |           |           | C | -2.476555 | -1.152190 | 0.866578  |
| B3LYP-D3BJ/BSI SCF energy:                 |           |           |           | C | -1.743191 | -1.090692 | 2.062874  |
| -2078.773621                               |           |           |           | C | -1.595648 | -2.221235 | 2.867135  |
| G <sub>corr</sub> at B3LYP-D3BJ/BSI level: |           |           |           | C | -2.175304 | -3.431391 | 2.495143  |
| 0.230415                                   |           |           |           | H | -3.360532 | -4.442818 | 1.001261  |
| B3LYP-D3BJ/BSII SCF energy:                |           |           |           | H | -3.622280 | -2.453317 | -0.415998 |
| -2079.407724                               |           |           |           | H | -1.263563 | -0.167064 | 2.357035  |
|                                            |           |           |           | H | -1.021492 | -2.148343 | 3.785684  |
| C                                          | 5.929079  | 0.499030  | 0.165763  | H | -2.065811 | -4.308741 | 3.125192  |
| C                                          | 4.647393  | -0.363242 | 0.288311  | C | -2.488765 | 0.032801  | -0.067773 |
| C                                          | 3.376506  | 0.319835  | -0.284564 | C | -1.719289 | -0.258952 | -1.368846 |
| C                                          | 2.204574  | -0.674109 | -0.533494 | H | -1.704409 | 0.610527  | -2.025180 |
| C                                          | 0.825694  | 0.039053  | -0.663557 | H | -2.238751 | -1.049442 | -1.912336 |
| C                                          | -0.288851 | -0.817839 | -1.306113 | C | -2.329832 | 1.385428  | 0.558313  |
| F                                          | 6.899602  | -0.056043 | 0.900220  | C | -2.980416 | 1.662523  | 1.775843  |
| F                                          | 6.332256  | 0.561399  | -1.106796 | C | -1.600567 | 2.416918  | -0.050335 |
| F                                          | 5.699403  | 1.739899  | 0.616616  | C | -2.878285 | 2.911659  | 2.374910  |

|                                            |           |           |           |   |           |           |           |
|--------------------------------------------|-----------|-----------|-----------|---|-----------|-----------|-----------|
| H                                          | -3.589699 | 0.895500  | 2.240123  | F | 3.898135  | 0.422808  | -1.666643 |
| C                                          | -1.496122 | 3.670147  | 0.551724  | F | 2.550101  | -1.738156 | -1.215539 |
| H                                          | -1.090331 | 2.257173  | -0.990089 | F | 2.324935  | -1.315527 | 0.935943  |
| C                                          | -2.130641 | 3.923874  | 1.766155  | F | 0.740728  | 0.687768  | 0.556841  |
| H                                          | -3.391849 | 3.099941  | 3.312628  | F | 1.207404  | 0.840727  | -1.594032 |
| H                                          | -0.915749 | 4.447671  | 0.064908  | F | -0.155107 | -1.948813 | 0.033634  |
| H                                          | -2.051456 | 4.901439  | 2.231658  | F | 0.067173  | -1.500244 | -2.108865 |
| I                                          | -4.750639 | 0.217561  | -0.981597 | C | -2.781739 | -2.405410 | 2.583610  |
|                                            |           |           |           | C | -2.554798 | -1.693049 | 1.418193  |
|                                            |           |           |           | C | -2.222198 | -0.312995 | 1.477344  |
| <b>TS2</b>                                 |           |           |           | C | -2.086699 | 0.301866  | 2.752838  |
| B3LYP-D3BJ/BSI SCF energy:                 |           |           |           | C | -2.286594 | -0.430198 | 3.911083  |
| -2078.761646                               |           |           |           | C | -2.646188 | -1.780525 | 3.828339  |
| G <sub>corr</sub> at B3LYP-D3BJ/BSI level: |           |           |           | H | -3.074055 | -3.448172 | 2.526161  |
| 0.228324                                   |           |           |           | H | -2.707499 | -2.171988 | 0.461504  |
| B3LYP-D3BJ/BSII SCF energy:                |           |           |           | H | -1.763543 | 1.333864  | 2.812223  |
| -2079.390104                               |           |           |           | H | -2.154390 | 0.041036  | 4.879125  |
| C                                          | 6.199503  | 0.303771  | -0.067133 | H | -2.814168 | -2.349530 | 4.737605  |
| C                                          | 4.881202  | -0.414321 | 0.316392  | C | -1.999860 | 0.453796  | 0.287196  |
| C                                          | 3.620395  | 0.180436  | -0.365654 | C | -1.502528 | -0.216778 | -0.954140 |
| C                                          | 2.384317  | -0.762916 | -0.297735 | H | -1.456833 | 0.481488  | -1.788776 |
| C                                          | 1.041139  | -0.025967 | -0.560285 | H | -2.265475 | -0.961098 | -1.244947 |
| C                                          | -0.161184 | -0.946867 | -0.889070 | C | -2.271860 | 1.868230  | 0.263504  |
| F                                          | 7.176769  | -0.119605 | 0.741659  | C | -3.341243 | 2.391690  | 1.036866  |
| F                                          | 6.532952  | 0.027949  | -1.331014 | C | -1.521288 | 2.758345  | -0.546480 |
| F                                          | 6.061694  | 1.629475  | 0.073945  | C | -3.635289 | 3.746034  | 1.006986  |
| F                                          | 5.002988  | -1.716214 | -0.029326 | H | -3.978554 | 1.709899  | 1.586207  |
| F                                          | 4.730921  | -0.317748 | 1.654610  | C | -1.805567 | 4.114378  | -0.544716 |
| F                                          | 3.323756  | 1.349901  | 0.248179  | H | -0.683072 | 2.397428  | -1.128468 |

C -2.864796 4.610946 0.224281  
H -4.477592 4.126889 1.574315  
H -1.206378 4.789775 -1.145930  
H -3.096973 5.671133 0.201305  
I -5.059469 -0.920461 -1.310441

**IM2**

B3LYP-D3BJ/BSI SCF energy:

-2078.765178

G<sub>corr</sub> at B3LYP-D3BJ/BSI level:

0.225184

B3LYP-D3BJ/BSII SCF energy:

-2079.393515

C 6.045718 -0.073316 -0.175851  
C 4.694210 -0.374965 0.519138  
C 3.453234 -0.050973 -0.354607  
C 2.143340 -0.705933 0.171066  
C 0.860210 -0.048595 -0.410607  
C -0.435819 -0.889762 -0.261229  
F 7.027546 -0.155096 0.728676  
F 6.279727 -0.956375 -1.150502  
F 6.034183 1.162920 -0.693941  
F 4.681237 -1.687125 0.846033  
F 4.632622 0.368270 1.644700  
F 3.299598 1.293972 -0.381897  
F 3.674880 -0.495450 -1.612408  
F 2.170849 -2.014504 -0.154643  
F 2.103339 -0.581518 1.518019

F 0.681487 1.136558 0.229230  
F 1.051814 0.203873 -1.732793  
F -0.488522 -1.302828 1.033989  
F -0.305298 -1.983906 -1.051265  
C -3.102701 -0.199736 3.415100  
C -2.809186 -0.175307 2.059376  
C -2.344479 1.020035 1.453490  
C -2.147800 2.168469 2.266977  
C -2.406544 2.117442 3.626464  
C -2.894585 0.936991 4.201242  
H -3.490785 -1.109307 3.860832  
H -3.000424 -1.054958 1.457256  
H -1.741306 3.070262 1.824783  
H -2.223733 2.989839 4.245011  
H -3.105209 0.903324 5.265816  
C -2.074264 1.079158 0.041774  
C -1.682445 -0.126616 -0.702467  
H -1.576617 0.072379 -1.768199  
H -2.537180 -0.879522 -0.644710  
C -2.296321 2.303034 -0.695466  
C -3.329782 3.193577 -0.310320  
C -1.513490 2.622550 -1.832857  
C -3.564639 4.354841 -1.033587  
H -3.974928 2.931877 0.519363  
C -1.738716 3.798728 -2.531072  
H -0.695183 1.977034 -2.127031  
C -2.766660 4.663775 -2.138361  
H -4.376964 5.013904 -0.746162  
H -1.114812 4.046901 -3.383185

H -2.949427 5.574969 -2.699406  
I -4.327175 -2.492759 -0.804951

**TS3**

B3LYP-D3BJ/BSI SCF energy:

-2078.753880

G<sub>corr</sub> at B3LYP-D3BJ/BSI level:

0.218243

B3LYP-D3BJ/BSII SCF energy:

-2079.390383

C 6.086653 0.209723 -0.391964  
C 4.775355 -0.110468 0.368673  
C 3.491332 0.109296 -0.474871  
C 2.232907 -0.576903 0.131177  
C 0.899616 -0.011051 -0.431390  
C -0.356382 -0.895778 -0.176338  
F 7.102296 0.226867 0.478717  
F 6.329520 -0.719533 -1.320892  
F 6.000396 1.410257 -0.981428  
F 4.835597 -1.401886 0.767211  
F 4.720568 0.691169 1.453581  
F 3.277262 1.442036 -0.569156  
F 3.693870 -0.393178 -1.714887  
F 2.317244 -1.898937 -0.130087  
F 2.238636 -0.387925 1.471568  
F 0.702640 1.202345 0.138919  
F 1.023061 0.156937 -1.774583  
F -0.342097 -1.232348 1.142967

F -0.190408 -2.040651 -0.899240  
C -2.344287 0.541088 3.700945  
C -2.359720 0.212508 2.347867  
C -2.152318 1.206790 1.376228  
C -1.936685 2.535269 1.791629  
C -1.892996 2.850985 3.145013  
C -2.101542 1.855112 4.103177  
H -2.522667 -0.232904 4.440594  
H -2.562368 -0.806010 2.043999  
H -1.779253 3.307541 1.046600  
H -1.702208 3.874081 3.453509  
H -2.080350 2.104806 5.159614  
C -2.199222 0.903183 -0.063856  
C -1.612469 -0.210394 -0.644143  
H -1.705927 -0.300257 -1.723293  
H -2.713539 -1.314210 -0.377053  
C -3.003455 1.787333 -0.920196  
C -4.192851 2.363208 -0.432515  
C -2.602899 2.066321 -2.241800  
C -4.971326 3.171340 -1.254713  
H -4.511983 2.149190 0.581045  
C -3.375360 2.890365 -3.052937  
H -1.661369 1.672400 -2.609933  
C -4.564512 3.437781 -2.564250  
H -5.896764 3.592648 -0.875259  
H -3.047520 3.112949 -4.063363  
H -5.169448 4.075999 -3.201021  
I -3.904583 -2.655601 -0.232718



|                                            |           |           |           |                                            |           |           |           |
|--------------------------------------------|-----------|-----------|-----------|--------------------------------------------|-----------|-----------|-----------|
| <b>3</b>                                   | C         | -3.210576 | 1.262898  | 0.070203                                   |           |           |           |
| B3LYP-D3BJ/BSI SCF energy:                 | C         | -2.271651 | 1.986326  | -0.678574                                  |           |           |           |
| -2066.732735                               | C         | -2.370405 | 3.372382  | -0.785085                                  |           |           |           |
| G <sub>corr</sub> at B3LYP-D3BJ/BSI level: | C         | -3.404737 | 4.055466  | -0.143729                                  |           |           |           |
| 0.218849                                   | H         | -5.158335 | 3.866215  | 1.098158                                   |           |           |           |
| B3LYP-D3BJ/BSII SCF energy:                | H         | -5.003032 | 1.401894  | 1.258612                                   |           |           |           |
| -2067.370944                               | H         | -1.466763 | 1.461264  | -1.177552                                  |           |           |           |
|                                            | H         | -1.637645 | 3.918379  | -1.371730                                  |           |           |           |
|                                            | H         | -3.478051 | 5.135811  | -0.225611                                  |           |           |           |
| C                                          | 5.543240  | -0.250189 | -0.506277 |                                            |           |           |           |
| C                                          | 4.193242  | 0.429309  | -0.165191 | C                                          | -3.157509 | -0.222678 | 0.169778  |
| C                                          | 2.978416  | -0.536206 | -0.199904 | C                                          | -2.085492 | -0.943854 | 0.556737  |
| C                                          | 1.722107  | 0.030217  | 0.520649  | H                                          | -2.127867 | -2.027040 | 0.508912  |
| C                                          | 0.407816  | -0.696904 | 0.129170  | C                                          | -4.403957 | -0.947494 | -0.202441 |
| C                                          | -0.783192 | -0.465855 | 1.105281  | C                                          | -4.799804 | -2.110198 | 0.478845  |
| F                                          | 6.472107  | 0.694760  | -0.692694 | C                                          | -5.207132 | -0.477806 | -1.255120 |
| F                                          | 5.933237  | -1.047342 | 0.492923  | C                                          | -5.953895 | -2.795217 | 0.104684  |
| F                                          | 5.429263  | -0.973470 | -1.628574 | H                                          | -4.213349 | -2.459205 | 1.322700  |
| F                                          | 4.305179  | 0.969059  | 1.070526  | C                                          | -6.356288 | -1.168480 | -1.633166 |
| F                                          | 3.986883  | 1.413963  | -1.065929 | H                                          | -4.918686 | 0.424001  | -1.784157 |
| F                                          | 2.680404  | -0.782293 | -1.496483 | C                                          | -6.733750 | -2.329400 | -0.955481 |
| F                                          | 3.327966  | -1.697296 | 0.401074  | H                                          | -6.250468 | -3.686570 | 0.649403  |
| F                                          | 1.923773  | -0.080787 | 1.852157  | H                                          | -6.958486 | -0.798636 | -2.457602 |
| F                                          | 1.593308  | 1.339514  | 0.197419  | H                                          | -7.634570 | -2.862088 | -1.245072 |
| F                                          | 0.063625  | -0.268780 | -1.113318 |                                            |           |           |           |
| F                                          | 0.642557  | -2.032517 | 0.065685  | HI                                         |           |           |           |
| F                                          | -0.774573 | 0.846926  | 1.465644  | B3LYP-D3BJ/BSI SCF energy:                 |           |           |           |
| F                                          | -0.487337 | -1.195029 | 2.231269  | -12.014282                                 |           |           |           |
| C                                          | -4.349011 | 3.342823  | 0.597960  | G <sub>corr</sub> at B3LYP-D3BJ/BSI level: |           |           |           |
| C                                          | -4.260801 | 1.955796  | 0.692768  | -0.015058                                  |           |           |           |

|                                            |                            |           |           |           |
|--------------------------------------------|----------------------------|-----------|-----------|-----------|
| B3LYP-D3BJ/BSII SCF energy:                | F                          | -0.567131 | 1.026945  | -1.406678 |
| -12.019327                                 | F                          | -0.702631 | 0.747361  | 0.778258  |
|                                            | F                          | 0.359328  | 3.708625  | -0.766516 |
| I 0.000000 0.000000 0.030017               | F                          | -0.351230 | 3.280201  | 1.276284  |
| H 0.000000 0.000000 -1.590904              | C                          | -2.979396 | -1.902038 | -0.015624 |
|                                            | C                          | -3.191700 | -3.174571 | -0.543358 |
| <b>12_Alk*</b>                             | C                          | -4.485881 | -3.695032 | -0.623242 |
| B3LYP-D3BJ/BSI SCF energy:                 | C                          | -5.563689 | -2.932612 | -0.172243 |
| -1914.861082                               | C                          | -5.347498 | -1.658193 | 0.356149  |
| G <sub>corr</sub> at B3LYP-D3BJ/BSI level: | C                          | -4.055724 | -1.127377 | 0.443333  |
| 0.206529                                   | H                          | -1.970955 | -1.500373 | 0.040266  |
| B3LYP-D3BJ/BSII SCF energy:                | H                          | -2.346518 | -3.762713 | -0.889835 |
| -1915.461481                               | H                          | -4.651208 | -4.687545 | -1.032076 |
|                                            | H                          | -6.573350 | -3.329695 | -0.228641 |
| C 3.689824 -2.006913 0.321147              | H                          | -6.190216 | -1.068873 | 0.709225  |
| C 3.203482 -0.665846 -0.283817             | C                          | -3.808825 | 0.265458  | 0.971525  |
| C 1.751670 -0.287431 0.112062              | C                          | -3.610978 | 1.289707  | -0.173649 |
| C 1.412357 1.208920 -0.156317              | H                          | -2.912206 | 0.264074  | 1.597236  |
| C -0.116333 1.478613 -0.207802             | H                          | -4.641556 | 0.586708  | 1.606751  |
| C -0.529005 2.962708 -0.037257             | C                          | -3.025585 | 2.583582  | 0.283783  |
| F 4.842628 -2.354886 -0.261676             | H                          | -2.971270 | 0.845689  | -0.943206 |
| F 3.891224 -1.882905 1.636330              | H                          | -4.587737 | 1.449098  | -0.661544 |
| F 2.784647 -2.970525 0.102431              | C                          | -1.955582 | 3.292704  | -0.480820 |
| F 4.047647 0.305170 0.135411               | H                          | -3.324090 | 2.992084  | 1.245269  |
| F 3.271436 -0.769130 -1.628112             | H                          | -2.014241 | 3.074841  | -1.551788 |
| F 0.907899 -1.076140 -0.596328             | H                          | -2.028157 | 4.379919  | -0.357202 |
| F 1.581623 -0.534651 1.430715              |                            |           |           |           |
| F 1.968241 1.944671 0.831047               |                            |           |           |           |
| F 1.953950 1.571567 -1.342020              |                            |           |           |           |
|                                            | <b>12HI</b>                |           |           |           |
|                                            | B3LYP-D3BJ/BSI SCF energy: |           |           |           |

|                                            |           |           |           |                                            |           |           |           |
|--------------------------------------------|-----------|-----------|-----------|--------------------------------------------|-----------|-----------|-----------|
| -1914.286994                               |           | C         | 7.129696  | 0.327103                                   | 1.148798  |           |           |
| G <sub>corr</sub> at B3LYP-D3BJ/BSI level: |           | C         | 6.103051  | 0.744543                                   | 0.291836  |           |           |
| 0.195413                                   |           | H         | 5.661466  | 1.744593                                   | -1.562966 |           |           |
| B3LYP-D3BJ/BSII SCF energy:                |           | H         | 8.032707  | 2.183073                                   | -2.126533 |           |           |
| -1914.892681                               |           | H         | 9.838439  | 1.432681                                   | -0.590051 |           |           |
|                                            |           | H         | 9.249412  | 0.244882                                   | 1.513824  |           |           |
| C                                          | -5.298710 | 1.328512  | 0.328176  | H                                          | 6.876663  | -0.189515 | 2.071552  |
| C                                          | -4.375153 | 0.231164  | -0.258440 | C                                          | 4.659646  | 0.433407  | 0.609072  |
| C                                          | -2.871643 | 0.437002  | 0.067322  | C                                          | 4.237648  | -0.955491 | 0.072437  |
| C                                          | -2.010444 | -0.836973 | -0.164798 | H                                          | 4.004706  | 1.194289  | 0.171150  |
| C                                          | -0.489183 | -0.539757 | -0.265470 | H                                          | 4.499543  | 0.460467  | 1.693191  |
| C                                          | 0.439628  | -1.768829 | -0.080500 | C                                          | 2.816705  | -1.275801 | 0.414854  |
| F                                          | -6.517640 | 1.206025  | -0.209925 | H                                          | 4.389249  | -0.991951 | -1.011476 |
| F                                          | -5.397690 | 1.198834  | 1.654716  | H                                          | 4.897931  | -1.712611 | 0.515530  |
| F                                          | -4.817682 | 2.545422  | 0.039232  | C                                          | 1.850686  | -1.488051 | -0.479682 |
| F                                          | -4.784844 | -0.959121 | 0.238205  | H                                          | 2.568380  | -1.318712 | 1.474013  |
| F                                          | -4.530655 | 0.233453  | -1.599538 | H                                          | 2.027601  | -1.440502 | -1.549751 |
| F                                          | -2.410156 | 1.439529  | -0.715436 |                                            |           |           |           |
| F                                          | -2.755778 | 0.800995  | 1.365847  | <b>TS</b>                                  |           |           |           |
| F                                          | -2.241552 | -1.685083 | 0.862233  | B3LYP-D3BJ/BSI SCF energy:                 |           |           |           |
| F                                          | -2.409026 | -1.420754 | -1.319771 | -1926.281229                               |           |           |           |
| F                                          | -0.257710 | -0.007023 | -1.492178 | G <sub>corr</sub> at B3LYP-D3BJ/BSI level: |           |           |           |
| F                                          | -0.161196 | 0.379987  | 0.677410  | 0.197108                                   |           |           |           |
| F                                          | -0.083927 | -2.780160 | -0.845213 | B3LYP-D3BJ/BSII SCF energy:                |           |           |           |
| F                                          | 0.347747  | -2.142908 | 1.228083  | -1926.880711                               |           |           |           |
| C                                          | 6.448118  | 1.412241  | -0.890013 |                                            |           |           |           |
| C                                          | 7.784105  | 1.659189  | -1.207972 | C                                          | -6.582284 | 0.949475  | -0.004547 |
| C                                          | 8.798201  | 1.238678  | -0.345837 | C                                          | -5.289117 | 1.514454  | -0.644673 |
| C                                          | 8.466798  | 0.571487  | 0.834971  | C                                          | -3.989632 | 0.838978  | -0.130109 |

|   |           |           |           |                                            |           |           |           |
|---|-----------|-----------|-----------|--------------------------------------------|-----------|-----------|-----------|
| C | -2.758383 | 1.104382  | -1.041785 | H                                          | 3.501546  | 2.285352  | 0.221754  |
| C | -1.403781 | 0.818542  | -0.334146 | H                                          | 3.602006  | 0.730387  | 1.057002  |
| C | -0.202511 | 0.651356  | -1.296305 | C                                          | 2.251759  | 0.196763  | -1.318658 |
| F | -7.607678 | 1.751148  | -0.313917 | H                                          | 3.903681  | 1.176272  | -1.968626 |
| F | -6.837175 | -0.277146 | -0.468586 | H                                          | 4.269879  | -0.336102 | -1.216342 |
| F | -6.455466 | 0.900488  | 1.328088  | C                                          | 1.137147  | 0.704763  | -0.580367 |
| F | -5.381763 | 1.345100  | -1.984275 | H                                          | 2.047913  | -0.526127 | -2.107180 |
| F | -5.228270 | 2.833537  | -0.364412 | H                                          | 1.303584  | 1.645345  | -0.056385 |
| F | -3.731572 | 1.315776  | 1.109014  | H                                          | 1.128256  | -0.112501 | 0.253793  |
| F | -4.188596 | -0.496230 | -0.061213 | I                                          | 1.918154  | -2.118248 | 1.206551  |
| F | -2.864153 | 0.318882  | -2.136194 |                                            |           |           |           |
| F | -2.770012 | 2.402801  | -1.423988 | <b>12</b>                                  |           |           |           |
| F | -1.137027 | 1.860166  | 0.494568  | B3LYP-D3BJ/BSI SCF energy:                 |           |           |           |
| F | -1.511159 | -0.310679 | 0.400146  | -1926.341405                               |           |           |           |
| F | -0.265314 | 1.650432  | -2.226795 | G <sub>corr</sub> at B3LYP-D3BJ/BSI level: |           |           |           |
| F | -0.337213 | -0.532894 | -1.947542 | 0.205074                                   |           |           |           |
| C | 6.135278  | 2.615010  | -0.135207 | B3LYP-D3BJ/BSII SCF energy:                |           |           |           |
| C | 7.521846  | 2.740925  | -0.041263 | -1926.943615                               |           |           |           |
| C | 8.278348  | 1.722819  | 0.541722  |                                            |           |           |           |
| C | 7.641766  | 0.580793  | 1.031411  | C                                          | -6.376134 | 0.605213  | 0.504705  |
| C | 6.255448  | 0.457407  | 0.937342  | C                                          | -5.120581 | 0.601936  | -0.403022 |
| C | 5.488618  | 1.474063  | 0.353538  | C                                          | -3.786394 | 0.434367  | 0.372518  |
| H | 5.549022  | 3.412643  | -0.585271 | C                                          | -2.593984 | 0.023104  | -0.537783 |
| H | 8.010120  | 3.634645  | -0.418658 | C                                          | -1.208164 | 0.284309  | 0.116622  |
| H | 9.357058  | 1.821014  | 0.618182  | C                                          | -0.026070 | -0.478037 | -0.533319 |
| H | 8.223270  | -0.212435 | 1.491730  | F                                          | -7.433573 | 0.995101  | -0.216171 |
| H | 5.759940  | -0.429123 | 1.324956  | F                                          | -6.609399 | -0.619144 | 0.986376  |
| C | 3.993561  | 1.307328  | 0.213462  | F                                          | -6.209100 | 1.456589  | 1.525921  |
| C | 3.646380  | 0.556565  | -1.081815 | F                                          | -5.256153 | -0.411934 | -1.288666 |

|   |           |           |           |   |          |           |           |
|---|-----------|-----------|-----------|---|----------|-----------|-----------|
| F | -5.087183 | 1.775857  | -1.068971 | H | 6.566962 | 4.784890  | -0.138673 |
| F | -3.504010 | 1.611905  | 0.976249  | H | 8.778937 | 3.649978  | -0.193000 |
| F | -3.948279 | -0.519595 | 1.318045  | H | 8.906255 | 1.186210  | 0.120660  |
| F | -2.723319 | -1.290179 | -0.824865 | H | 6.838075 | -0.127980 | 0.481304  |
| F | -2.658705 | 0.736459  | -1.686834 | C | 4.266764 | 0.760969  | 0.546000  |
| F | -0.965807 | 1.618137  | 0.038558  | C | 3.762154 | 0.219551  | -0.801375 |
| F | -1.262084 | -0.068860 | 1.426369  | H | 3.491104 | 1.376463  | 1.014119  |
| F | -0.138353 | -0.329222 | -1.891237 | H | 4.458177 | -0.080683 | 1.219662  |
| F | -0.196202 | -1.797368 | -0.253726 | C | 2.511107 | -0.648314 | -0.748616 |
| C | 5.468151  | 2.963967  | 0.196361  | H | 3.516723 | 1.068084  | -1.456568 |
| C | 6.630834  | 3.708516  | -0.007169 | H | 4.563949 | -0.332633 | -1.299472 |
| C | 7.872681  | 3.072208  | -0.037407 | C | 1.326249 | 0.031019  | -0.066585 |
| C | 7.943442  | 1.688726  | 0.138084  | H | 2.244217 | -0.977365 | -1.751399 |
| C | 6.778807  | 0.948653  | 0.341413  | H | 1.361171 | 1.094448  | -0.325774 |
| C | 5.526741  | 1.576442  | 0.373789  | H | 1.375854 | -0.036115 | 1.021795  |
| H | 4.503455  | 3.464999  | 0.222649  | I | 3.008887 | -2.608411 | 0.245094  |

## 8. References

1. Yang, J.; Chen, T.; Han, L.-B. *J. Am. Chem. Soc.* **2015**, *137*, 1782 – 1785.
2. Huang, X.-T.; Long, Z.-Y.; Chen, Q.-Y. *J. Fluorine Chem.* **1999**, *93*, 81 – 86.
3. Lee, D. S.; Cho, E. J.; *Org. Biomol. Chem.*, **2019**, *17*, 4317 – 4325.
4. Kitazume, T.; Ikeya, T. *J. Org. Chem.* **1988**, *53*, 2350 – 2352.
5. Iizuka, M.; Yoshida, M. *J. Fluorine Chem.* **2009**, *130*, 926 – 932.
6. Huang, X.-T.; Long, Z.-Y.; Chen, Q.-Y. *J. Fluorine Chem.* **2001**, *111*, 107 – 113.
7. Li, Z.; Garcia-Dominguez, A.; Nevado, C. *J. Am. Chem. Soc.* **2015**, *137*, 11610 – 11613.
8. Job, P. *Justus Liebigs Ann. Chem.* **1928**, *9*, 113.
9. Berkeley; Hanna. *J. Physic. Chem.* **1963**, *67*, 846.
10. Hanna; Ashbaugh. *J. Physic. Chem.* **1964**, *68*, 811.
11. Foster, R.; Fyfe, C. A. *Trans. Faraday Soc.* **1965**, *61*, 1626.
12. Foster, R.; Fyfe, C. A. *J. Chem. Soc., Chem. Commun.* **1965**, 642.
13. Frisch, M. J.; Trucks, G. W.; Schlegel, H. B.; Scuseria, G. E.; Robb, M. A.; Cheeseman, J. R.; Scalmani, G.; Barone, V.; Petersson, G. A.; Nakatsuji, H.; Li, X.; Caricato, M.; Marenich, A. V.; Bloino, J.; Janesko, B. G.; Gomperts, R.; Mennucci, B.; Hratchian, H. P.; Ortiz, J. V.; Izmaylov, A. F.; Sonnenberg, J. L.; Williams-Young, D.; Ding, F.; Lipparini, F.; Egidi, F.; Goings, J.; Peng, B.; Petrone, A.; Henderson, T.; Ranasinghe, D.; Zakrzewski, V. G.; Gao, J.; Rega, N.; Zheng, G.; Liang, W.; Hada, M.; Ehara, M.; Toyota, K.; Fukuda, R.; Hasegawa, J.; Ishida, M.; Nakajima, T.; Honda, Y.; Kitao, O.; Nakai, H.; Vreven, T.; Throssell, K.; Montgomery, J. A.; Peralta, Jr., J. E.; Ogliaro, F.; Bearpark, M. J.; Heyd, J. J.; Brothers, E. N.; Kudin, K. N.; Staroverov, V. N.; Keith, T. A.; Kobayashi, R.; Normand, J.; Raghavachari, K.; Rendell, A. P.; Burant, J. C.; Iyengar, S. S.; Tomasi, J.; Cossi, M.; Millam, J. M.; Klene, M.; Adamo, C.; Cammi, R.; Ochterski, J. W.; Martin, R. L.; Morokuma, K.; Farkas, O.; Foresman, J. B.; Fox, D. J. *Gaussian 16, Revision A.03*; Gaussian, Inc., Wallingford CT, 2016.
14. Stephens, P. J.; Devlin, F. J.; Chabalowski, C. F.; Frisch, M. J. *J. Phys. Chem.* **1994**, *98*, 11623 – 11627.
15. (a) Grimme, S.; Antony, J.; Ehrlich, S.; Krieg, H. *J. Chem. Phys.* **2010**, *132*, 154104; (b) Grimme, S.; Ehrlich, S.; Goerigk, L. *J. Comput. Chem.* **2011**, *32*, 1456 – 1465.
16. Marenich, A. V.; Cramer, C. J.; Truhlar, D. G. *J. Phys. Chem. B* **2009**, *113*, 6378 – 6396.
17. (a) Dolg, M.; Wedig, U.; Stoll, H.; Preuss, H. *J. Chem. Phys.* **1987**, *86*, 866 – 872; (b) Andrae, D.; Häußermann, U.; Dolg, M.; Stoll, H.; Preuß, H. *Theor. Chim. Acta.* **1990**, *77*, 123 – 141.

18. Engelage, E.; Schulz, N.; Heinen, F.; Huber, S. M.; Truhlar, D. G.; Cramer, C. J. *Chem. Eur. J.* **2018**, *24*, 15983 – 15987.
